# Supplementary material for: Expression and Function of Phosphodiesterase Type 5 in Human Breast Cancer Cell Lines and Tissues: Implications for Targeted Therapy
Source: Oxford University Press journal article supplement (doi:10.1158/1078-0432.ccr-15-1900), 2015-12-14
Supplement: 10780432ccr151900-sup-153811_1_supp_3223946_nxnybz.docx [file 10780432ccr151900-sup-153811_1_supp_3223946_nxnybz.docx]

**Supplementary Table 2:** Differentially expressed genes identified by RNA sequencing in PDE5-overexpressing MCF-7 cells compared to empty-vector transfected cells.

| **Gene Name** | **Mean Expr** | **Fold Change** | **p-value** | **FDR** |
| --- | --- | --- | --- | --- |
| TENM3 | 271 | -10.77 | 2.94E-113 | 2.02E-110 |
| NELL2 | 55 | -7.90 | 1.07E-41 | 1.47E-39 |
| PLXDC2 | 276 | -7.69 | 4.19E-100 | 2.32E-97 |
| CRISPLD1 | 58 | -7.16 | 8.82E-39 | 1.12E-36 |
| MME | 480 | -6.78 | 1.03E-137 | 1.24E-134 |
| MALRD1 | 408 | -6.63 | 4.65E-112 | 3.05E-109 |
| RIMS2 | 72 | -6.09 | 4.24E-37 | 5.01E-35 |
| SAGE1 | 137 | -6.01 | 1.96E-50 | 3.50E-48 |
| SESN3 | 109 | -5.97 | 1.25E-44 | 1.92E-42 |
| CLSTN2 | 189 | -5.74 | 3.62E-61 | 8.85E-59 |
| BAMBI | 2288 | -5.71 | 4.20E-306 | 3.03E-302 |
| MAP2 | 109 | -5.63 | 1.06E-41 | 1.47E-39 |
| VTCN1 | 595 | -5.44 | 1.48E-136 | 1.64E-133 |
| DRD1 | 143 | -5.43 | 1.09E-49 | 1.87E-47 |
| RP11-662G23.1 | 82 | -5.30 | 5.56E-35 | 5.95E-33 |
| PDE3B | 322 | -4.87 | 4.92E-79 | 2.15E-76 |
| HCAR1 | 566 | -4.76 | 3.81E-117 | 2.89E-114 |
| CRISP3 | 111 | -4.69 | 9.83E-36 | 1.10E-33 |
| NECAB1 | 849 | -4.63 | 3.83E-134 | 3.95E-131 |
| TFPI | 143 | -4.45 | 2.69E-40 | 3.62E-38 |
| SRGAP3 | 245 | -4.35 | 3.67E-57 | 8.27E-55 |
| CT45A5 | 65 | -4.25 | 1.64E-24 | 1.02E-22 |
| CTSF | 111 | -4.09 | 3.51E-30 | 2.91E-28 |
| DHRS2 | 820 | -3.96 | 9.15E-121 | 7.34E-118 |
| WNT11 | 35 | -3.90 | 2.53E-18 | 9.66E-17 |
| CECR2 | 71 | -3.71 | 7.64E-22 | 3.97E-20 |
| ZNF704 | 510 | -3.68 | 2.38E-78 | 9.82E-76 |
| ADAMTS19 | 910 | -3.60 | 6.96E-112 | 4.37E-109 |
| CSTA | 34 | -3.59 | 2.51E-16 | 8.08E-15 |
| XYLT1 | 155 | -3.57 | 7.90E-33 | 7.45E-31 |
| SETBP1 | 64 | -3.47 | 7.57E-19 | 3.04E-17 |
| PMP22 | 5175 | -3.46 | 2.53E-197 | 7.30E-194 |
| PCDH8 | 42 | -3.35 | 8.40E-16 | 2.51E-14 |
| RNF43 | 579 | -3.10 | 7.48E-65 | 2.00E-62 |
| SLC5A8 | 175 | -3.09 | 1.51E-27 | 1.07E-25 |
| RAB9B | 197 | -3.01 | 5.78E-31 | 5.00E-29 |
| SLC27A6 | 187 | -3.01 | 1.63E-29 | 1.30E-27 |
| GFRA1 | 6299 | -2.98 | 9.43E-156 | 1.24E-152 |
| VAT1L | 108 | -2.97 | 1.63E-20 | 7.60E-19 |
| FRAS1 | 27 | -2.94 | 7.92E-12 | 1.60E-10 |
| KCNMA1 | 109 | -2.90 | 8.03E-20 | 3.53E-18 |
| ABCA12 | 1082 | -2.89 | 2.34E-71 | 7.35E-69 |
| LRFN5 | 23 | -2.87 | 2.91E-11 | 5.48E-10 |
| RNF152 | 253 | -2.82 | 9.23E-32 | 8.22E-30 |
| AC108142.1 | 16 | -2.78 | 6.79E-11 | 1.22E-09 |
| GDAP1 | 964 | -2.75 | 4.38E-76 | 1.62E-73 |
| NRXN3 | 19 | -2.74 | 1.84E-10 | 3.05E-09 |
| SHISA2 | 74 | -2.73 | 2.43E-14 | 6.24E-13 |
| CDK6 | 876 | -2.73 | 2.66E-72 | 8.92E-70 |
| C6orf141 | 192 | -2.73 | 1.76E-25 | 1.13E-23 |
| APOD | 18 | -2.71 | 2.44E-10 | 4.00E-09 |
| CA11 | 105 | -2.71 | 1.83E-16 | 5.98E-15 |
| PGM1 | 98 | -2.70 | 5.59E-16 | 1.71E-14 |
| ACSL4 | 69 | -2.67 | 1.85E-13 | 4.42E-12 |
| FAM110B | 119 | -2.66 | 2.77E-18 | 1.05E-16 |
| PCLO | 388 | -2.66 | 2.15E-33 | 2.09E-31 |
| ZNF264 | 15 | -2.61 | 6.68E-10 | 1.03E-08 |
| SLC4A10 | 106 | -2.60 | 3.17E-15 | 8.93E-14 |
| CRABP1 | 56 | -2.56 | 2.65E-11 | 5.04E-10 |
| GALNT14 | 274 | -2.56 | 7.07E-29 | 5.52E-27 |
| BRINP2 | 45 | -2.53 | 2.53E-10 | 4.13E-09 |
| MECOM | 199 | -2.53 | 3.69E-22 | 1.97E-20 |
| EDNRA | 20 | -2.52 | 5.69E-09 | 7.77E-08 |
| PAK6 | 24 | -2.51 | 5.31E-09 | 7.29E-08 |
| APOC1 | 18 | -2.50 | 6.46E-09 | 8.76E-08 |
| MAGEA12 | 128 | -2.48 | 2.51E-16 | 8.08E-15 |
| CXCR4 | 426 | -2.47 | 5.72E-36 | 6.51E-34 |
| PLEKHS1 | 172 | -2.45 | 1.27E-19 | 5.48E-18 |
| TSPAN5 | 83 | -2.44 | 1.66E-12 | 3.61E-11 |
| CCR1 | 50 | -2.42 | 7.88E-10 | 1.21E-08 |
| ADCY5 | 130 | -2.40 | 1.50E-15 | 4.38E-14 |
| METTL7A | 210 | -2.40 | 1.76E-20 | 8.16E-19 |
| PCOLCE2 | 50 | -2.39 | 1.00E-09 | 1.51E-08 |
| MMP16 | 432 | -2.35 | 1.59E-30 | 1.34E-28 |
| DSCAM | 1036 | -2.35 | 4.93E-60 | 1.15E-57 |
| COL4A5 | 15 | -2.34 | 4.69E-08 | 5.60E-07 |
| EOMES | 30 | -2.33 | 5.24E-08 | 6.20E-07 |
| ACPP | 44 | -2.33 | 9.37E-09 | 1.25E-07 |
| LRG1 | 38 | -2.31 | 4.33E-08 | 5.21E-07 |
| DMRTA1 | 96 | -2.29 | 3.50E-12 | 7.34E-11 |
| FBXO27 | 577 | -2.29 | 5.45E-34 | 5.43E-32 |
| DOCK10 | 133 | -2.29 | 2.29E-14 | 5.89E-13 |
| SLIT2 | 16 | -2.28 | 1.46E-07 | 1.60E-06 |
| CXCL12 | 148 | -2.28 | 1.35E-14 | 3.62E-13 |
| SOCS2-AS1 | 23 | -2.23 | 3.54E-07 | 3.67E-06 |
| PLK2 | 1829 | -2.23 | 3.23E-64 | 8.33E-62 |
| HCAR2 | 32 | -2.22 | 2.05E-07 | 2.20E-06 |
| SDK1 | 304 | -2.20 | 9.35E-22 | 4.84E-20 |
| RP11-68L18.1 | 64 | -2.20 | 6.88E-09 | 9.30E-08 |
| KCNJ3 | 43 | -2.19 | 1.14E-07 | 1.28E-06 |
| CSAG1 | 75 | -2.19 | 1.26E-09 | 1.87E-08 |
| PADI2 | 105 | -2.18 | 4.39E-11 | 8.04E-10 |
| ZMAT1 | 346 | -2.18 | 8.19E-23 | 4.53E-21 |
| MAGEA6 | 165 | -2.18 | 2.56E-14 | 6.54E-13 |
| GBP2 | 41 | -2.17 | 1.89E-07 | 2.04E-06 |
| TMEM150C | 4281 | -2.17 | 4.90E-82 | 2.28E-79 |
| CYP2E1 | 21 | -2.17 | 1.05E-06 | 1.00E-05 |
| HMCN1 | 15528 | -2.15 | 1.73E-80 | 7.79E-78 |
| SOCS2 | 100 | -2.14 | 3.66E-10 | 5.86E-09 |
| TMEM64 | 5795 | -2.14 | 1.70E-109 | 1.02E-106 |
| SOX9 | 19 | -2.14 | 1.55E-06 | 1.44E-05 |
| MAML2 | 25 | -2.11 | 2.01E-06 | 1.83E-05 |
| APOBEC3B | 127 | -2.11 | 1.38E-11 | 2.71E-10 |
| RIPPLY3 | 127 | -2.10 | 2.55E-11 | 4.84E-10 |
| KIF5C | 194 | -2.10 | 8.73E-16 | 2.59E-14 |
| HRK | 39 | -2.10 | 6.14E-07 | 6.15E-06 |
| PCSK6 | 364 | -2.09 | 4.98E-23 | 2.81E-21 |
| BCL2 | 386 | -2.08 | 5.28E-24 | 3.18E-22 |
| MBNL2 | 281 | -2.08 | 3.08E-17 | 1.07E-15 |
| SEMA6A | 60 | -2.07 | 7.65E-08 | 8.84E-07 |
| NUP62CL | 80 | -2.06 | 1.28E-08 | 1.67E-07 |
| ARHGEF6 | 131 | -2.06 | 3.85E-11 | 7.10E-10 |
| FGF12 | 17 | -2.05 | 5.32E-06 | 4.45E-05 |
| PACSIN3 | 1267 | -2.04 | 4.89E-40 | 6.42E-38 |
| RP11-293B20.2 | 97 | -2.04 | 1.96E-09 | 2.85E-08 |
| SIGLEC6 | 73 | -2.03 | 1.10E-07 | 1.24E-06 |
| PCP4 | 159 | -2.02 | 2.51E-12 | 5.33E-11 |
| ZNF28 | 537 | -2.02 | 2.18E-26 | 1.45E-24 |
| PCDH19 | 283 | -2.02 | 1.33E-17 | 4.77E-16 |
| CYP4F35P | 41 | -2.02 | 2.23E-06 | 2.01E-05 |
| TNS3 | 812 | -2.02 | 3.99E-32 | 3.62E-30 |
| ELOVL2 | 27 | -2.01 | 7.39E-06 | 6.02E-05 |
| NR5A2 | 33 | -2.01 | 5.04E-06 | 4.24E-05 |
| SEPP1 | 15 | -1.98 | 1.31E-05 | 1.02E-04 |
| ZNF804B | 32 | -1.98 | 8.80E-06 | 7.05E-05 |
| DPY19L2P1 | 44 | -1.98 | 4.06E-06 | 3.48E-05 |
| ZIC3 | 23 | -1.97 | 1.60E-05 | 1.22E-04 |
| RGS16 | 132 | -1.97 | 5.68E-10 | 8.88E-09 |
| PLEKHG1 | 25 | -1.96 | 2.07E-05 | 1.54E-04 |
| LEPREL2 | 60 | -1.96 | 7.20E-07 | 7.13E-06 |
| ZNF615 | 45 | -1.95 | 3.54E-06 | 3.07E-05 |
| PCDH1 | 731 | -1.95 | 7.85E-31 | 6.67E-29 |
| TCEAL1 | 648 | -1.95 | 6.55E-30 | 5.34E-28 |
| CCDC82 | 38 | -1.94 | 1.10E-05 | 8.59E-05 |
| B4GALNT3 | 154 | -1.94 | 7.99E-10 | 1.22E-08 |
| LINC00925 | 83 | -1.94 | 2.13E-07 | 2.27E-06 |
| ADAMTS19-AS1 | 100 | -1.94 | 3.05E-08 | 3.78E-07 |
| BMF | 477 | -1.93 | 3.03E-21 | 1.52E-19 |
| MAGEA3 | 168 | -1.93 | 2.00E-11 | 3.84E-10 |
| CHN1 | 259 | -1.91 | 1.32E-13 | 3.19E-12 |
| PIK3R1 | 2615 | -1.91 | 2.71E-54 | 5.75E-52 |
| DNMBP | 318 | -1.91 | 2.21E-17 | 7.75E-16 |
| TCF7L1 | 126 | -1.90 | 8.10E-09 | 1.09E-07 |
| WDR17 | 74 | -1.90 | 4.62E-07 | 4.71E-06 |
| DLC1 | 369 | -1.90 | 1.32E-18 | 5.11E-17 |
| ANO1 | 19 | -1.90 | 5.21E-05 | 3.57E-04 |
| DEGS1 | 1318 | -1.90 | 2.99E-35 | 3.24E-33 |
| PPARA | 327 | -1.90 | 3.64E-16 | 1.13E-14 |
| MUC3A | 99 | -1.89 | 5.78E-08 | 6.79E-07 |
| ANKRD30B | 22 | -1.89 | 5.57E-05 | 3.79E-04 |
| GPR173 | 33 | -1.88 | 3.70E-05 | 2.61E-04 |
| REL | 653 | -1.88 | 8.97E-21 | 4.36E-19 |
| BCL11B | 77 | -1.88 | 1.26E-06 | 1.19E-05 |
| MIR4435-1HG | 397 | -1.88 | 1.08E-18 | 4.22E-17 |
| COL2A1 | 41 | -1.88 | 2.04E-05 | 1.52E-04 |
| LIG1 | 1237 | -1.87 | 4.79E-32 | 4.33E-30 |
| OVOL2 | 67 | -1.87 | 1.94E-06 | 1.77E-05 |
| AKAP12 | 133 | -1.87 | 3.31E-09 | 4.63E-08 |
| ADORA2B | 70 | -1.87 | 2.76E-06 | 2.45E-05 |
| MORF4L2 | 6189 | -1.87 | 1.43E-67 | 4.06E-65 |
| NXT2 | 400 | -1.86 | 6.79E-18 | 2.50E-16 |
| SCNN1A | 395 | -1.86 | 4.18E-18 | 1.56E-16 |
| ITGB6 | 445 | -1.85 | 2.09E-18 | 8.01E-17 |
| RP11-428L9.2 | 163 | -1.85 | 4.35E-10 | 6.92E-09 |
| STC1 | 16 | -1.85 | 1.00E-04 | 6.43E-04 |
| ZNF280C | 167 | -1.85 | 5.10E-10 | 8.00E-09 |
| RBPMS | 385 | -1.84 | 1.78E-17 | 6.31E-16 |
| ASTN2 | 227 | -1.84 | 1.84E-12 | 3.97E-11 |
| CENPI | 399 | -1.83 | 5.12E-18 | 1.90E-16 |
| GS1-174L6.4 | 33 | -1.82 | 8.50E-05 | 5.56E-04 |
| KYNU | 3584 | -1.82 | 1.46E-57 | 3.35E-55 |
| CYP1B1 | 3227 | -1.82 | 2.99E-50 | 5.26E-48 |
| GNB4 | 37 | -1.81 | 9.01E-05 | 5.85E-04 |
| CXorf57 | 32 | -1.81 | 1.30E-04 | 8.10E-04 |
| TCEAL4 | 3392 | -1.81 | 7.01E-51 | 1.27E-48 |
| LRP12 | 157 | -1.80 | 4.78E-09 | 6.60E-08 |
| SGCG | 453 | -1.80 | 1.53E-18 | 5.91E-17 |
| C5 | 455 | -1.80 | 4.37E-17 | 1.49E-15 |
| PYGO1 | 73 | -1.80 | 4.56E-06 | 3.88E-05 |
| HUNK | 111 | -1.80 | 2.12E-07 | 2.27E-06 |
| LINC00173 | 20 | -1.79 | 2.34E-04 | 1.37E-03 |
| SLC16A10 | 70 | -1.79 | 7.72E-06 | 6.27E-05 |
| BHLHB9 | 149 | -1.79 | 4.54E-08 | 5.43E-07 |
| SEMA3E | 91 | -1.79 | 1.25E-06 | 1.19E-05 |
| FUT9 | 623 | -1.79 | 7.60E-20 | 3.35E-18 |
| ATP11C | 1154 | -1.79 | 4.72E-27 | 3.23E-25 |
| CDCA7L | 767 | -1.79 | 7.36E-26 | 4.77E-24 |
| ANKRD20A5P | 152 | -1.79 | 9.60E-09 | 1.27E-07 |
| RNF150 | 164 | -1.78 | 5.31E-09 | 7.29E-08 |
| FBXO17 | 261 | -1.78 | 3.11E-11 | 5.83E-10 |
| WDR62 | 643 | -1.78 | 2.19E-19 | 9.27E-18 |
| ITGA2B | 73 | -1.78 | 8.31E-06 | 6.70E-05 |
| RPRM | 100 | -1.78 | 8.27E-07 | 8.09E-06 |
| FAM43A | 96 | -1.77 | 3.87E-06 | 3.33E-05 |
| AC008268.1 | 20 | -1.77 | 2.99E-04 | 1.69E-03 |
| PRAF2 | 27 | -1.77 | 2.71E-04 | 1.55E-03 |
| EPB41L4A | 145 | -1.77 | 4.12E-08 | 4.99E-07 |
| RERG | 428 | -1.77 | 2.06E-16 | 6.70E-15 |
| ANKS1B | 217 | -1.77 | 1.38E-10 | 2.33E-09 |
| ADCY1 | 1319 | -1.76 | 3.08E-30 | 2.57E-28 |
| GRIP1 | 80 | -1.76 | 4.78E-06 | 4.04E-05 |
| GLDN | 149 | -1.76 | 6.22E-08 | 7.27E-07 |
| SMAD3 | 1590 | -1.76 | 9.22E-35 | 9.72E-33 |
| FILIP1L | 95 | -1.76 | 2.91E-06 | 2.57E-05 |
| KCNB1 | 36 | -1.75 | 2.09E-04 | 1.23E-03 |
| SORL1 | 1091 | -1.75 | 1.19E-22 | 6.52E-21 |
| CRABP2 | 3380 | -1.75 | 1.90E-44 | 2.88E-42 |
| GPRIN3 | 79 | -1.74 | 1.06E-05 | 8.36E-05 |
| TRMT2B | 1036 | -1.74 | 1.46E-28 | 1.12E-26 |
| SLC39A6 | 26281 | -1.74 | 5.19E-54 | 1.09E-51 |
| KIF15 | 660 | -1.74 | 1.34E-20 | 6.29E-19 |
| PAG1 | 31 | -1.74 | 3.02E-04 | 1.71E-03 |
| EFEMP1 | 1172 | -1.74 | 4.25E-27 | 2.95E-25 |
| MBNL3 | 870 | -1.74 | 1.24E-19 | 5.37E-18 |
| DOCK8 | 329 | -1.74 | 1.44E-12 | 3.18E-11 |
| ACSS1 | 1052 | -1.74 | 6.08E-28 | 4.45E-26 |
| HEG1 | 108 | -1.73 | 1.21E-06 | 1.15E-05 |
| ENOX2 | 406 | -1.73 | 3.03E-15 | 8.60E-14 |
| STOX1 | 151 | -1.73 | 4.51E-08 | 5.40E-07 |
| NFKBIZ | 362 | -1.73 | 2.11E-13 | 5.01E-12 |
| DAAM2 | 15 | -1.73 | 5.05E-04 | 2.68E-03 |
| JAG1 | 35 | -1.73 | 2.84E-04 | 1.62E-03 |
| PROS1 | 49 | -1.73 | 1.07E-04 | 6.80E-04 |
| N4BP2 | 850 | -1.73 | 9.46E-21 | 4.57E-19 |
| GPRASP1 | 26 | -1.72 | 4.96E-04 | 2.65E-03 |
| UNC13A | 72 | -1.72 | 4.18E-05 | 2.92E-04 |
| GLA | 429 | -1.72 | 3.43E-13 | 7.98E-12 |
| ABCG1 | 1220 | -1.72 | 4.77E-30 | 3.91E-28 |
| DDB2 | 1104 | -1.72 | 4.69E-27 | 3.23E-25 |
| PDE1A | 75 | -1.72 | 2.23E-05 | 1.65E-04 |
| GABRA3 | 26 | -1.71 | 6.40E-04 | 3.31E-03 |
| LIN7A | 210 | -1.71 | 1.69E-09 | 2.47E-08 |
| MYCN | 16 | -1.71 | 6.64E-04 | 3.42E-03 |
| SLC37A2 | 36 | -1.71 | 3.84E-04 | 2.12E-03 |
| NUF2 | 540 | -1.70 | 2.53E-17 | 8.82E-16 |
| ARMCX5 | 171 | -1.70 | 2.53E-07 | 2.66E-06 |
| SYNE1 | 262 | -1.70 | 1.28E-10 | 2.17E-09 |
| FAM19A5 | 87 | -1.70 | 2.36E-05 | 1.74E-04 |
| FAM83B | 793 | -1.70 | 2.40E-21 | 1.22E-19 |
| RHOH | 26 | -1.70 | 7.09E-04 | 3.63E-03 |
| BTG2 | 251 | -1.70 | 3.42E-10 | 5.52E-09 |
| CCDC74A | 88 | -1.70 | 1.54E-05 | 1.18E-04 |
| SMPD3 | 24 | -1.70 | 7.88E-04 | 3.98E-03 |
| ISOC1 | 3697 | -1.69 | 3.25E-40 | 4.34E-38 |
| TMEM47 | 17 | -1.69 | 8.75E-04 | 4.37E-03 |
| SLC27A2 | 717 | -1.69 | 1.20E-20 | 5.72E-19 |
| CDCA7 | 261 | -1.69 | 2.66E-09 | 3.80E-08 |
| GALNT1 | 1660 | -1.69 | 7.97E-32 | 7.15E-30 |
| SNAP25 | 98 | -1.69 | 1.02E-05 | 8.09E-05 |
| SCIN | 519 | -1.68 | 2.14E-15 | 6.16E-14 |
| SYNE2 | 6654 | -1.68 | 1.52E-23 | 8.79E-22 |
| RNF145 | 509 | -1.68 | 5.05E-16 | 1.55E-14 |
| PRPS2 | 1140 | -1.68 | 2.19E-25 | 1.39E-23 |
| APCDD1 | 35 | -1.68 | 5.30E-04 | 2.81E-03 |
| ERC2 | 123 | -1.68 | 1.48E-06 | 1.37E-05 |
| MAGI2 | 88 | -1.68 | 2.72E-05 | 1.98E-04 |
| HNF4G | 23 | -1.68 | 1.06E-03 | 5.13E-03 |
| JPH1 | 600 | -1.68 | 1.98E-17 | 6.97E-16 |
| CNTRL | 374 | -1.67 | 2.82E-12 | 5.96E-11 |
| PTGER4 | 675 | -1.67 | 1.65E-16 | 5.41E-15 |
| DLX3 | 149 | -1.67 | 3.56E-07 | 3.68E-06 |
| TRIM45 | 1628 | -1.67 | 4.57E-31 | 4.00E-29 |
| RP4-769N13.6 | 73 | -1.67 | 9.29E-05 | 6.02E-04 |
| CSTF2 | 647 | -1.67 | 3.14E-18 | 1.18E-16 |
| ACKR3 | 3305 | -1.67 | 6.94E-42 | 9.83E-40 |
| HIVEP3 | 296 | -1.67 | 7.18E-11 | 1.28E-09 |
| ASPM | 2432 | -1.66 | 1.04E-23 | 6.12E-22 |
| LPCAT2 | 113 | -1.65 | 6.05E-06 | 5.02E-05 |
| CENPV | 73 | -1.65 | 9.76E-05 | 6.29E-04 |
| DDX26B | 313 | -1.65 | 9.33E-11 | 1.64E-09 |
| TOP2A | 10744 | -1.65 | 4.74E-44 | 7.12E-42 |
| CDON | 200 | -1.65 | 3.87E-08 | 4.70E-07 |
| SLC25A5 | 10061 | -1.65 | 7.63E-54 | 1.57E-51 |
| PIM1 | 135 | -1.65 | 4.27E-06 | 3.65E-05 |
| CUL4B | 1605 | -1.65 | 4.64E-28 | 3.44E-26 |
| TMEM164 | 672 | -1.65 | 1.12E-17 | 4.06E-16 |
| PRLR | 4665 | -1.65 | 1.14E-28 | 8.83E-27 |
| GBP3 | 16 | -1.65 | 1.51E-03 | 7.03E-03 |
| FBXO4 | 228 | -1.65 | 8.01E-09 | 1.08E-07 |
| YDJC | 195 | -1.65 | 2.44E-06 | 2.19E-05 |
| CAMK1D | 592 | -1.65 | 6.41E-14 | 1.60E-12 |
| ZNF695 | 29 | -1.65 | 1.30E-03 | 6.14E-03 |
| EFCAB4B | 261 | -1.64 | 2.71E-09 | 3.86E-08 |
| IRS1 | 1708 | -1.64 | 1.49E-23 | 8.69E-22 |
| PHEX | 30 | -1.64 | 1.20E-03 | 5.73E-03 |
| SLC25A14 | 182 | -1.64 | 1.59E-07 | 1.74E-06 |
| NOX5 | 142 | -1.64 | 2.09E-06 | 1.90E-05 |
| EPM2A | 188 | -1.64 | 1.32E-07 | 1.46E-06 |
| NMNAT2 | 129 | -1.64 | 3.47E-06 | 3.02E-05 |
| HOXC10 | 131 | -1.63 | 5.84E-06 | 4.85E-05 |
| FAM102B | 4779 | -1.63 | 4.44E-28 | 3.31E-26 |
| NVL | 998 | -1.63 | 8.58E-20 | 3.76E-18 |
| AKR1E2 | 83 | -1.63 | 9.38E-05 | 6.07E-04 |
| DLG2 | 37 | -1.63 | 1.13E-03 | 5.44E-03 |
| MNS1 | 126 | -1.63 | 5.78E-06 | 4.81E-05 |
| PTGER2 | 83 | -1.63 | 7.55E-05 | 5.00E-04 |
| ABCC8 | 65 | -1.63 | 3.70E-04 | 2.05E-03 |
| FAM81A | 69 | -1.62 | 3.02E-04 | 1.71E-03 |
| LINC00648 | 100 | -1.62 | 7.74E-05 | 5.11E-04 |
| BEX5 | 68 | -1.62 | 1.95E-04 | 1.16E-03 |
| GABBR2 | 189 | -1.62 | 2.30E-07 | 2.44E-06 |
| LINC00630 | 87 | -1.62 | 1.08E-04 | 6.88E-04 |
| MYB | 973 | -1.62 | 1.15E-17 | 4.15E-16 |
| N4BP3 | 5283 | -1.62 | 1.88E-19 | 8.02E-18 |
| RP11-158H5.7 | 45 | -1.61 | 8.77E-04 | 4.38E-03 |
| CCDC28A | 283 | -1.61 | 4.98E-09 | 6.86E-08 |
| STAG2 | 3376 | -1.61 | 1.11E-31 | 9.74E-30 |
| RDM1 | 55 | -1.61 | 5.15E-04 | 2.74E-03 |
| PEAK1 | 509 | -1.61 | 9.20E-12 | 1.83E-10 |
| MT1F | 167 | -1.61 | 2.35E-06 | 2.12E-05 |
| EPHA4 | 253 | -1.61 | 4.28E-08 | 5.17E-07 |
| MKI67 | 10482 | -1.61 | 7.77E-27 | 5.29E-25 |
| IL1RAP | 138 | -1.61 | 1.06E-05 | 8.32E-05 |
| BLM | 612 | -1.61 | 1.46E-15 | 4.27E-14 |
| MITF | 91 | -1.61 | 1.56E-04 | 9.49E-04 |
| CTHRC1 | 31 | -1.60 | 2.09E-03 | 9.32E-03 |
| TMPRSS4 | 40 | -1.60 | 1.63E-03 | 7.52E-03 |
| ST3GAL1 | 1630 | -1.60 | 7.10E-24 | 4.22E-22 |
| FAT4 | 39 | -1.60 | 1.61E-03 | 7.42E-03 |
| TIMM8A | 364 | -1.60 | 1.17E-10 | 2.01E-09 |
| GRM4 | 416 | -1.60 | 2.00E-10 | 3.31E-09 |
| AIM1 | 1810 | -1.60 | 1.21E-27 | 8.66E-26 |
| POLA1 | 1461 | -1.60 | 1.09E-21 | 5.62E-20 |
| IQGAP3 | 1214 | -1.60 | 2.58E-21 | 1.30E-19 |
| BUB1B | 783 | -1.59 | 7.52E-16 | 2.27E-14 |
| PRIMA1 | 87 | -1.59 | 1.50E-04 | 9.21E-04 |
| ZNF114 | 171 | -1.59 | 1.81E-06 | 1.66E-05 |
| EPB41L2 | 758 | -1.59 | 2.53E-16 | 8.13E-15 |
| RP3-523K23.2 | 379 | -1.59 | 4.72E-09 | 6.52E-08 |
| EXOSC5 | 356 | -1.59 | 2.03E-07 | 2.18E-06 |
| ARHGAP11A | 1395 | -1.59 | 1.75E-19 | 7.46E-18 |
| HLF | 34 | -1.59 | 2.24E-03 | 9.83E-03 |
| MORF4L2-AS1 | 22 | -1.59 | 3.38E-03 | 1.40E-02 |
| MED30 | 139 | -1.59 | 9.89E-06 | 7.84E-05 |
| TMEM56 | 157 | -1.59 | 3.08E-06 | 2.70E-05 |
| ACHE | 112 | -1.59 | 7.08E-05 | 4.71E-04 |
| KCNMB4 | 158 | -1.58 | 4.21E-06 | 3.60E-05 |
| OXTR | 69 | -1.58 | 4.49E-04 | 2.43E-03 |
| BCAS3 | 7419 | -1.58 | 2.33E-33 | 2.25E-31 |
| PDE4B | 34 | -1.58 | 2.97E-03 | 1.26E-02 |
| ZNF566 | 262 | -1.58 | 7.90E-08 | 9.09E-07 |
| LINC01116 | 69 | -1.58 | 4.83E-04 | 2.58E-03 |
| PXK | 121 | -1.58 | 2.51E-05 | 1.84E-04 |
| SLC24A3 | 642 | -1.58 | 1.27E-14 | 3.42E-13 |
| FGFR2 | 644 | -1.57 | 9.87E-14 | 2.41E-12 |
| CLDN1 | 17 | -1.57 | 4.10E-03 | 1.65E-02 |
| MID2 | 474 | -1.57 | 8.26E-12 | 1.66E-10 |
| TCEAL3 | 868 | -1.57 | 3.49E-16 | 1.09E-14 |
| HMGB2 | 4809 | -1.57 | 2.85E-33 | 2.72E-31 |
| SLC16A5 | 72 | -1.57 | 4.34E-04 | 2.36E-03 |
| MAP9 | 311 | -1.57 | 1.78E-07 | 1.93E-06 |
| TRIM7 | 248 | -1.57 | 7.33E-08 | 8.49E-07 |
| GAD1 | 30 | -1.57 | 3.58E-03 | 1.48E-02 |
| ANKRD36C | 112 | -1.57 | 1.26E-04 | 7.86E-04 |
| CENPA | 497 | -1.57 | 5.54E-12 | 1.14E-10 |
| CD302 | 38 | -1.57 | 3.16E-03 | 1.33E-02 |
| C1orf112 | 480 | -1.56 | 5.29E-11 | 9.60E-10 |
| ZNF75D | 1247 | -1.56 | 1.30E-19 | 5.60E-18 |
| PLEKHH2 | 588 | -1.56 | 1.88E-13 | 4.48E-12 |
| RP11-346D6.6 | 1162 | -1.56 | 2.98E-18 | 1.13E-16 |
| NR2F2-AS1 | 38 | -1.56 | 3.62E-03 | 1.49E-02 |
| PAPL | 46 | -1.56 | 2.42E-03 | 1.05E-02 |
| AC009061.1 | 15 | -1.56 | 4.80E-03 | 1.89E-02 |
| RP1-228P16.3 | 27 | -1.56 | 4.43E-03 | 1.77E-02 |
| CCDC88B | 54 | -1.56 | 1.47E-03 | 6.88E-03 |
| ATG4A | 438 | -1.56 | 3.53E-11 | 6.56E-10 |
| ENOX1 | 23 | -1.56 | 5.04E-03 | 1.97E-02 |
| CIT | 1264 | -1.56 | 9.49E-21 | 4.57E-19 |
| CEP128 | 226 | -1.56 | 4.97E-07 | 5.04E-06 |
| ONECUT2 | 287 | -1.55 | 2.78E-08 | 3.46E-07 |
| PIP4K2A | 1131 | -1.55 | 3.10E-16 | 9.82E-15 |
| LONRF2 | 1187 | -1.55 | 2.19E-17 | 7.72E-16 |
| ZBTB10 | 906 | -1.55 | 1.81E-15 | 5.24E-14 |
| LAMP2 | 2580 | -1.55 | 1.82E-29 | 1.45E-27 |
| FAM199X | 1727 | -1.55 | 4.73E-19 | 1.93E-17 |
| DEPTOR | 188 | -1.55 | 2.83E-06 | 2.50E-05 |
| NRM | 501 | -1.55 | 6.39E-10 | 9.92E-09 |
| FSD1L | 124 | -1.55 | 7.20E-05 | 4.79E-04 |
| CASC5 | 1162 | -1.55 | 1.65E-16 | 5.41E-15 |
| TPM3P9 | 397 | -1.55 | 4.93E-09 | 6.80E-08 |
| CCDC170 | 5854 | -1.55 | 7.50E-36 | 8.46E-34 |
| RAP1GAP | 708 | -1.55 | 5.22E-13 | 1.20E-11 |
| LOXL3 | 121 | -1.55 | 6.32E-05 | 4.25E-04 |
| ARSJ | 31 | -1.55 | 4.41E-03 | 1.76E-02 |
| LCA5 | 72 | -1.55 | 9.38E-04 | 4.63E-03 |
| C17orf104 | 18 | -1.55 | 5.99E-03 | 2.28E-02 |
| ZNF541 | 80 | -1.55 | 6.65E-04 | 3.43E-03 |
| DOCK4 | 69 | -1.54 | 7.29E-04 | 3.71E-03 |
| RP11-512M8.3 | 39 | -1.54 | 4.24E-03 | 1.70E-02 |
| GAS2L3 | 747 | -1.54 | 8.65E-12 | 1.73E-10 |
| KIF18B | 828 | -1.54 | 1.64E-15 | 4.76E-14 |
| ZBTB33 | 971 | -1.54 | 1.73E-15 | 5.01E-14 |
| KIF14 | 1473 | -1.54 | 6.91E-17 | 2.32E-15 |
| CCDC61 | 58 | -1.54 | 1.54E-03 | 7.17E-03 |
| RP11-524H19.2 | 27 | -1.54 | 6.29E-03 | 2.38E-02 |
| NEURL1 | 35 | -1.54 | 4.65E-03 | 1.84E-02 |
| RNU6-8 | 35 | -1.53 | 4.34E-03 | 1.74E-02 |
| COL12A1 | 65 | -1.53 | 1.66E-03 | 7.63E-03 |
| FBL | 2614 | -1.53 | 1.52E-27 | 1.07E-25 |
| PER3 | 581 | -1.53 | 1.00E-10 | 1.74E-09 |
| DLK2 | 27 | -1.53 | 6.53E-03 | 2.45E-02 |
| ONECUT1 | 23 | -1.53 | 6.75E-03 | 2.52E-02 |
| PCDHB4 | 29 | -1.53 | 5.83E-03 | 2.23E-02 |
| SGOL1 | 426 | -1.53 | 4.01E-09 | 5.60E-08 |
| HMGB1P5 | 43 | -1.53 | 3.28E-03 | 1.37E-02 |
| DEPDC1B | 805 | -1.53 | 8.49E-15 | 2.30E-13 |
| AC005229.1 | 18 | -1.53 | 7.34E-03 | 2.71E-02 |
| FAXDC2 | 189 | -1.53 | 4.04E-06 | 3.47E-05 |
| ANKRD18B | 145 | -1.53 | 3.84E-05 | 2.70E-04 |
| ZNF813 | 269 | -1.53 | 6.73E-07 | 6.71E-06 |
| CEP55 | 1359 | -1.52 | 2.51E-19 | 1.05E-17 |
| RBMX2 | 527 | -1.52 | 1.37E-10 | 2.31E-09 |
| NKRF | 516 | -1.52 | 4.11E-11 | 7.56E-10 |
| SLC4A7 | 992 | -1.52 | 2.25E-14 | 5.79E-13 |
| CD44 | 264 | -1.52 | 2.69E-07 | 2.83E-06 |
| FOS | 101 | -1.52 | 3.54E-04 | 1.97E-03 |
| SLC25A53 | 57 | -1.52 | 2.00E-03 | 8.97E-03 |
| TMC5 | 48 | -1.52 | 3.03E-03 | 1.28E-02 |
| VEGFC | 33 | -1.52 | 5.67E-03 | 2.18E-02 |
| RBM47 | 2146 | -1.52 | 1.26E-24 | 7.90E-23 |
| CA8 | 292 | -1.52 | 1.98E-07 | 2.13E-06 |
| EIF5A2 | 224 | -1.52 | 2.83E-06 | 2.50E-05 |
| ARID5B | 794 | -1.52 | 2.34E-13 | 5.55E-12 |
| FANCD2 | 2506 | -1.52 | 1.27E-22 | 6.93E-21 |
| NBEA | 771 | -1.52 | 4.41E-12 | 9.13E-11 |
| ELP2 | 3359 | -1.52 | 7.95E-23 | 4.41E-21 |
| RP11-395N3.1 | 26 | -1.52 | 8.18E-03 | 2.97E-02 |
| FAM122B | 3164 | -1.52 | 2.41E-28 | 1.81E-26 |
| TET1 | 144 | -1.52 | 7.64E-05 | 5.05E-04 |
| TMEM156 | 18 | -1.52 | 8.62E-03 | 3.11E-02 |
| TMEM194B | 303 | -1.52 | 1.04E-07 | 1.17E-06 |
| NUSAP1 | 1711 | -1.52 | 2.33E-19 | 9.81E-18 |
| SIPA1L3 | 886 | -1.51 | 4.22E-10 | 6.73E-09 |
| SP4 | 249 | -1.51 | 9.48E-07 | 9.19E-06 |
| SYTL4 | 54 | -1.51 | 2.91E-03 | 1.24E-02 |
| EMC3-AS1 | 385 | -1.51 | 1.88E-08 | 2.39E-07 |
| AC015849.16 | 59 | -1.51 | 2.20E-03 | 9.71E-03 |
| SMC2 | 1905 | -1.51 | 4.69E-19 | 1.93E-17 |
| E2F7 | 574 | -1.51 | 2.20E-10 | 3.61E-09 |
| SYT12 | 1423 | -1.51 | 3.47E-15 | 9.72E-14 |
| EPHX4 | 36 | -1.51 | 6.71E-03 | 2.51E-02 |
| ZNF367 | 884 | -1.51 | 5.76E-15 | 1.59E-13 |
| NDC80 | 762 | -1.51 | 2.35E-13 | 5.56E-12 |
| KNTC1 | 2625 | -1.51 | 2.14E-22 | 1.15E-20 |
| FAM127C | 1149 | -1.51 | 6.24E-16 | 1.90E-14 |
| KIAA1024 | 29 | -1.51 | 8.08E-03 | 2.94E-02 |
| KIF20B | 973 | -1.51 | 2.60E-14 | 6.66E-13 |
| PALLD | 1442 | -1.51 | 1.31E-18 | 5.07E-17 |
| PTPRN2 | 49 | -1.50 | 4.07E-03 | 1.65E-02 |
| SLC25A43 | 982 | -1.50 | 1.36E-12 | 3.01E-11 |
| CYP4B1 | 46 | -1.50 | 4.40E-03 | 1.76E-02 |
| PPIL2 | 812 | -1.50 | 5.99E-14 | 1.50E-12 |
| C9orf40 | 197 | -1.50 | 1.37E-05 | 1.06E-04 |
| ATRNL1 | 39 | -1.50 | 7.03E-03 | 2.61E-02 |
| ANKRD36 | 135 | -1.50 | 1.87E-04 | 1.12E-03 |
| ANKRD36B | 63 | -1.50 | 2.56E-03 | 1.11E-02 |
| IGFBP4 | 3841 | -1.50 | 2.19E-25 | 1.39E-23 |
| RPL39 | 8252 | -1.50 | 9.59E-32 | 8.50E-30 |
| WEE1 | 857 | -1.50 | 2.00E-14 | 5.22E-13 |
| MXD3 | 280 | -1.50 | 1.09E-04 | 6.95E-04 |
| TMEM194A | 1411 | -1.50 | 2.06E-16 | 6.70E-15 |
| TMEM38B | 1045 | -1.50 | 6.35E-15 | 1.74E-13 |
| UBE2L3 | 1531 | -1.50 | 1.48E-19 | 6.36E-18 |
| KIFC1 | 1748 | -1.50 | 6.98E-19 | 2.83E-17 |
| NR2F2 | 2559 | -1.50 | 2.83E-22 | 1.52E-20 |
| ANKRD20A14P | 21 | -1.50 | 1.10E-02 | 3.79E-02 |
| CTD-3099C6.9 | 86 | -1.50 | 9.70E-04 | 4.76E-03 |
| MYLIP | 651 | -1.50 | 7.60E-12 | 1.54E-10 |
| PSMD10 | 1118 | -1.49 | 2.84E-16 | 9.04E-15 |
| MAN1A1 | 385 | -1.49 | 2.37E-08 | 2.97E-07 |
| DPY19L2P3 | 54 | -1.49 | 3.39E-03 | 1.41E-02 |
| EDA2R | 46 | -1.49 | 5.89E-03 | 2.25E-02 |
| KIAA0355 | 316 | -1.49 | 2.21E-07 | 2.36E-06 |
| SUSD3 | 96 | -1.49 | 6.47E-04 | 3.35E-03 |
| RP11-21L23.2 | 53 | -1.49 | 3.91E-03 | 1.59E-02 |
| SLAIN1 | 105 | -1.49 | 7.15E-04 | 3.66E-03 |
| PTCH1 | 238 | -1.49 | 2.80E-06 | 2.48E-05 |
| KIF11 | 2099 | -1.49 | 5.70E-22 | 2.99E-20 |
| ZNF611 | 239 | -1.49 | 3.50E-06 | 3.04E-05 |
| RASSF8 | 600 | -1.49 | 1.81E-10 | 2.99E-09 |
| TSC22D3 | 1148 | -1.49 | 7.72E-14 | 1.90E-12 |
| RP11-54O7.17 | 32 | -1.49 | 9.93E-03 | 3.48E-02 |
| PGAP1 | 584 | -1.49 | 4.12E-10 | 6.58E-09 |
| TTK | 829 | -1.49 | 9.27E-13 | 2.08E-11 |
| FTL | 3067 | -1.49 | 6.84E-24 | 4.08E-22 |
| DBP | 104 | -1.49 | 1.05E-03 | 5.08E-03 |
| PLLP | 85 | -1.49 | 1.19E-03 | 5.69E-03 |
| HSD17B6 | 56 | -1.49 | 3.91E-03 | 1.59E-02 |
| NUDT1 | 737 | -1.49 | 1.60E-10 | 2.68E-09 |
| EGR1 | 715 | -1.49 | 1.06E-09 | 1.60E-08 |
| CYP2J2 | 573 | -1.49 | 8.79E-11 | 1.55E-09 |
| AURKB | 923 | -1.49 | 7.81E-12 | 1.58E-10 |
| FRMD3 | 74 | -1.49 | 2.19E-03 | 9.70E-03 |
| RP11-466H18.1 | 172 | -1.48 | 5.73E-05 | 3.88E-04 |
| RMI1 | 675 | -1.48 | 1.50E-11 | 2.91E-10 |
| ANKRD32 | 497 | -1.48 | 1.75E-08 | 2.24E-07 |
| UGCG | 696 | -1.48 | 9.90E-11 | 1.72E-09 |
| SLC4A8 | 911 | -1.48 | 4.51E-14 | 1.14E-12 |
| KIAA0754 | 168 | -1.48 | 4.11E-05 | 2.87E-04 |
| PCDHA10 | 17 | -1.48 | 1.33E-02 | 4.47E-02 |
| TMPO-AS1 | 287 | -1.48 | 7.91E-07 | 7.79E-06 |
| BIRC5 | 661 | -1.48 | 3.25E-11 | 6.07E-10 |
| BARD1 | 754 | -1.48 | 2.43E-12 | 5.18E-11 |
| BCL2L12 | 461 | -1.48 | 1.66E-07 | 1.81E-06 |
| MYADM | 722 | -1.48 | 5.21E-10 | 8.17E-09 |
| FBXO48 | 53 | -1.48 | 6.15E-03 | 2.33E-02 |
| CAV1 | 176 | -1.48 | 4.85E-05 | 3.35E-04 |
| KIF13B | 678 | -1.48 | 1.43E-11 | 2.80E-10 |
| IL13RA1 | 1706 | -1.48 | 3.51E-17 | 1.21E-15 |
| ARL4A | 1123 | -1.47 | 1.25E-15 | 3.67E-14 |
| IER5 | 569 | -1.47 | 1.96E-10 | 3.24E-09 |
| KIF12 | 175 | -1.47 | 1.86E-04 | 1.12E-03 |
| CENPK | 509 | -1.47 | 1.78E-09 | 2.60E-08 |
| PRDM5 | 50 | -1.47 | 5.64E-03 | 2.17E-02 |
| DDAH1 | 791 | -1.47 | 1.74E-12 | 3.77E-11 |
| FGFBP3 | 56 | -1.47 | 4.97E-03 | 1.95E-02 |
| HSPA2 | 189 | -1.47 | 5.40E-05 | 3.68E-04 |
| HNRNPUL1 | 5396 | -1.47 | 1.77E-25 | 1.14E-23 |
| CES3 | 24 | -1.47 | 1.43E-02 | 4.73E-02 |
| FAM132B | 40 | -1.47 | 8.79E-03 | 3.15E-02 |
| MST4 | 892 | -1.47 | 4.49E-13 | 1.03E-11 |
| FKBP5 | 968 | -1.47 | 2.31E-14 | 5.94E-13 |
| HSD17B11 | 58 | -1.47 | 4.48E-03 | 1.78E-02 |
| PSIP1 | 1256 | -1.47 | 5.87E-16 | 1.79E-14 |
| FANCI | 3346 | -1.47 | 1.30E-20 | 6.11E-19 |
| ZNF574 | 283 | -1.47 | 2.74E-05 | 2.00E-04 |
| TAF4B | 205 | -1.47 | 1.90E-05 | 1.43E-04 |
| RNF113A | 252 | -1.47 | 2.95E-06 | 2.60E-05 |
| ZNF750 | 117 | -1.47 | 4.37E-04 | 2.37E-03 |
| USH1G | 28 | -1.47 | 1.42E-02 | 4.70E-02 |
| THAP10 | 164 | -1.47 | 8.91E-05 | 5.79E-04 |
| NPTX1 | 60 | -1.47 | 4.15E-03 | 1.67E-02 |
| NAP1L1 | 8558 | -1.47 | 1.57E-28 | 1.20E-26 |
| CXorf56 | 663 | -1.47 | 4.36E-11 | 7.99E-10 |
| LAMA3 | 88 | -1.47 | 2.63E-03 | 1.14E-02 |
| KIAA1524 | 954 | -1.46 | 1.56E-12 | 3.41E-11 |
| DLGAP5 | 1239 | -1.46 | 3.78E-15 | 1.05E-13 |
| SH3GL3 | 33 | -1.46 | 1.44E-02 | 4.75E-02 |
| GPR64 | 116 | -1.46 | 5.32E-04 | 2.82E-03 |
| FRMD4A | 377 | -1.46 | 8.13E-08 | 9.34E-07 |
| NOD1 | 143 | -1.46 | 2.67E-04 | 1.53E-03 |
| GHR | 145 | -1.46 | 2.69E-04 | 1.54E-03 |
| KRT8P12 | 217 | -1.46 | 1.84E-05 | 1.38E-04 |
| NCAPH | 1315 | -1.46 | 2.19E-15 | 6.30E-14 |
| ZWINT | 2213 | -1.46 | 1.11E-20 | 5.28E-19 |
| CAPN9 | 38 | -1.46 | 1.05E-02 | 3.64E-02 |
| ESPL1 | 1331 | -1.46 | 3.08E-15 | 8.73E-14 |
| POLD1 | 668 | -1.46 | 4.30E-03 | 1.72E-02 |
| SRGAP1 | 502 | -1.46 | 9.71E-09 | 1.29E-07 |
| GPRASP2 | 248 | -1.46 | 4.74E-06 | 4.02E-05 |
| MBOAT1 | 261 | -1.46 | 3.14E-06 | 2.75E-05 |
| EVL | 2597 | -1.46 | 3.01E-16 | 9.54E-15 |
| DIAPH2 | 304 | -1.46 | 4.04E-06 | 3.47E-05 |
| GPC4 | 675 | -1.46 | 3.52E-10 | 5.66E-09 |
| PRC1 | 3087 | -1.46 | 3.88E-22 | 2.07E-20 |
| CDC25C | 352 | -1.46 | 2.09E-07 | 2.24E-06 |
| WWOX | 920 | -1.46 | 1.59E-12 | 3.47E-11 |
| KIF24 | 273 | -1.46 | 6.35E-06 | 5.24E-05 |
| RNF157 | 414 | -1.46 | 4.44E-08 | 5.33E-07 |
| ANP32E | 2212 | -1.46 | 6.14E-20 | 2.72E-18 |
| CPAMD8 | 79 | -1.46 | 2.60E-03 | 1.12E-02 |
| DOK1 | 173 | -1.46 | 8.76E-05 | 5.71E-04 |
| BUB1 | 1551 | -1.46 | 3.42E-15 | 9.60E-14 |
| BAI2 | 106 | -1.46 | 1.44E-03 | 6.75E-03 |
| CALM3 | 4154 | -1.46 | 5.39E-24 | 3.23E-22 |
| IMPA2 | 522 | -1.46 | 3.94E-08 | 4.79E-07 |
| PTTG1 | 851 | -1.46 | 9.20E-12 | 1.83E-10 |
| TMEM55A | 86 | -1.46 | 2.05E-03 | 9.16E-03 |
| SDF2L1 | 192 | -1.46 | 1.83E-04 | 1.10E-03 |
| GPNMB | 33 | -1.46 | 1.38E-02 | 4.59E-02 |
| FOXM1 | 3210 | -1.46 | 5.14E-23 | 2.89E-21 |
| CTC-471F3.5 | 33 | -1.45 | 1.37E-02 | 4.56E-02 |
| HOXC13 | 480 | -1.45 | 1.55E-08 | 1.99E-07 |
| GNA14 | 113 | -1.45 | 8.13E-04 | 4.09E-03 |
| WDR76 | 687 | -1.45 | 3.00E-10 | 4.85E-09 |
| MIR600HG | 183 | -1.45 | 7.91E-05 | 5.22E-04 |
| C6orf211 | 9325 | -1.45 | 5.44E-23 | 3.04E-21 |
| TICRR | 675 | -1.45 | 6.17E-10 | 9.61E-09 |
| RELL1 | 183 | -1.45 | 1.19E-04 | 7.46E-04 |
| GEM | 61 | -1.45 | 5.30E-03 | 2.06E-02 |
| PPAP2B | 220 | -1.45 | 3.77E-05 | 2.66E-04 |
| TCEA3 | 223 | -1.45 | 5.86E-05 | 3.97E-04 |
| KALRN | 230 | -1.45 | 1.54E-05 | 1.18E-04 |
| TOPBP1 | 3015 | -1.45 | 4.04E-21 | 1.99E-19 |
| CKLF | 36 | -1.45 | 1.29E-02 | 4.35E-02 |
| MYBL1 | 316 | -1.45 | 4.44E-06 | 3.78E-05 |
| FANCC | 717 | -1.45 | 8.38E-10 | 1.28E-08 |
| CERS6 | 2074 | -1.45 | 8.53E-14 | 2.09E-12 |
| PLK4 | 865 | -1.45 | 1.48E-11 | 2.88E-10 |
| GPSM2 | 1638 | -1.45 | 1.03E-16 | 3.39E-15 |
| CCDC18 | 210 | -1.45 | 3.62E-05 | 2.56E-04 |
| EFCAB7 | 72 | -1.45 | 5.34E-03 | 2.08E-02 |
| SPDL1 | 907 | -1.45 | 2.47E-12 | 5.25E-11 |
| ZDHHC9 | 740 | -1.45 | 4.56E-10 | 7.23E-09 |
| ECE1 | 1096 | -1.44 | 9.96E-13 | 2.23E-11 |
| ZNF761 | 1039 | -1.44 | 4.08E-13 | 9.43E-12 |
| HNRNPH2 | 2360 | -1.44 | 2.11E-18 | 8.08E-17 |
| GPR98 | 534 | -1.44 | 5.27E-07 | 5.32E-06 |
| UBE2A | 1639 | -1.44 | 6.33E-17 | 2.13E-15 |
| ACVR2B | 572 | -1.44 | 2.16E-08 | 2.72E-07 |
| RCN1 | 749 | -1.44 | 1.54E-10 | 2.58E-09 |
| NEK2 | 596 | -1.44 | 5.38E-09 | 7.37E-08 |
| FAM72D | 154 | -1.44 | 3.10E-04 | 1.75E-03 |
| ELF4 | 942 | -1.44 | 2.21E-12 | 4.73E-11 |
| CALD1 | 43 | -1.44 | 1.31E-02 | 4.41E-02 |
| GADD45G | 46 | -1.44 | 1.19E-02 | 4.06E-02 |
| AC099850.1 | 456 | -1.44 | 3.06E-08 | 3.78E-07 |
| MAGED1 | 2252 | -1.44 | 2.83E-16 | 9.04E-15 |
| SLC1A2 | 97 | -1.44 | 2.38E-03 | 1.04E-02 |
| PBK | 986 | -1.44 | 6.12E-12 | 1.25E-10 |
| STMN1 | 4147 | -1.44 | 2.70E-22 | 1.45E-20 |
| RP11-262H14.4 | 92 | -1.44 | 2.44E-03 | 1.06E-02 |
| DEGS2 | 432 | -1.44 | 6.30E-03 | 2.38E-02 |
| PAX9 | 384 | -1.44 | 4.74E-07 | 4.83E-06 |
| ZNF397 | 529 | -1.44 | 2.27E-08 | 2.85E-07 |
| UPF3B | 623 | -1.44 | 2.08E-08 | 2.63E-07 |
| ZNF519 | 127 | -1.44 | 9.06E-04 | 4.50E-03 |
| TCF19 | 1508 | -1.43 | 1.76E-14 | 4.62E-13 |
| FANCB | 188 | -1.43 | 1.64E-04 | 9.93E-04 |
| SEPT10 | 811 | -1.43 | 1.21E-10 | 2.06E-09 |
| AMMECR1 | 592 | -1.43 | 5.76E-09 | 7.86E-08 |
| MCM10 | 1377 | -1.43 | 8.48E-12 | 1.70E-10 |
| RP11-244O19.1 | 66 | -1.43 | 6.13E-03 | 2.33E-02 |
| RP1-152L7.5 | 134 | -1.43 | 8.41E-04 | 4.22E-03 |
| SHCBP1 | 980 | -1.43 | 8.47E-12 | 1.70E-10 |
| LINC00669 | 101 | -1.43 | 2.31E-03 | 1.01E-02 |
| TEX30 | 262 | -1.43 | 3.99E-05 | 2.80E-04 |
| CATSPERG | 51 | -1.43 | 1.07E-02 | 3.72E-02 |
| CARD8 | 327 | -1.43 | 5.47E-06 | 4.57E-05 |
| TP53I11 | 1425 | -1.43 | 4.44E-10 | 7.03E-09 |
| LURAP1L | 158 | -1.43 | 5.03E-04 | 2.68E-03 |
| KCNK2 | 87 | -1.43 | 3.47E-03 | 1.44E-02 |
| RHOBTB3 | 1252 | -1.43 | 9.69E-13 | 2.17E-11 |
| TANC2 | 4527 | -1.43 | 1.28E-18 | 4.99E-17 |
| STRADB | 333 | -1.43 | 2.80E-06 | 2.48E-05 |
| NCAPG | 1006 | -1.43 | 2.19E-12 | 4.72E-11 |
| MYBL2 | 4383 | -1.43 | 4.36E-20 | 1.96E-18 |
| SLC30A4 | 63 | -1.43 | 8.75E-03 | 3.14E-02 |
| NR2C2 | 725 | -1.42 | 4.25E-10 | 6.77E-09 |
| BRIP1 | 10473 | -1.42 | 4.07E-24 | 2.48E-22 |
| CEP78 | 890 | -1.42 | 1.01E-10 | 1.74E-09 |
| LDOC1 | 1800 | -1.42 | 7.09E-14 | 1.75E-12 |
| MORC4 | 804 | -1.42 | 2.05E-09 | 2.97E-08 |
| JPH3 | 75 | -1.42 | 6.46E-03 | 2.43E-02 |
| FTO | 973 | -1.42 | 1.61E-11 | 3.12E-10 |
| CDCA3 | 756 | -1.42 | 9.66E-10 | 1.46E-08 |
| ESCO2 | 527 | -1.42 | 8.04E-08 | 9.25E-07 |
| SPAG5 | 1584 | -1.42 | 1.38E-12 | 3.05E-11 |
| RPL36A | 73 | -1.42 | 5.85E-03 | 2.24E-02 |
| ZNF473 | 392 | -1.42 | 1.06E-06 | 1.01E-05 |
| ALG13 | 588 | -1.42 | 1.02E-08 | 1.34E-07 |
| CENPF | 2668 | -1.42 | 1.74E-13 | 4.18E-12 |
| ROCK1 | 2325 | -1.42 | 2.67E-18 | 1.02E-16 |
| B9D2 | 47 | -1.42 | 1.50E-02 | 4.91E-02 |
| MATN1-AS1 | 50 | -1.42 | 1.38E-02 | 4.60E-02 |
| RP11-242D8.1 | 66 | -1.42 | 7.05E-03 | 2.62E-02 |
| MAP3K5 | 672 | -1.42 | 4.34E-09 | 6.03E-08 |
| LINC00992 | 299 | -1.42 | 1.03E-05 | 8.14E-05 |
| SNX10 | 598 | -1.42 | 3.09E-08 | 3.82E-07 |
| UBA2 | 2987 | -1.42 | 9.45E-19 | 3.74E-17 |
| KIF20A | 1775 | -1.42 | 1.82E-15 | 5.24E-14 |
| GALNT12 | 844 | -1.42 | 5.71E-11 | 1.03E-09 |
| CDC45 | 1002 | -1.42 | 9.36E-12 | 1.86E-10 |
| DSCC1 | 526 | -1.42 | 6.84E-08 | 7.96E-07 |
| PLK1 | 1919 | -1.41 | 2.00E-12 | 4.31E-11 |
| BHLHE40 | 1421 | -1.41 | 1.55E-13 | 3.74E-12 |
| RPRD1A | 1910 | -1.41 | 7.16E-15 | 1.96E-13 |
| RP11-889L3.1 | 49 | -1.41 | 1.47E-02 | 4.83E-02 |
| FAM195B | 63 | -1.41 | 1.48E-02 | 4.85E-02 |
| FBXO46 | 205 | -1.41 | 1.55E-04 | 9.48E-04 |
| B3GALTL | 278 | -1.41 | 2.67E-05 | 1.95E-04 |
| UBL7-AS1 | 141 | -1.41 | 8.09E-04 | 4.08E-03 |
| E2F1 | 1328 | -1.41 | 4.18E-12 | 8.68E-11 |
| SAE1 | 4176 | -1.41 | 9.71E-20 | 4.23E-18 |
| RP11-564D11.3 | 74 | -1.41 | 7.42E-03 | 2.73E-02 |
| RRM2 | 10083 | -1.41 | 3.56E-26 | 2.34E-24 |
| RP11-296I10.6 | 128 | -1.41 | 2.57E-03 | 1.11E-02 |
| WNT3 | 108 | -1.41 | 3.20E-03 | 1.34E-02 |
| SOWAHC | 474 | -1.41 | 2.11E-07 | 2.25E-06 |
| SNX18P3 | 59 | -1.41 | 1.35E-02 | 4.51E-02 |
| ADCK3 | 346 | -1.41 | 1.19E-05 | 9.29E-05 |
| SDC4 | 2916 | -1.41 | 1.00E-18 | 3.95E-17 |
| MAD2L1 | 1298 | -1.41 | 5.77E-13 | 1.32E-11 |
| PRKCD | 1709 | -1.41 | 3.49E-15 | 9.76E-14 |
| AUTS2 | 726 | -1.41 | 2.30E-09 | 3.31E-08 |
| PAQR6 | 75 | -1.41 | 1.25E-02 | 4.23E-02 |
| FANCA | 988 | -1.41 | 1.70E-11 | 3.26E-10 |
| RP11-61L23.2 | 105 | -1.41 | 3.07E-03 | 1.30E-02 |
| DCLRE1C | 489 | -1.41 | 1.87E-07 | 2.02E-06 |
| MMD | 311 | -1.41 | 8.76E-06 | 7.03E-05 |
| NUP62 | 1299 | -1.41 | 1.44E-10 | 2.42E-09 |
| TRAIP | 226 | -1.41 | 1.09E-04 | 6.90E-04 |
| PDE4D | 404 | -1.41 | 1.46E-06 | 1.36E-05 |
| RAD51AP1 | 567 | -1.40 | 6.13E-08 | 7.18E-07 |
| XIAP | 2770 | -1.40 | 5.66E-17 | 1.92E-15 |
| TBC1D31 | 421 | -1.40 | 1.26E-06 | 1.19E-05 |
| NPAS3 | 100 | -1.40 | 4.61E-03 | 1.83E-02 |
| AMPH | 84 | -1.40 | 5.34E-03 | 2.08E-02 |
| EME1 | 244 | -1.40 | 6.57E-05 | 4.39E-04 |
| RAP2C | 1313 | -1.40 | 4.04E-12 | 8.41E-11 |
| EGLN3 | 108 | -1.40 | 2.83E-03 | 1.21E-02 |
| CKAP2L | 506 | -1.40 | 1.54E-06 | 1.43E-05 |
| PRDM6 | 159 | -1.40 | 6.91E-04 | 3.55E-03 |
| CDYL2 | 5131 | -1.40 | 6.02E-22 | 3.15E-20 |
| MBP | 369 | -1.40 | 2.55E-06 | 2.28E-05 |
| RP3-325F22.5 | 116 | -1.40 | 2.14E-03 | 9.51E-03 |
| RFC3 | 1287 | -1.40 | 2.42E-12 | 5.17E-11 |
| RAB27A | 646 | -1.40 | 2.16E-08 | 2.72E-07 |
| FAM72B | 156 | -1.40 | 6.93E-04 | 3.55E-03 |
| ASF1B | 1760 | -1.40 | 1.49E-12 | 3.26E-11 |
| UGT2B15 | 101 | -1.40 | 3.71E-03 | 1.52E-02 |
| RAD54B | 189 | -1.40 | 2.53E-04 | 1.47E-03 |
| UBE2T | 1598 | -1.40 | 7.40E-14 | 1.83E-12 |
| SPRY2 | 65 | -1.40 | 1.05E-02 | 3.65E-02 |
| BRCA2 | 1304 | -1.40 | 2.13E-10 | 3.51E-09 |
| NFE2L3 | 182 | -1.40 | 3.31E-04 | 1.85E-03 |
| ALDH3B2 | 1802 | -1.40 | 6.79E-10 | 1.05E-08 |
| HIST1H1C | 817 | -1.40 | 3.00E-09 | 4.23E-08 |
| NKAP | 503 | -1.40 | 8.44E-07 | 8.23E-06 |
| RHOU | 358 | -1.40 | 4.94E-06 | 4.17E-05 |
| OGFRL1 | 997 | -1.40 | 1.04E-10 | 1.80E-09 |
| CDK5RAP2 | 1614 | -1.40 | 1.25E-13 | 3.04E-12 |
| ITGB3BP | 307 | -1.40 | 1.95E-05 | 1.46E-04 |
| RP11-395P17.3 | 113 | -1.40 | 2.48E-03 | 1.08E-02 |
| RAD21 | 8799 | -1.39 | 1.43E-20 | 6.68E-19 |
| NPAT | 429 | -1.39 | 8.15E-07 | 7.98E-06 |
| CDCA2 | 547 | -1.39 | 7.37E-08 | 8.53E-07 |
| POC1A | 489 | -1.39 | 5.59E-07 | 5.63E-06 |
| MCM5 | 2442 | -1.39 | 9.34E-11 | 1.64E-09 |
| HTATSF1 | 3794 | -1.39 | 1.28E-18 | 4.99E-17 |
| KIAA1107 | 81 | -1.39 | 8.00E-03 | 2.92E-02 |
| PELI1 | 131 | -1.39 | 2.19E-03 | 9.68E-03 |
| HOXC13-AS | 103 | -1.39 | 3.88E-03 | 1.58E-02 |
| NPNT | 4792 | -1.39 | 6.64E-17 | 2.23E-15 |
| SH3BGRL2 | 906 | -1.39 | 1.14E-09 | 1.70E-08 |
| NMRK1 | 176 | -1.39 | 4.63E-04 | 2.49E-03 |
| EPB41L4B | 600 | -1.39 | 7.34E-08 | 8.49E-07 |
| RPS6KA5 | 389 | -1.39 | 4.54E-06 | 3.86E-05 |
| ZNF24 | 3833 | -1.39 | 1.01E-17 | 3.68E-16 |
| LIFR | 84 | -1.39 | 8.18E-03 | 2.97E-02 |
| SYNJ2 | 1129 | -1.39 | 9.94E-11 | 1.73E-09 |
| KNSTRN | 658 | -1.39 | 1.54E-08 | 1.99E-07 |
| CCDC150 | 103 | -1.39 | 3.89E-03 | 1.58E-02 |
| UBE2C | 1190 | -1.39 | 1.24E-11 | 2.43E-10 |
| FAM127B | 1400 | -1.39 | 1.23E-08 | 1.61E-07 |
| RPS11 | 13195 | -1.39 | 2.17E-20 | 9.95E-19 |
| GTSE1 | 735 | -1.39 | 4.11E-09 | 5.73E-08 |
| ERCC6L | 654 | -1.39 | 2.10E-07 | 2.25E-06 |
| RBM12B | 809 | -1.39 | 2.09E-08 | 2.64E-07 |
| GABPB1 | 912 | -1.39 | 4.32E-10 | 6.88E-09 |
| POLQ | 1011 | -1.39 | 3.55E-09 | 4.97E-08 |
| PROCA1 | 143 | -1.39 | 1.60E-03 | 7.39E-03 |
| SYNPO2 | 103 | -1.39 | 5.06E-03 | 1.98E-02 |
| TIMELESS | 5255 | -1.39 | 3.47E-20 | 1.57E-18 |
| VPS13A | 1209 | -1.39 | 8.19E-09 | 1.10E-07 |
| GSG2 | 261 | -1.39 | 1.94E-04 | 1.15E-03 |
| SRGAP2B | 277 | -1.39 | 1.15E-04 | 7.28E-04 |
| TTC7B | 589 | -1.38 | 1.20E-07 | 1.34E-06 |
| CENPE | 953 | -1.38 | 2.73E-09 | 3.87E-08 |
| ZNF780A | 421 | -1.38 | 6.48E-06 | 5.34E-05 |
| LRRCC1 | 313 | -1.38 | 2.70E-05 | 1.97E-04 |
| BEND3 | 257 | -1.38 | 1.30E-04 | 8.09E-04 |
| LINC00473 | 260 | -1.38 | 9.61E-05 | 6.20E-04 |
| LCORL | 342 | -1.38 | 1.53E-05 | 1.17E-04 |
| SMOC2 | 102 | -1.38 | 4.89E-03 | 1.92E-02 |
| CACNG4 | 1233 | -1.38 | 6.91E-09 | 9.34E-08 |
| UTP14A | 725 | -1.38 | 1.25E-08 | 1.64E-07 |
| ZNF614 | 212 | -1.38 | 3.01E-04 | 1.70E-03 |
| ZNF530 | 162 | -1.38 | 1.63E-03 | 7.54E-03 |
| EML6 | 206 | -1.38 | 2.64E-04 | 1.52E-03 |
| ARRB1 | 1025 | -1.38 | 1.63E-10 | 2.72E-09 |
| CCDC15 | 171 | -1.38 | 8.03E-04 | 4.05E-03 |
| FAM64A | 493 | -1.38 | 1.16E-06 | 1.10E-05 |
| PHF10 | 1588 | -1.38 | 2.20E-12 | 4.72E-11 |
| ZBTB14 | 499 | -1.38 | 1.31E-06 | 1.23E-05 |
| PPP1R3B | 631 | -1.38 | 1.79E-07 | 1.93E-06 |
| AGPAT9 | 105 | -1.38 | 4.51E-03 | 1.79E-02 |
| GINS3 | 381 | -1.38 | 4.31E-06 | 3.68E-05 |
| DHTKD1 | 5514 | -1.38 | 2.08E-20 | 9.56E-19 |
| RP11-192H23.4 | 123 | -1.38 | 4.26E-03 | 1.71E-02 |
| SKA1 | 335 | -1.38 | 1.77E-05 | 1.34E-04 |
| TMEM170A | 762 | -1.38 | 4.14E-08 | 5.01E-07 |
| ATP2B1 | 3379 | -1.38 | 3.23E-16 | 1.01E-14 |
| RPS16 | 7611 | -1.38 | 2.09E-14 | 5.45E-13 |
| CCNA2 | 1660 | -1.38 | 2.15E-12 | 4.63E-11 |
| SLC5A3 | 887 | -1.38 | 2.03E-07 | 2.18E-06 |
| CHMP2A | 1160 | -1.38 | 7.86E-11 | 1.40E-09 |
| DNMT3B | 590 | -1.38 | 1.17E-07 | 1.31E-06 |
| SLC2A13 | 65 | -1.38 | 1.52E-02 | 4.97E-02 |
| NEURL1B | 751 | -1.38 | 6.72E-08 | 7.83E-07 |
| PTPRJ | 1184 | -1.38 | 8.88E-10 | 1.35E-08 |
| PCAT7 | 70 | -1.37 | 1.43E-02 | 4.73E-02 |
| KIAA0101 | 1262 | -1.37 | 5.32E-11 | 9.63E-10 |
| SMG9 | 871 | -1.37 | 2.19E-08 | 2.75E-07 |
| MMS22L | 1072 | -1.37 | 2.38E-10 | 3.90E-09 |
| ZNF333 | 133 | -1.37 | 2.63E-03 | 1.13E-02 |
| GOLGA2P5 | 417 | -1.37 | 3.72E-06 | 3.22E-05 |
| TROAP | 1315 | -1.37 | 3.02E-11 | 5.68E-10 |
| DST | 4959 | -1.37 | 3.28E-11 | 6.12E-10 |
| MAP3K8 | 144 | -1.37 | 2.22E-03 | 9.77E-03 |
| STC2 | 2448 | -1.37 | 8.74E-15 | 2.37E-13 |
| CPNE2 | 432 | -1.37 | 5.10E-06 | 4.28E-05 |
| CENPO | 970 | -1.37 | 1.22E-09 | 1.82E-08 |
| CDC7 | 738 | -1.37 | 3.19E-08 | 3.94E-07 |
| SYDE2 | 350 | -1.37 | 1.90E-05 | 1.42E-04 |
| EHD2 | 275 | -1.37 | 2.10E-04 | 1.24E-03 |
| PPM1E | 280 | -1.37 | 6.51E-05 | 4.36E-04 |
| PRR24 | 105 | -1.37 | 8.46E-03 | 3.06E-02 |
| DBF4B | 443 | -1.37 | 4.30E-06 | 3.67E-05 |
| ARMCX3 | 1131 | -1.37 | 1.04E-10 | 1.80E-09 |
| UBALD2 | 522 | -1.37 | 4.93E-06 | 4.16E-05 |
| RBM41 | 304 | -1.37 | 9.42E-05 | 6.09E-04 |
| TMPO | 6244 | -1.37 | 6.64E-19 | 2.70E-17 |
| SKA3 | 663 | -1.37 | 1.54E-07 | 1.68E-06 |
| BCL2L11 | 940 | -1.37 | 3.58E-08 | 4.38E-07 |
| ATAD2 | 7421 | -1.37 | 1.33E-19 | 5.71E-18 |
| ZNF146 | 1957 | -1.37 | 1.60E-11 | 3.10E-10 |
| PIF1 | 152 | -1.37 | 1.69E-03 | 7.76E-03 |
| CKS2 | 1012 | -1.37 | 1.48E-08 | 1.92E-07 |
| C18orf54 | 222 | -1.37 | 2.78E-04 | 1.59E-03 |
| TTF2 | 5169 | -1.37 | 7.68E-17 | 2.56E-15 |
| CEP152 | 326 | -1.37 | 6.28E-05 | 4.22E-04 |
| RBMX | 6778 | -1.37 | 7.90E-21 | 3.85E-19 |
| RP11-303E16.2 | 299 | -1.37 | 2.54E-04 | 1.47E-03 |
| CDK1 | 2492 | -1.37 | 1.38E-14 | 3.69E-13 |
| IRX3 | 1808 | -1.37 | 2.64E-09 | 3.77E-08 |
| SPIN4 | 719 | -1.37 | 5.72E-08 | 6.72E-07 |
| KLHL24 | 388 | -1.37 | 1.47E-05 | 1.13E-04 |
| FBXO32 | 109 | -1.36 | 6.18E-03 | 2.34E-02 |
| TUBA1B | 9034 | -1.36 | 9.06E-19 | 3.61E-17 |
| BAX | 907 | -1.36 | 1.09E-07 | 1.23E-06 |
| ATAD5 | 360 | -1.36 | 4.98E-05 | 3.42E-04 |
| OLFM1 | 854 | -1.36 | 7.32E-09 | 9.87E-08 |
| ZBTB34 | 395 | -1.36 | 1.23E-05 | 9.51E-05 |
| GK | 103 | -1.36 | 6.39E-03 | 2.41E-02 |
| INCENP | 1388 | -1.36 | 1.45E-10 | 2.44E-09 |
| GPR160 | 1710 | -1.36 | 2.47E-12 | 5.25E-11 |
| RPA3 | 1516 | -1.36 | 3.54E-12 | 7.41E-11 |
| SYTL5 | 434 | -1.36 | 3.30E-05 | 2.36E-04 |
| HOXC11 | 153 | -1.36 | 2.32E-03 | 1.02E-02 |
| ZSCAN22 | 207 | -1.36 | 6.08E-04 | 3.16E-03 |
| ST5 | 107 | -1.36 | 6.13E-03 | 2.33E-02 |
| NEIL3 | 276 | -1.36 | 1.35E-04 | 8.40E-04 |
| DEPDC1 | 507 | -1.36 | 9.90E-07 | 9.53E-06 |
| RAB11FIP2 | 457 | -1.36 | 3.06E-06 | 2.68E-05 |
| WDR44 | 553 | -1.36 | 4.30E-07 | 4.40E-06 |
| AHNAK2 | 710 | -1.36 | 1.36E-06 | 1.28E-05 |
| CENPN | 1294 | -1.36 | 9.27E-11 | 1.63E-09 |
| NGFRAP1 | 2770 | -1.36 | 9.32E-13 | 2.09E-11 |
| ARHGAP11B | 376 | -1.36 | 2.96E-05 | 2.15E-04 |
| STK17B | 267 | -1.36 | 1.58E-04 | 9.61E-04 |
| ETHE1 | 197 | -1.36 | 9.25E-04 | 4.58E-03 |
| CENPL | 638 | -1.36 | 1.75E-07 | 1.89E-06 |
| AC093838.4 | 384 | -1.36 | 1.73E-05 | 1.31E-04 |
| KIF18A | 432 | -1.36 | 4.86E-06 | 4.11E-05 |
| MACROD2 | 322 | -1.36 | 7.34E-05 | 4.87E-04 |
| CCDC14 | 1497 | -1.36 | 9.39E-09 | 1.25E-07 |
| DTL | 789 | -1.36 | 8.19E-08 | 9.37E-07 |
| PFAS | 732 | -1.36 | 8.32E-08 | 9.52E-07 |
| H1F0 | 8622 | -1.36 | 2.52E-19 | 1.05E-17 |
| ADD3 | 242 | -1.36 | 4.39E-04 | 2.38E-03 |
| DEDD2 | 271 | -1.36 | 3.85E-04 | 2.12E-03 |
| RP11-673C5.1 | 320 | -1.36 | 1.06E-04 | 6.77E-04 |
| DIAPH3 | 414 | -1.36 | 1.41E-05 | 1.08E-04 |
| HPRT1 | 1674 | -1.36 | 2.80E-11 | 5.29E-10 |
| CDV3 | 5173 | -1.36 | 2.12E-14 | 5.50E-13 |
| MELK | 1067 | -1.36 | 8.47E-09 | 1.13E-07 |
| ZNF396 | 137 | -1.36 | 2.97E-03 | 1.26E-02 |
| CTSV | 299 | -1.36 | 2.90E-04 | 1.65E-03 |
| FERMT1 | 92 | -1.36 | 9.52E-03 | 3.37E-02 |
| NCAPD2 | 4813 | -1.36 | 3.01E-17 | 1.05E-15 |
| CENPM | 423 | -1.36 | 2.76E-04 | 1.58E-03 |
| ZBTB2 | 1832 | -1.36 | 3.96E-12 | 8.27E-11 |
| UBE2S | 1638 | -1.36 | 9.00E-10 | 1.37E-08 |
| TATDN2P2 | 136 | -1.36 | 3.41E-03 | 1.42E-02 |
| HSPA4L | 624 | -1.35 | 3.18E-07 | 3.32E-06 |
| CPEB3 | 143 | -1.35 | 3.04E-03 | 1.29E-02 |
| FAM83D | 1061 | -1.35 | 9.01E-10 | 1.37E-08 |
| CCSAP | 308 | -1.35 | 1.30E-04 | 8.08E-04 |
| CTNNAL1 | 764 | -1.35 | 6.89E-08 | 8.00E-07 |
| EPT1 | 3836 | -1.35 | 2.38E-15 | 6.81E-14 |
| EGLN2 | 79 | -1.35 | 1.50E-02 | 4.93E-02 |
| C1GALT1C1 | 787 | -1.35 | 1.88E-06 | 1.71E-05 |
| HMGB1 | 13443 | -1.35 | 5.55E-21 | 2.73E-19 |
| TBC1D4 | 598 | -1.35 | 5.84E-07 | 5.87E-06 |
| FAM171B | 256 | -1.35 | 3.75E-04 | 2.07E-03 |
| FAM122C | 127 | -1.35 | 6.54E-03 | 2.46E-02 |
| POLE | 3645 | -1.35 | 8.68E-16 | 2.59E-14 |
| CENPJ | 554 | -1.35 | 7.60E-07 | 7.51E-06 |
| BORA | 228 | -1.35 | 8.88E-04 | 4.42E-03 |
| SMC4 | 4276 | -1.35 | 3.55E-14 | 9.01E-13 |
| GOLIM4 | 848 | -1.35 | 4.48E-08 | 5.37E-07 |
| SNRPD2 | 3121 | -1.35 | 4.16E-15 | 1.16E-13 |
| SKAP2 | 1407 | -1.35 | 3.23E-11 | 6.04E-10 |
| EID2 | 414 | -1.35 | 1.61E-05 | 1.23E-04 |
| LMO4 | 380 | -1.35 | 2.54E-05 | 1.86E-04 |
| CCNB2 | 1180 | -1.35 | 2.50E-09 | 3.58E-08 |
| ZNF512 | 199 | -1.35 | 1.15E-03 | 5.52E-03 |
| PRKCA | 458 | -1.35 | 2.17E-05 | 1.61E-04 |
| SFXN1 | 7000 | -1.35 | 5.63E-17 | 1.91E-15 |
| BRAF | 444 | -1.35 | 1.21E-05 | 9.39E-05 |
| GEN1 | 1371 | -1.35 | 6.13E-09 | 8.34E-08 |
| HIST1H2BJ | 126 | -1.35 | 5.46E-03 | 2.12E-02 |
| RASEF | 1288 | -1.35 | 5.78E-10 | 9.03E-09 |
| TSTD2 | 474 | -1.35 | 1.86E-05 | 1.39E-04 |
| ARHGAP19 | 571 | -1.35 | 2.85E-06 | 2.51E-05 |
| MGAT5B | 159 | -1.35 | 3.45E-03 | 1.43E-02 |
| CDCA5 | 2208 | -1.35 | 4.36E-13 | 1.01E-11 |
| TMOD3 | 4735 | -1.35 | 7.94E-16 | 2.38E-14 |
| DNA2 | 559 | -1.35 | 2.56E-06 | 2.29E-05 |
| SYK | 789 | -1.35 | 8.24E-08 | 9.42E-07 |
| SUV39H2 | 625 | -1.35 | 6.31E-06 | 5.21E-05 |
| INO80C | 277 | -1.35 | 2.06E-04 | 1.22E-03 |
| PTK7 | 572 | -1.34 | 9.96E-06 | 7.88E-05 |
| SLCO3A1 | 274 | -1.34 | 3.29E-04 | 1.84E-03 |
| CDCA8 | 925 | -1.34 | 2.01E-08 | 2.54E-07 |
| HMMR | 947 | -1.34 | 1.73E-08 | 2.22E-07 |
| PRKCE | 392 | -1.34 | 2.93E-05 | 2.13E-04 |
| ANKS6 | 1496 | -1.34 | 2.95E-10 | 4.77E-09 |
| TRPM7 | 6621 | -1.34 | 4.70E-15 | 1.30E-13 |
| OIP5 | 85 | -1.34 | 1.47E-02 | 4.83E-02 |
| PPP1R3C | 827 | -1.34 | 7.27E-08 | 8.43E-07 |
| MTHFD1 | 4926 | -1.34 | 2.31E-15 | 6.61E-14 |
| LATS1 | 1406 | -1.34 | 1.76E-10 | 2.93E-09 |
| MCM8 | 766 | -1.34 | 6.18E-08 | 7.23E-07 |
| PSD3 | 545 | -1.34 | 1.65E-05 | 1.25E-04 |
| NDUFA1 | 1915 | -1.34 | 1.66E-11 | 3.20E-10 |
| SAP30L | 1014 | -1.34 | 3.43E-08 | 4.21E-07 |
| KIAA1551 | 546 | -1.34 | 2.28E-06 | 2.06E-05 |
| SPRED1 | 170 | -1.34 | 2.10E-03 | 9.35E-03 |
| CA12 | 1142 | -1.34 | 1.83E-09 | 2.68E-08 |
| KIF2C | 1013 | -1.34 | 9.23E-09 | 1.23E-07 |
| PTPN18 | 1691 | -1.34 | 1.61E-11 | 3.12E-10 |
| CBX6 | 2661 | -1.34 | 2.59E-12 | 5.48E-11 |
| ZNF271 | 744 | -1.34 | 7.68E-07 | 7.58E-06 |
| RBM3 | 1953 | -1.34 | 3.69E-11 | 6.82E-10 |
| MCEE | 210 | -1.34 | 8.76E-04 | 4.37E-03 |
| EPB41 | 1076 | -1.34 | 1.17E-08 | 1.55E-07 |
| CLSPN | 755 | -1.34 | 2.15E-07 | 2.29E-06 |
| RUNDC3B | 99 | -1.34 | 1.33E-02 | 4.47E-02 |
| PPP5C | 1479 | -1.34 | 2.83E-09 | 4.01E-08 |
| DCPS | 272 | -1.34 | 2.92E-04 | 1.66E-03 |
| RBL1 | 832 | -1.34 | 8.77E-08 | 1.00E-06 |
| UBL3 | 3928 | -1.34 | 7.19E-16 | 2.17E-14 |
| HAUS5 | 400 | -1.34 | 6.77E-05 | 4.52E-04 |
| DMXL2 | 3604 | -1.34 | 2.62E-10 | 4.25E-09 |
| CENPP | 259 | -1.34 | 4.23E-04 | 2.31E-03 |
| CTD-2510F5.4 | 324 | -1.34 | 1.20E-04 | 7.53E-04 |
| H2AFY2 | 613 | -1.34 | 2.05E-06 | 1.86E-05 |
| C16orf45 | 246 | -1.34 | 4.63E-04 | 2.49E-03 |
| ZNF92 | 258 | -1.34 | 1.32E-03 | 6.24E-03 |
| ORC1 | 543 | -1.34 | 8.74E-06 | 7.02E-05 |
| SPC25 | 532 | -1.34 | 3.40E-06 | 2.97E-05 |
| MND1 | 245 | -1.34 | 6.03E-04 | 3.14E-03 |
| OTUD3 | 295 | -1.33 | 1.91E-04 | 1.14E-03 |
| PCNA | 3857 | -1.33 | 9.14E-15 | 2.47E-13 |
| ZNF449 | 236 | -1.33 | 6.49E-04 | 3.36E-03 |
| SRR | 199 | -1.33 | 1.41E-03 | 6.60E-03 |
| ZNF496 | 688 | -1.33 | 2.24E-06 | 2.02E-05 |
| CD3EAP | 164 | -1.33 | 3.70E-03 | 1.52E-02 |
| MIR4453 | 153 | -1.33 | 3.98E-03 | 1.61E-02 |
| EPHB2 | 249 | -1.33 | 5.86E-04 | 3.06E-03 |
| TRERF1 | 902 | -1.33 | 9.16E-08 | 1.04E-06 |
| HSDL2 | 1066 | -1.33 | 1.71E-08 | 2.19E-07 |
| CLN6 | 1350 | -1.33 | 8.15E-09 | 1.09E-07 |
| ELF3 | 566 | -1.33 | 7.86E-06 | 6.37E-05 |
| AC159540.1 | 178 | -1.33 | 4.26E-03 | 1.71E-02 |
| ZNF138 | 364 | -1.33 | 6.04E-05 | 4.08E-04 |
| PRR11 | 2768 | -1.33 | 3.15E-13 | 7.34E-12 |
| C19orf48 | 1680 | -1.33 | 2.42E-06 | 2.17E-05 |
| MMGT1 | 1648 | -1.33 | 7.83E-10 | 1.20E-08 |
| NUP205 | 3431 | -1.33 | 8.22E-10 | 1.25E-08 |
| FAM111B | 653 | -1.33 | 3.41E-06 | 2.97E-05 |
| MDM1 | 493 | -1.33 | 1.52E-05 | 1.17E-04 |
| C4orf21 | 620 | -1.33 | 2.97E-06 | 2.61E-05 |
| PRX | 199 | -1.33 | 3.76E-03 | 1.54E-02 |
| ARL6IP1 | 6158 | -1.33 | 1.55E-14 | 4.11E-13 |
| FBXO5 | 601 | -1.33 | 9.40E-06 | 7.49E-05 |
| PRIM1 | 640 | -1.33 | 1.01E-06 | 9.68E-06 |
| NR1D2 | 2132 | -1.33 | 5.09E-10 | 8.00E-09 |
| MEST | 1303 | -1.33 | 2.14E-09 | 3.10E-08 |
| TBL1X | 2903 | -1.33 | 1.50E-11 | 2.91E-10 |
| MSRA | 313 | -1.33 | 3.37E-04 | 1.88E-03 |
| THOC1 | 549 | -1.33 | 5.09E-06 | 4.28E-05 |
| PLEKHG4 | 898 | -1.33 | 3.80E-07 | 3.92E-06 |
| DLG4 | 292 | -1.33 | 5.37E-04 | 2.84E-03 |
| E2F8 | 761 | -1.33 | 5.21E-07 | 5.27E-06 |
| CDKN3 | 748 | -1.32 | 1.44E-06 | 1.34E-05 |
| KIF22 | 3599 | -1.32 | 2.23E-13 | 5.29E-12 |
| MTBP | 259 | -1.32 | 2.66E-03 | 1.15E-02 |
| TBC1D8 | 385 | -1.32 | 5.57E-05 | 3.79E-04 |
| TSKU | 504 | -1.32 | 4.86E-05 | 3.35E-04 |
| TRIM32 | 584 | -1.32 | 3.66E-06 | 3.17E-05 |
| VRK3 | 502 | -1.32 | 2.09E-05 | 1.56E-04 |
| RP11-1023L17.1 | 119 | -1.32 | 1.36E-02 | 4.55E-02 |
| ANTXR1 | 292 | -1.32 | 4.11E-04 | 2.25E-03 |
| KIAA1244 | 4891 | -1.32 | 1.47E-12 | 3.22E-11 |
| NCOA2 | 2828 | -1.32 | 4.17E-11 | 7.66E-10 |
| WNK2 | 266 | -1.32 | 2.03E-03 | 9.09E-03 |
| NEDD9 | 315 | -1.32 | 2.58E-04 | 1.49E-03 |
| MTMR10 | 351 | -1.32 | 1.97E-04 | 1.17E-03 |
| NCAPD3 | 1526 | -1.32 | 4.36E-10 | 6.92E-09 |
| EXO1 | 699 | -1.32 | 1.09E-06 | 1.04E-05 |
| SHPRH | 663 | -1.32 | 6.46E-06 | 5.33E-05 |
| XRCC2 | 691 | -1.32 | 1.50E-06 | 1.39E-05 |
| GAB2 | 627 | -1.32 | 5.13E-06 | 4.30E-05 |
| DDX39A | 2224 | -1.32 | 9.73E-11 | 1.70E-09 |
| GABPB1-AS1 | 399 | -1.32 | 1.36E-04 | 8.42E-04 |
| NCAM2 | 2236 | -1.32 | 2.45E-10 | 4.00E-09 |
| PRKD3 | 1352 | -1.32 | 6.24E-09 | 8.49E-08 |
| EFHC1 | 595 | -1.32 | 1.01E-05 | 8.01E-05 |
| ARHGEF34P | 137 | -1.32 | 7.40E-03 | 2.73E-02 |
| AIFM1 | 2417 | -1.32 | 6.73E-12 | 1.37E-10 |
| DTYMK | 798 | -1.32 | 1.03E-05 | 8.12E-05 |
| USP1 | 1695 | -1.32 | 9.94E-09 | 1.31E-07 |
| LYSMD2 | 667 | -1.32 | 2.33E-06 | 2.10E-05 |
| SEPHS1 | 2968 | -1.32 | 2.01E-11 | 3.84E-10 |
| SCD | 50015 | -1.32 | 2.12E-14 | 5.50E-13 |
| CAPN5 | 153 | -1.32 | 6.28E-03 | 2.37E-02 |
| GPR126 | 3876 | -1.32 | 1.42E-12 | 3.14E-11 |
| MBTPS1 | 7311 | -1.32 | 5.55E-16 | 1.70E-14 |
| PAFAH1B3 | 606 | -1.32 | 2.71E-04 | 1.55E-03 |
| CCSER1 | 270 | -1.31 | 9.58E-04 | 4.72E-03 |
| ZNF766 | 451 | -1.31 | 1.30E-04 | 8.08E-04 |
| ZNF121 | 308 | -1.31 | 4.77E-04 | 2.56E-03 |
| AKT2 | 3040 | -1.31 | 1.18E-08 | 1.55E-07 |
| CDKN2C | 448 | -1.31 | 5.15E-05 | 3.53E-04 |
| RMND1 | 3273 | -1.31 | 3.04E-12 | 6.39E-11 |
| TPR | 5705 | -1.31 | 8.87E-13 | 2.00E-11 |
| TMTC4 | 504 | -1.31 | 3.60E-05 | 2.55E-04 |
| CDC25B | 2568 | -1.31 | 6.20E-10 | 9.64E-09 |
| BCORL1 | 382 | -1.31 | 2.16E-04 | 1.27E-03 |
| USP51 | 128 | -1.31 | 1.40E-02 | 4.66E-02 |
| SRGAP2 | 2227 | -1.31 | 1.30E-09 | 1.91E-08 |
| POLA2 | 1469 | -1.31 | 1.10E-09 | 1.65E-08 |
| UCK2 | 1554 | -1.31 | 3.19E-09 | 4.48E-08 |
| AC004381.6 | 443 | -1.31 | 6.04E-05 | 4.08E-04 |
| LIN54 | 999 | -1.31 | 1.70E-07 | 1.85E-06 |
| AMER1 | 285 | -1.31 | 8.37E-04 | 4.20E-03 |
| LINC00152 | 233 | -1.31 | 1.34E-03 | 6.33E-03 |
| CLMN | 2084 | -1.31 | 1.17E-08 | 1.55E-07 |
| PBX3 | 622 | -1.31 | 4.46E-06 | 3.80E-05 |
| TTC21B | 389 | -1.31 | 1.60E-04 | 9.70E-04 |
| MYO5C | 6245 | -1.31 | 2.42E-11 | 4.62E-10 |
| FAM227B | 241 | -1.31 | 1.69E-03 | 7.76E-03 |
| WDHD1 | 1283 | -1.31 | 9.09E-08 | 1.03E-06 |
| SYT1 | 203 | -1.31 | 4.02E-03 | 1.63E-02 |
| LMNB1 | 3945 | -1.31 | 2.39E-13 | 5.64E-12 |
| MAML3 | 406 | -1.31 | 1.08E-04 | 6.85E-04 |
| TPD52L1 | 1555 | -1.31 | 9.60E-10 | 1.45E-08 |
| SLC25A26 | 287 | -1.31 | 6.71E-04 | 3.46E-03 |
| HADH | 1903 | -1.31 | 1.41E-10 | 2.38E-09 |
| TMEM178B | 491 | -1.31 | 3.87E-05 | 2.72E-04 |
| THOC2 | 3552 | -1.31 | 8.28E-11 | 1.46E-09 |
| CENPW | 301 | -1.31 | 4.46E-04 | 2.41E-03 |
| HACE1 | 288 | -1.31 | 1.27E-03 | 6.04E-03 |
| PAF1 | 1990 | -1.31 | 3.59E-10 | 5.76E-09 |
| PTAR1 | 963 | -1.31 | 1.05E-06 | 1.01E-05 |
| HELLS | 1326 | -1.31 | 4.04E-08 | 4.90E-07 |
| ZNF551 | 307 | -1.31 | 6.49E-04 | 3.35E-03 |
| MYC | 1290 | -1.31 | 5.43E-08 | 6.41E-07 |
| MCTS1 | 911 | -1.31 | 3.01E-06 | 2.64E-05 |
| DHFRL1 | 356 | -1.31 | 4.68E-04 | 2.52E-03 |
| XRCC1 | 737 | -1.31 | 1.17E-05 | 9.14E-05 |
| CLEC3A | 319 | -1.30 | 5.48E-04 | 2.89E-03 |
| RNASEH2A | 1389 | -1.30 | 4.36E-09 | 6.05E-08 |
| ALDH9A1 | 1690 | -1.30 | 1.23E-09 | 1.82E-08 |
| POLE2 | 760 | -1.30 | 7.39E-06 | 6.02E-05 |
| HMBOX1 | 258 | -1.30 | 1.76E-03 | 8.04E-03 |
| IL27RA | 291 | -1.30 | 1.10E-03 | 5.32E-03 |
| LYPD6 | 360 | -1.30 | 2.99E-04 | 1.70E-03 |
| RPL13A | 23853 | -1.30 | 2.48E-11 | 4.73E-10 |
| SATB2 | 437 | -1.30 | 8.85E-05 | 5.76E-04 |
| RPL18 | 7784 | -1.30 | 8.69E-07 | 8.47E-06 |
| TRIM2 | 456 | -1.30 | 8.11E-05 | 5.34E-04 |
| P2RY2 | 459 | -1.30 | 8.55E-05 | 5.59E-04 |
| TMEM185A | 850 | -1.30 | 9.88E-07 | 9.52E-06 |
| ZSWIM5 | 440 | -1.30 | 1.64E-04 | 9.93E-04 |
| NUAK1 | 1036 | -1.30 | 2.35E-07 | 2.50E-06 |
| DIEXF | 472 | -1.30 | 7.33E-05 | 4.87E-04 |
| C19orf54 | 328 | -1.30 | 7.17E-04 | 3.66E-03 |
| SGOL2 | 879 | -1.30 | 6.00E-07 | 6.03E-06 |
| RMI2 | 1429 | -1.30 | 1.13E-07 | 1.27E-06 |
| SERTAD4 | 773 | -1.30 | 8.08E-06 | 6.53E-05 |
| ACER2 | 180 | -1.30 | 6.09E-03 | 2.31E-02 |
| PNRC2 | 1908 | -1.30 | 7.52E-10 | 1.15E-08 |
| CGNL1 | 209 | -1.30 | 2.80E-03 | 1.20E-02 |
| USF2 | 1955 | -1.30 | 9.52E-09 | 1.26E-07 |
| NCAPG2 | 3729 | -1.30 | 9.12E-12 | 1.82E-10 |
| HIST2H2AA3 | 149 | -1.30 | 1.02E-02 | 3.55E-02 |
| USPL1 | 431 | -1.30 | 1.34E-04 | 8.29E-04 |
| RACGAP1 | 3659 | -1.30 | 4.69E-11 | 8.54E-10 |
| SP6 | 134 | -1.30 | 1.31E-02 | 4.40E-02 |
| CEP192 | 1183 | -1.30 | 3.79E-08 | 4.61E-07 |
| TFAP4 | 364 | -1.30 | 7.89E-04 | 3.98E-03 |
| MED13L | 5229 | -1.30 | 6.35E-09 | 8.62E-08 |
| FZD1 | 423 | -1.30 | 1.29E-04 | 8.07E-04 |
| CCDC77 | 179 | -1.30 | 5.84E-03 | 2.24E-02 |
| GBAS | 868 | -1.30 | 2.13E-06 | 1.93E-05 |
| CXorf40A | 601 | -1.30 | 1.34E-05 | 1.03E-04 |
| HMGN2 | 15437 | -1.30 | 7.11E-17 | 2.38E-15 |
| C6orf120 | 939 | -1.30 | 9.03E-07 | 8.78E-06 |
| PHLDA1 | 281 | -1.30 | 1.51E-03 | 7.04E-03 |
| USP37 | 867 | -1.29 | 1.48E-05 | 1.14E-04 |
| SULT2B1 | 611 | -1.29 | 2.82E-04 | 1.61E-03 |
| ARL5B | 1026 | -1.29 | 4.45E-07 | 4.55E-06 |
| TSHZ1 | 468 | -1.29 | 1.19E-04 | 7.51E-04 |
| CCDC50 | 904 | -1.29 | 1.96E-06 | 1.79E-05 |
| MOCOS | 375 | -1.29 | 5.91E-04 | 3.08E-03 |
| SASS6 | 271 | -1.29 | 1.29E-03 | 6.13E-03 |
| RRM1 | 3142 | -1.29 | 6.79E-11 | 1.22E-09 |
| PRPH | 134 | -1.29 | 1.49E-02 | 4.89E-02 |
| ZBTB37 | 1461 | -1.29 | 1.08E-06 | 1.03E-05 |
| ARHGEF10L | 298 | -1.29 | 2.33E-03 | 1.02E-02 |
| ZBTB44 | 1033 | -1.29 | 1.98E-06 | 1.80E-05 |
| SPC24 | 718 | -1.29 | 3.87E-05 | 2.72E-04 |
| PHIP | 2067 | -1.29 | 2.27E-07 | 2.42E-06 |
| IRF2BP1 | 355 | -1.29 | 7.19E-03 | 2.66E-02 |
| DDX12P | 170 | -1.29 | 8.43E-03 | 3.05E-02 |
| FIGNL1 | 714 | -1.29 | 8.10E-06 | 6.54E-05 |
| RP5-991G20.4 | 231 | -1.29 | 2.69E-03 | 1.16E-02 |
| PHGDH | 2055 | -1.29 | 2.54E-07 | 2.68E-06 |
| DRAM1 | 2189 | -1.29 | 2.41E-09 | 3.46E-08 |
| PGRMC1 | 2930 | -1.29 | 2.42E-11 | 4.62E-10 |
| DTWD1 | 886 | -1.29 | 1.95E-06 | 1.78E-05 |
| PTPDC1 | 280 | -1.29 | 1.52E-03 | 7.06E-03 |
| NFKBIB | 393 | -1.29 | 5.12E-04 | 2.72E-03 |
| REPS1 | 1075 | -1.29 | 9.51E-07 | 9.21E-06 |
| ARHGEF28 | 317 | -1.29 | 8.69E-04 | 4.35E-03 |
| PRKAR2B | 823 | -1.29 | 3.89E-06 | 3.34E-05 |
| NUP210 | 7348 | -1.29 | 1.32E-12 | 2.93E-11 |
| PLAGL1 | 292 | -1.29 | 1.28E-03 | 6.07E-03 |
| SF3B3 | 7894 | -1.29 | 1.03E-11 | 2.04E-10 |
| RP11-46C24.7 | 170 | -1.29 | 9.13E-03 | 3.26E-02 |
| PHF19 | 1266 | -1.29 | 1.10E-07 | 1.23E-06 |
| INSR | 436 | -1.29 | 3.30E-04 | 1.85E-03 |
| SPATA13 | 835 | -1.29 | 4.56E-06 | 3.88E-05 |
| UACA | 786 | -1.29 | 7.37E-06 | 6.01E-05 |
| SPIN3 | 252 | -1.29 | 3.55E-03 | 1.47E-02 |
| CHML | 901 | -1.29 | 8.12E-06 | 6.56E-05 |
| TMEM140 | 207 | -1.29 | 9.46E-03 | 3.35E-02 |
| MCM4 | 9386 | -1.28 | 5.46E-14 | 1.37E-12 |
| CCDC97 | 649 | -1.28 | 9.79E-05 | 6.31E-04 |
| BRI3BP | 5867 | -1.28 | 6.11E-13 | 1.39E-11 |
| ERCC6L2 | 696 | -1.28 | 3.48E-05 | 2.47E-04 |
| PRKDC | 13710 | -1.28 | 2.03E-08 | 2.57E-07 |
| ZWILCH | 1193 | -1.28 | 1.39E-07 | 1.53E-06 |
| ABLIM3 | 414 | -1.28 | 2.73E-04 | 1.56E-03 |
| GLTSCR2 | 1636 | -1.28 | 1.15E-04 | 7.27E-04 |
| OXR1 | 1692 | -1.28 | 7.58E-08 | 8.77E-07 |
| PIK3CA | 803 | -1.28 | 1.06E-05 | 8.32E-05 |
| ACBD7 | 301 | -1.28 | 1.17E-03 | 5.59E-03 |
| ARMC7 | 573 | -1.28 | 7.01E-05 | 4.67E-04 |
| SLC16A7 | 208 | -1.28 | 5.67E-03 | 2.18E-02 |
| RAD18 | 1149 | -1.28 | 2.43E-07 | 2.57E-06 |
| DUT | 1222 | -1.28 | 1.18E-07 | 1.32E-06 |
| USP31 | 531 | -1.28 | 1.25E-04 | 7.84E-04 |
| PHC1 | 348 | -1.28 | 9.17E-04 | 4.54E-03 |
| LRCH1 | 466 | -1.28 | 2.45E-04 | 1.42E-03 |
| RPS27L | 1152 | -1.28 | 1.61E-06 | 1.49E-05 |
| FANCG | 1163 | -1.28 | 1.48E-06 | 1.38E-05 |
| KIAA1009 | 178 | -1.28 | 1.21E-02 | 4.12E-02 |
| HAUS8 | 415 | -1.28 | 1.00E-03 | 4.88E-03 |
| KRT222 | 184 | -1.28 | 9.20E-03 | 3.27E-02 |
| TIMM50 | 1148 | -1.28 | 6.97E-07 | 6.93E-06 |
| KIAA1958 | 505 | -1.28 | 1.08E-04 | 6.88E-04 |
| PTMA | 20861 | -1.28 | 7.69E-11 | 1.37E-09 |
| VDR | 1051 | -1.28 | 9.59E-07 | 9.28E-06 |
| ARMCX6 | 424 | -1.28 | 3.92E-04 | 2.16E-03 |
| SKP2 | 750 | -1.28 | 1.27E-05 | 9.82E-05 |
| TRAPPC6A | 454 | -1.28 | 1.39E-03 | 6.52E-03 |
| ZNF678 | 248 | -1.28 | 4.68E-03 | 1.85E-02 |
| CKS1B | 2369 | -1.28 | 2.56E-09 | 3.67E-08 |
| E2F2 | 601 | -1.28 | 1.43E-04 | 8.80E-04 |
| QPCTL | 288 | -1.28 | 2.78E-03 | 1.19E-02 |
| RTTN | 291 | -1.28 | 2.19E-03 | 9.69E-03 |
| WHSC1 | 5549 | -1.28 | 6.34E-12 | 1.30E-10 |
| BACE2 | 695 | -1.28 | 2.90E-05 | 2.10E-04 |
| PANK3 | 3721 | -1.28 | 5.00E-09 | 6.88E-08 |
| ULK2 | 978 | -1.28 | 2.47E-06 | 2.21E-05 |
| NAB1 | 727 | -1.27 | 7.31E-05 | 4.85E-04 |
| ATF5 | 846 | -1.27 | 6.51E-05 | 4.36E-04 |
| UNC5B | 175 | -1.27 | 1.28E-02 | 4.32E-02 |
| SERINC5 | 250 | -1.27 | 3.37E-03 | 1.40E-02 |
| MCM2 | 4971 | -1.27 | 9.64E-10 | 1.45E-08 |
| RAPGEF5 | 157 | -1.27 | 1.51E-02 | 4.93E-02 |
| MYO19 | 1440 | -1.27 | 1.01E-07 | 1.14E-06 |
| SMC1A | 7145 | -1.27 | 6.92E-11 | 1.24E-09 |
| ZNF589 | 221 | -1.27 | 4.90E-03 | 1.92E-02 |
| SHMT1 | 1456 | -1.27 | 1.04E-07 | 1.17E-06 |
| IRX5 | 687 | -1.27 | 3.62E-05 | 2.56E-04 |
| ZNF765 | 500 | -1.27 | 3.16E-04 | 1.78E-03 |
| CCNF | 1391 | -1.27 | 3.97E-07 | 4.08E-06 |
| ATP13A3 | 3427 | -1.27 | 3.40E-08 | 4.17E-07 |
| NAT8L | 266 | -1.27 | 1.39E-02 | 4.62E-02 |
| RAD51 | 503 | -1.27 | 2.52E-04 | 1.46E-03 |
| SMC3 | 2491 | -1.27 | 4.36E-08 | 5.24E-07 |
| TMEM154 | 215 | -1.27 | 6.75E-03 | 2.52E-02 |
| OSGIN2 | 2232 | -1.27 | 2.57E-08 | 3.20E-07 |
| C4orf46 | 500 | -1.27 | 2.32E-04 | 1.36E-03 |
| FAM115C | 220 | -1.27 | 7.58E-03 | 2.79E-02 |
| MIS18BP1 | 2521 | -1.27 | 8.03E-09 | 1.08E-07 |
| SPPL2A | 3048 | -1.27 | 2.37E-08 | 2.97E-07 |
| MPDZ | 477 | -1.27 | 2.67E-04 | 1.54E-03 |
| TMOD2 | 956 | -1.27 | 1.10E-05 | 8.59E-05 |
| GSK3A | 1004 | -1.27 | 6.32E-06 | 5.22E-05 |
| FGD5-AS1 | 10534 | -1.27 | 6.78E-14 | 1.68E-12 |
| GINS1 | 2017 | -1.27 | 1.22E-07 | 1.36E-06 |
| RAD54L | 473 | -1.27 | 6.48E-04 | 3.35E-03 |
| ADRBK2 | 267 | -1.27 | 3.42E-03 | 1.42E-02 |
| RAP2A | 636 | -1.27 | 4.09E-05 | 2.86E-04 |
| GUCY1A2 | 318 | -1.27 | 3.44E-03 | 1.43E-02 |
| ECT2 | 4243 | -1.27 | 6.47E-10 | 1.00E-08 |
| ABCC4 | 201 | -1.27 | 9.68E-03 | 3.41E-02 |
| ESR1 | 21277 | -1.27 | 4.65E-11 | 8.50E-10 |
| UHRF2 | 578 | -1.27 | 1.37E-04 | 8.47E-04 |
| FEN1 | 2083 | -1.27 | 1.97E-08 | 2.50E-07 |
| FAM98C | 425 | -1.27 | 1.24E-03 | 5.92E-03 |
| BRCA1 | 2186 | -1.27 | 1.30E-08 | 1.69E-07 |
| QSER1 | 1723 | -1.27 | 9.39E-07 | 9.11E-06 |
| MIS18A | 452 | -1.27 | 6.88E-04 | 3.54E-03 |
| FAM129B | 2994 | -1.27 | 8.27E-06 | 6.66E-05 |
| PSMD8 | 3277 | -1.26 | 1.88E-09 | 2.74E-08 |
| SYMPK | 1456 | -1.26 | 2.39E-06 | 2.15E-05 |
| MED29 | 1401 | -1.26 | 4.73E-07 | 4.83E-06 |
| SEMA3F | 758 | -1.26 | 1.76E-04 | 1.06E-03 |
| BLOC1S3 | 376 | -1.26 | 1.15E-03 | 5.51E-03 |
| AP3M2 | 465 | -1.26 | 5.56E-04 | 2.92E-03 |
| ANKRD50 | 1904 | -1.26 | 1.31E-07 | 1.45E-06 |
| ZNRF2 | 406 | -1.26 | 7.87E-04 | 3.98E-03 |
| GRAMD1A | 833 | -1.26 | 1.72E-04 | 1.04E-03 |
| MB | 559 | -1.26 | 2.57E-04 | 1.49E-03 |
| PNKP | 461 | -1.26 | 4.77E-03 | 1.88E-02 |
| RIF1 | 2515 | -1.26 | 5.05E-06 | 4.25E-05 |
| PAPOLG | 465 | -1.26 | 5.80E-04 | 3.04E-03 |
| DEF6 | 195 | -1.26 | 1.15E-02 | 3.95E-02 |
| SLC1A5 | 4429 | -1.26 | 1.69E-09 | 2.47E-08 |
| OSBPL8 | 2417 | -1.26 | 2.92E-08 | 3.62E-07 |
| PKN3 | 381 | -1.26 | 2.75E-03 | 1.18E-02 |
| MCM3 | 5415 | -1.26 | 6.09E-11 | 1.10E-09 |
| C2CD5 | 1315 | -1.26 | 3.99E-06 | 3.43E-05 |
| HECTD2 | 396 | -1.26 | 1.22E-03 | 5.83E-03 |
| PLBD1 | 338 | -1.26 | 2.04E-03 | 9.14E-03 |
| CNOT6L | 1145 | -1.26 | 2.73E-06 | 2.43E-05 |
| LCLAT1 | 982 | -1.26 | 8.80E-06 | 7.05E-05 |
| PARPBP | 596 | -1.26 | 2.71E-04 | 1.56E-03 |
| PRMT1 | 3274 | -1.26 | 6.34E-08 | 7.40E-07 |
| ELOVL5 | 1795 | -1.26 | 1.63E-07 | 1.78E-06 |
| OTUD6B | 1195 | -1.26 | 3.87E-06 | 3.33E-05 |
| FAM155B | 327 | -1.26 | 2.55E-03 | 1.11E-02 |
| TNRC6C | 1658 | -1.26 | 1.26E-06 | 1.19E-05 |
| SLC37A4 | 1151 | -1.26 | 1.38E-06 | 1.29E-05 |
| SALL4 | 481 | -1.26 | 5.54E-04 | 2.92E-03 |
| NFATC2 | 3163 | -1.26 | 3.01E-09 | 4.24E-08 |
| DNMT1 | 5649 | -1.26 | 5.04E-10 | 7.92E-09 |
| TK1 | 4282 | -1.26 | 9.15E-06 | 7.31E-05 |
| GLCCI1 | 658 | -1.26 | 9.85E-05 | 6.34E-04 |
| ZBTB39 | 443 | -1.26 | 5.35E-04 | 2.83E-03 |
| FANCE | 312 | -1.26 | 2.38E-03 | 1.04E-02 |
| SUV420H2 | 364 | -1.26 | 5.89E-03 | 2.25E-02 |
| ZNF619 | 284 | -1.26 | 3.51E-03 | 1.46E-02 |
| LSM14A | 3243 | -1.26 | 1.01E-09 | 1.52E-08 |
| KPNA2 | 11392 | -1.26 | 2.77E-11 | 5.24E-10 |
| SHROOM3 | 1557 | -1.26 | 8.31E-07 | 8.11E-06 |
| HOOK1 | 1093 | -1.26 | 2.20E-06 | 1.99E-05 |
| KATNA1 | 513 | -1.26 | 3.69E-04 | 2.04E-03 |
| BZW2 | 3032 | -1.26 | 3.29E-09 | 4.62E-08 |
| PM20D2 | 809 | -1.26 | 2.33E-05 | 1.72E-04 |
| MATN2 | 580 | -1.26 | 2.48E-04 | 1.44E-03 |
| FANCM | 831 | -1.26 | 2.23E-05 | 1.65E-04 |
| MYO5B | 1617 | -1.26 | 1.70E-07 | 1.85E-06 |
| SCN8A | 264 | -1.26 | 4.85E-03 | 1.91E-02 |
| NUP160 | 3256 | -1.26 | 3.10E-09 | 4.36E-08 |
| SESTD1 | 582 | -1.26 | 1.62E-04 | 9.83E-04 |
| NPTXR | 1121 | -1.26 | 4.08E-06 | 3.50E-05 |
| SSX2IP | 641 | -1.26 | 2.43E-04 | 1.41E-03 |
| IRS2 | 972 | -1.26 | 3.22E-05 | 2.31E-04 |
| SCLT1 | 220 | -1.26 | 1.02E-02 | 3.55E-02 |
| TRIP13 | 755 | -1.26 | 3.90E-05 | 2.74E-04 |
| PTOV1-AS1 | 196 | -1.26 | 1.30E-02 | 4.38E-02 |
| CPSF1 | 1840 | -1.25 | 5.42E-05 | 3.69E-04 |
| TBCB | 1007 | -1.25 | 2.80E-05 | 2.04E-04 |
| ZNF518A | 486 | -1.25 | 4.82E-04 | 2.58E-03 |
| PHF6 | 2046 | -1.25 | 7.69E-08 | 8.88E-07 |
| RPS19 | 12395 | -1.25 | 1.36E-08 | 1.76E-07 |
| STAG1 | 1937 | -1.25 | 1.79E-07 | 1.93E-06 |
| CYB5R4 | 632 | -1.25 | 1.10E-04 | 6.95E-04 |
| ZNF623 | 972 | -1.25 | 3.59E-05 | 2.55E-04 |
| KMT2B | 1200 | -1.25 | 1.09E-04 | 6.92E-04 |
| ITPR3 | 3499 | -1.25 | 2.57E-07 | 2.70E-06 |
| CEP44 | 318 | -1.25 | 4.68E-03 | 1.85E-02 |
| MADD | 4498 | -1.25 | 1.29E-10 | 2.19E-09 |
| CKAP5 | 7498 | -1.25 | 1.13E-09 | 1.68E-08 |
| CLCN5 | 240 | -1.25 | 9.16E-03 | 3.27E-02 |
| RPP14 | 499 | -1.25 | 4.38E-04 | 2.38E-03 |
| HNRNPH3 | 3223 | -1.25 | 2.05E-08 | 2.60E-07 |
| C11orf82 | 936 | -1.25 | 1.77E-05 | 1.33E-04 |
| CDC20 | 1133 | -1.25 | 5.10E-06 | 4.28E-05 |
| TPX2 | 4332 | -1.25 | 1.96E-09 | 2.85E-08 |
| NUP85 | 1952 | -1.25 | 1.47E-07 | 1.61E-06 |
| ZNF107 | 966 | -1.25 | 1.93E-05 | 1.44E-04 |
| TAF5 | 228 | -1.25 | 9.03E-03 | 3.23E-02 |
| SFT2D2 | 930 | -1.25 | 8.76E-04 | 4.37E-03 |
| TACC3 | 1735 | -1.25 | 4.69E-05 | 3.24E-04 |
| SH3KBP1 | 513 | -1.25 | 6.88E-04 | 3.54E-03 |
| PPP1R12B | 1274 | -1.25 | 2.09E-06 | 1.89E-05 |
| KATNAL1 | 252 | -1.25 | 8.96E-03 | 3.21E-02 |
| RBM12 | 2327 | -1.25 | 1.72E-07 | 1.87E-06 |
| CEP250 | 903 | -1.25 | 3.76E-05 | 2.65E-04 |
| FANCL | 382 | -1.25 | 1.48E-03 | 6.93E-03 |
| EDN1 | 299 | -1.25 | 3.91E-03 | 1.59E-02 |
| SPTBN1 | 2831 | -1.25 | 5.61E-08 | 6.61E-07 |
| CNNM4 | 1076 | -1.25 | 5.01E-06 | 4.23E-05 |
| KLHL23 | 498 | -1.25 | 9.64E-04 | 4.74E-03 |
| TMEM251 | 592 | -1.25 | 3.79E-04 | 2.09E-03 |
| VOPP1 | 1178 | -1.25 | 5.18E-06 | 4.34E-05 |
| TXNDC16 | 638 | -1.25 | 3.67E-04 | 2.04E-03 |
| SCML1 | 831 | -1.25 | 5.29E-05 | 3.62E-04 |
| CEP76 | 305 | -1.25 | 4.03E-03 | 1.63E-02 |
| RAI2 | 721 | -1.25 | 8.85E-05 | 5.76E-04 |
| SDHAF1 | 221 | -1.25 | 1.47E-02 | 4.83E-02 |
| CBX5 | 8114 | -1.25 | 5.55E-08 | 6.54E-07 |
| SUV39H1 | 258 | -1.25 | 8.60E-03 | 3.10E-02 |
| MKL2 | 2260 | -1.25 | 5.08E-06 | 4.27E-05 |
| CD55 | 1220 | -1.25 | 6.81E-06 | 5.59E-05 |
| ZNF600 | 217 | -1.25 | 1.50E-02 | 4.91E-02 |
| FAM136A | 2374 | -1.25 | 9.49E-08 | 1.08E-06 |
| IRF1 | 314 | -1.25 | 7.65E-03 | 2.81E-02 |
| COQ7 | 613 | -1.24 | 2.37E-04 | 1.38E-03 |
| C7orf49 | 436 | -1.24 | 1.49E-03 | 6.96E-03 |
| PLCH1 | 545 | -1.24 | 5.55E-04 | 2.92E-03 |
| MDM4 | 1544 | -1.24 | 3.75E-04 | 2.07E-03 |
| RFC5 | 2253 | -1.24 | 5.67E-07 | 5.71E-06 |
| MTHFD1L | 1039 | -1.24 | 1.70E-05 | 1.29E-04 |
| TAF1 | 2091 | -1.24 | 2.83E-07 | 2.97E-06 |
| SLC41A3 | 1016 | -1.24 | 1.40E-05 | 1.07E-04 |
| AIF1L | 4214 | -1.24 | 4.04E-09 | 5.63E-08 |
| ALG6 | 447 | -1.24 | 1.95E-03 | 8.77E-03 |
| TMEM44 | 286 | -1.24 | 5.78E-03 | 2.22E-02 |
| GPR125 | 733 | -1.24 | 9.94E-05 | 6.38E-04 |
| LENG8 | 653 | -1.24 | 3.08E-03 | 1.30E-02 |
| TBC1D15 | 872 | -1.24 | 4.66E-05 | 3.23E-04 |
| TUBB | 23004 | -1.24 | 4.10E-11 | 7.54E-10 |
| ARHGAP32 | 1824 | -1.24 | 1.57E-05 | 1.20E-04 |
| ILF3-AS1 | 684 | -1.24 | 5.45E-04 | 2.88E-03 |
| YPEL2 | 628 | -1.24 | 5.43E-04 | 2.86E-03 |
| TMA7 | 348 | -1.24 | 4.29E-03 | 1.72E-02 |
| ALMS1 | 1241 | -1.24 | 5.33E-05 | 3.64E-04 |
| RBMXL1 | 371 | -1.24 | 2.08E-03 | 9.26E-03 |
| GALNT7 | 1814 | -1.24 | 2.38E-06 | 2.14E-05 |
| FOXN2 | 460 | -1.24 | 2.21E-03 | 9.75E-03 |
| AURKA | 4829 | -1.24 | 3.65E-09 | 5.11E-08 |
| RFC4 | 772 | -1.24 | 1.33E-04 | 8.24E-04 |
| NCOA7 | 416 | -1.24 | 1.70E-03 | 7.81E-03 |
| SIK1 | 823 | -1.24 | 3.46E-04 | 1.93E-03 |
| CACNA1D | 1805 | -1.24 | 1.24E-06 | 1.17E-05 |
| GINS2 | 2573 | -1.24 | 4.05E-08 | 4.91E-07 |
| SHQ1 | 541 | -1.24 | 8.30E-04 | 4.17E-03 |
| CDC25A | 485 | -1.24 | 1.78E-03 | 8.13E-03 |
| GINS4 | 299 | -1.24 | 5.60E-03 | 2.16E-02 |
| PRKAR2A | 1377 | -1.24 | 4.19E-06 | 3.59E-05 |
| AADAT | 269 | -1.24 | 9.38E-03 | 3.33E-02 |
| SFMBT1 | 703 | -1.24 | 2.05E-04 | 1.21E-03 |
| C18orf21 | 283 | -1.24 | 6.86E-03 | 2.56E-02 |
| TSPYL2 | 300 | -1.24 | 7.36E-03 | 2.72E-02 |
| ARHGAP44 | 220 | -1.24 | 1.43E-02 | 4.74E-02 |
| CAD | 3772 | -1.24 | 4.29E-08 | 5.17E-07 |
| MDC1 | 1657 | -1.24 | 6.32E-07 | 6.31E-06 |
| RP11-196G18.22 | 1611 | -1.24 | 1.20E-05 | 9.34E-05 |
| FAM175A | 261 | -1.24 | 8.00E-03 | 2.92E-02 |
| MRE11A | 666 | -1.24 | 6.43E-04 | 3.33E-03 |
| CENPU | 1199 | -1.24 | 1.09E-05 | 8.54E-05 |
| HNRNPL | 4153 | -1.24 | 2.63E-09 | 3.75E-08 |
| NR3C1 | 4146 | -1.24 | 8.19E-08 | 9.37E-07 |
| ARHGEF35 | 227 | -1.24 | 1.42E-02 | 4.71E-02 |
| PRIMPOL | 236 | -1.24 | 1.31E-02 | 4.41E-02 |
| LYST | 318 | -1.24 | 8.52E-03 | 3.08E-02 |
| ABTB2 | 538 | -1.24 | 1.29E-03 | 6.11E-03 |
| CCNG1 | 1135 | -1.24 | 3.51E-05 | 2.50E-04 |
| CNNM3 | 899 | -1.24 | 6.07E-05 | 4.10E-04 |
| ADPRHL1 | 379 | -1.24 | 8.36E-03 | 3.03E-02 |
| SEPSECS | 611 | -1.23 | 4.37E-04 | 2.37E-03 |
| EXOG | 337 | -1.23 | 5.99E-03 | 2.28E-02 |
| TBP | 530 | -1.23 | 7.26E-04 | 3.71E-03 |
| POLD3 | 978 | -1.23 | 4.55E-05 | 3.15E-04 |
| FGFR1 | 1189 | -1.23 | 1.39E-05 | 1.07E-04 |
| SMARCA2 | 1915 | -1.23 | 1.40E-06 | 1.31E-05 |
| RP11-196G18.23 | 441 | -1.23 | 1.88E-03 | 8.52E-03 |
| MCM6 | 4591 | -1.23 | 9.14E-09 | 1.22E-07 |
| DHFR | 3151 | -1.23 | 1.56E-07 | 1.70E-06 |
| TRIM59 | 442 | -1.23 | 3.81E-03 | 1.56E-02 |
| MSH6 | 3639 | -1.23 | 4.32E-07 | 4.42E-06 |
| RNF169 | 687 | -1.23 | 1.89E-03 | 8.57E-03 |
| PSRC1 | 1094 | -1.23 | 3.13E-05 | 2.25E-04 |
| HYLS1 | 320 | -1.23 | 6.21E-03 | 2.35E-02 |
| HNRNPAB | 8240 | -1.23 | 2.64E-10 | 4.29E-09 |
| SMS | 2031 | -1.23 | 1.23E-06 | 1.17E-05 |
| CDKN2AIPNL | 575 | -1.23 | 7.68E-04 | 3.90E-03 |
| ARFGEF1 | 2611 | -1.23 | 6.54E-07 | 6.54E-06 |
| APBB2 | 2694 | -1.23 | 1.54E-06 | 1.43E-05 |
| NDC1 | 1208 | -1.23 | 1.22E-05 | 9.51E-05 |
| RTKN2 | 449 | -1.23 | 1.48E-03 | 6.91E-03 |
| ATP8A1 | 1102 | -1.23 | 2.55E-05 | 1.87E-04 |
| G2E3 | 569 | -1.23 | 9.96E-04 | 4.87E-03 |
| TMEM184C | 1726 | -1.23 | 8.42E-06 | 6.77E-05 |
| NDE1 | 762 | -1.23 | 3.18E-04 | 1.79E-03 |
| NASP | 2455 | -1.23 | 2.58E-07 | 2.71E-06 |
| TMEM254 | 1126 | -1.23 | 1.55E-05 | 1.18E-04 |
| REV3L | 2349 | -1.23 | 9.60E-06 | 7.63E-05 |
| CTD-2619J13.14 | 491 | -1.23 | 1.92E-03 | 8.66E-03 |
| SNRPA | 891 | -1.23 | 4.52E-04 | 2.44E-03 |
| MAN1A2 | 5481 | -1.23 | 5.19E-07 | 5.26E-06 |
| HACL1 | 629 | -1.23 | 5.48E-04 | 2.89E-03 |
| SLC44A1 | 3129 | -1.23 | 6.10E-07 | 6.11E-06 |
| TPP2 | 791 | -1.23 | 2.39E-04 | 1.40E-03 |
| TEP1 | 1096 | -1.23 | 6.17E-05 | 4.15E-04 |
| KSR2 | 748 | -1.23 | 4.62E-04 | 2.49E-03 |
| SLC9A6 | 906 | -1.23 | 1.69E-04 | 1.02E-03 |
| ATAD2B | 1477 | -1.23 | 4.04E-05 | 2.84E-04 |
| PARD3 | 1715 | -1.23 | 2.13E-06 | 1.93E-05 |
| NSMCE4A | 718 | -1.23 | 3.00E-04 | 1.70E-03 |
| NHLRC2 | 923 | -1.23 | 1.54E-04 | 9.40E-04 |
| ZNF526 | 304 | -1.23 | 8.40E-03 | 3.04E-02 |
| DEK | 4795 | -1.23 | 6.13E-08 | 7.18E-07 |
| FOXN3 | 1301 | -1.23 | 2.04E-05 | 1.52E-04 |
| ORC6 | 556 | -1.23 | 8.12E-04 | 4.09E-03 |
| CD47 | 3393 | -1.23 | 4.22E-08 | 5.10E-07 |
| SSBP3 | 660 | -1.23 | 8.11E-04 | 4.09E-03 |
| RABGAP1L | 765 | -1.23 | 3.03E-04 | 1.71E-03 |
| IKZF5 | 422 | -1.23 | 3.33E-03 | 1.39E-02 |
| MAP7D3 | 566 | -1.23 | 9.82E-04 | 4.81E-03 |
| OSGEP | 448 | -1.23 | 3.03E-03 | 1.28E-02 |
| PUM2 | 6164 | -1.23 | 1.21E-08 | 1.59E-07 |
| DOPEY2 | 2079 | -1.23 | 1.63E-06 | 1.51E-05 |
| MAPK6 | 4788 | -1.23 | 1.40E-08 | 1.82E-07 |
| ITSN1 | 570 | -1.23 | 1.17E-03 | 5.61E-03 |
| FBXO30 | 411 | -1.23 | 3.80E-03 | 1.55E-02 |
| OCRL | 1322 | -1.23 | 8.82E-06 | 7.06E-05 |
| KLF11 | 632 | -1.22 | 6.87E-04 | 3.54E-03 |
| SMC5 | 991 | -1.22 | 1.09E-04 | 6.92E-04 |
| ADCY9 | 812 | -1.22 | 1.99E-04 | 1.18E-03 |
| CHRAC1 | 1002 | -1.22 | 5.00E-05 | 3.44E-04 |
| SHKBP1 | 1131 | -1.22 | 2.63E-03 | 1.14E-02 |
| EXOSC2 | 1017 | -1.22 | 1.30E-04 | 8.09E-04 |
| WDR27 | 446 | -1.22 | 3.30E-03 | 1.38E-02 |
| DHX34 | 385 | -1.22 | 1.20E-02 | 4.08E-02 |
| XPR1 | 1910 | -1.22 | 3.32E-05 | 2.37E-04 |
| SEPN1 | 841 | -1.22 | 2.93E-04 | 1.67E-03 |
| ACTL6A | 1623 | -1.22 | 6.94E-06 | 5.69E-05 |
| NEDD4 | 2612 | -1.22 | 7.70E-07 | 7.59E-06 |
| NANP | 506 | -1.22 | 3.52E-03 | 1.46E-02 |
| ING4 | 417 | -1.22 | 3.20E-03 | 1.34E-02 |
| ZNF267 | 427 | -1.22 | 4.59E-03 | 1.82E-02 |
| HECA | 529 | -1.22 | 1.20E-03 | 5.74E-03 |
| EML2 | 864 | -1.22 | 3.05E-04 | 1.72E-03 |
| TMEM109 | 1522 | -1.22 | 3.07E-05 | 2.22E-04 |
| MPHOSPH9 | 1443 | -1.22 | 2.89E-05 | 2.10E-04 |
| FRMD6 | 884 | -1.22 | 6.27E-04 | 3.25E-03 |
| FAM178A | 2061 | -1.22 | 8.38E-06 | 6.74E-05 |
| MOSPD2 | 438 | -1.22 | 3.69E-03 | 1.52E-02 |
| SNRNP70 | 2009 | -1.22 | 1.51E-04 | 9.25E-04 |
| FAM76B | 371 | -1.22 | 5.97E-03 | 2.28E-02 |
| ZDHHC20 | 1322 | -1.22 | 2.77E-05 | 2.02E-04 |
| PRPS1 | 715 | -1.22 | 5.42E-04 | 2.86E-03 |
| TCOF1 | 1305 | -1.22 | 3.64E-05 | 2.57E-04 |
| C22orf39 | 508 | -1.22 | 3.08E-03 | 1.30E-02 |
| SOGA1 | 3573 | -1.22 | 1.35E-07 | 1.49E-06 |
| NUP155 | 1779 | -1.22 | 3.22E-05 | 2.31E-04 |
| SCML2 | 444 | -1.22 | 3.16E-03 | 1.33E-02 |
| FBXL4 | 732 | -1.22 | 1.32E-03 | 6.22E-03 |
| TRAPPC9 | 952 | -1.22 | 1.80E-04 | 1.08E-03 |
| NFIX | 477 | -1.22 | 3.65E-03 | 1.50E-02 |
| WDSUB1 | 311 | -1.22 | 1.16E-02 | 3.97E-02 |
| C9orf64 | 668 | -1.22 | 5.65E-04 | 2.96E-03 |
| PSMB1 | 5036 | -1.22 | 1.71E-07 | 1.86E-06 |
| ZDHHC6 | 1192 | -1.22 | 4.37E-05 | 3.03E-04 |
| NAA16 | 440 | -1.22 | 6.16E-03 | 2.33E-02 |
| FAM20B | 2660 | -1.22 | 9.17E-06 | 7.31E-05 |
| LYPD3 | 2011 | -1.22 | 8.22E-05 | 5.40E-04 |
| NUP93 | 1035 | -1.22 | 8.71E-05 | 5.68E-04 |
| SNX30 | 1078 | -1.22 | 1.48E-04 | 9.11E-04 |
| RNF168 | 1225 | -1.22 | 1.20E-04 | 7.55E-04 |
| BBS10 | 594 | -1.22 | 2.21E-03 | 9.75E-03 |
| DCK | 624 | -1.22 | 8.32E-04 | 4.18E-03 |
| TMED8 | 2289 | -1.22 | 9.75E-06 | 7.74E-05 |
| EXOC6 | 883 | -1.22 | 4.91E-04 | 2.62E-03 |
| RFC2 | 1972 | -1.22 | 3.05E-06 | 2.68E-05 |
| SLC25A28 | 415 | -1.22 | 4.73E-03 | 1.87E-02 |
| ANLN | 4703 | -1.22 | 9.81E-08 | 1.11E-06 |
| NUDT15 | 572 | -1.21 | 1.85E-03 | 8.41E-03 |
| CHD3 | 8876 | -1.21 | 1.27E-08 | 1.65E-07 |
| NUP107 | 1959 | -1.21 | 2.88E-06 | 2.54E-05 |
| SVIP | 1306 | -1.21 | 2.44E-05 | 1.79E-04 |
| MKLN1 | 1161 | -1.21 | 2.93E-04 | 1.67E-03 |
| EML4 | 2615 | -1.21 | 7.40E-06 | 6.03E-05 |
| TRIM28 | 15929 | -1.21 | 1.03E-05 | 8.15E-05 |
| CEP120 | 551 | -1.21 | 2.01E-03 | 9.01E-03 |
| ATRIP | 398 | -1.21 | 5.54E-03 | 2.14E-02 |
| SMC6 | 1409 | -1.21 | 1.16E-04 | 7.32E-04 |
| MOSPD1 | 541 | -1.21 | 1.67E-03 | 7.70E-03 |
| BLMH | 701 | -1.21 | 5.93E-04 | 3.09E-03 |
| UGGT2 | 448 | -1.21 | 4.33E-03 | 1.73E-02 |
| PRKRIR | 2341 | -1.21 | 4.51E-06 | 3.84E-05 |
| SECISBP2 | 1195 | -1.21 | 2.72E-04 | 1.56E-03 |
| PANK1 | 479 | -1.21 | 3.72E-03 | 1.52E-02 |
| AC005154.6 | 411 | -1.21 | 6.44E-03 | 2.42E-02 |
| FAM107B | 2801 | -1.21 | 1.31E-06 | 1.24E-05 |
| IDH1 | 2249 | -1.21 | 3.36E-05 | 2.39E-04 |
| DOCK9 | 966 | -1.21 | 2.12E-04 | 1.25E-03 |
| GS1-251I9.4 | 876 | -1.21 | 6.53E-04 | 3.37E-03 |
| HAUS3 | 540 | -1.21 | 2.21E-03 | 9.75E-03 |
| CDC42SE2 | 1225 | -1.21 | 1.58E-04 | 9.61E-04 |
| TDRD3 | 298 | -1.21 | 1.27E-02 | 4.29E-02 |
| PARP4 | 1957 | -1.21 | 7.58E-05 | 5.02E-04 |
| CEP68 | 374 | -1.21 | 1.08E-02 | 3.74E-02 |
| OPA3 | 944 | -1.21 | 1.79E-04 | 1.08E-03 |
| FN1 | 810 | -1.21 | 9.22E-03 | 3.28E-02 |
| KAT6A | 1867 | -1.21 | 4.09E-04 | 2.24E-03 |
| HJURP | 857 | -1.21 | 3.53E-04 | 1.97E-03 |
| IKBKAP | 1890 | -1.21 | 2.09E-05 | 1.55E-04 |
| IPO7 | 6365 | -1.21 | 1.74E-07 | 1.88E-06 |
| ENO2 | 1529 | -1.21 | 1.32E-04 | 8.22E-04 |
| ABCA5 | 428 | -1.21 | 5.42E-03 | 2.10E-02 |
| NUP214 | 1492 | -1.21 | 3.31E-05 | 2.37E-04 |
| FMR1 | 1850 | -1.21 | 1.77E-05 | 1.34E-04 |
| IFT122 | 642 | -1.21 | 1.66E-03 | 7.67E-03 |
| GLB1L2 | 406 | -1.21 | 5.67E-03 | 2.18E-02 |
| SLC39A11 | 1043 | -1.21 | 1.13E-04 | 7.18E-04 |
| CDK18 | 548 | -1.21 | 4.08E-03 | 1.65E-02 |
| ZNF740 | 1530 | -1.21 | 3.16E-05 | 2.27E-04 |
| NFKB1 | 1533 | -1.21 | 2.34E-05 | 1.72E-04 |
| SRSF10 | 3117 | -1.21 | 6.90E-07 | 6.87E-06 |
| PTK2 | 3687 | -1.21 | 9.41E-06 | 7.50E-05 |
| LBR | 767 | -1.21 | 1.15E-03 | 5.54E-03 |
| MLK4 | 316 | -1.21 | 1.17E-02 | 4.01E-02 |
| CDK2 | 1576 | -1.21 | 5.33E-05 | 3.64E-04 |
| UHRF1BP1L | 808 | -1.21 | 8.73E-04 | 4.37E-03 |
| PTPN9 | 879 | -1.21 | 4.80E-04 | 2.57E-03 |
| KIFAP3 | 611 | -1.21 | 1.52E-03 | 7.06E-03 |
| SLC7A1 | 3195 | -1.21 | 5.80E-07 | 5.84E-06 |
| CCDC101 | 410 | -1.21 | 8.44E-03 | 3.05E-02 |
| KIAA1731 | 699 | -1.21 | 1.02E-03 | 4.99E-03 |
| FZD3 | 659 | -1.21 | 1.69E-03 | 7.77E-03 |
| ATP7A | 780 | -1.21 | 7.71E-04 | 3.91E-03 |
| CCNB1 | 3417 | -1.21 | 2.37E-06 | 2.13E-05 |
| KIAA1549 | 1342 | -1.21 | 1.90E-04 | 1.13E-03 |
| NUP188 | 3036 | -1.21 | 1.12E-06 | 1.07E-05 |
| HSPA14 | 1263 | -1.21 | 9.56E-05 | 6.17E-04 |
| CEP85 | 580 | -1.21 | 1.83E-03 | 8.35E-03 |
| PLEKHB1 | 421 | -1.21 | 5.34E-03 | 2.08E-02 |
| FCHSD2 | 612 | -1.21 | 1.54E-03 | 7.14E-03 |
| NOL8 | 1381 | -1.21 | 1.82E-04 | 1.09E-03 |
| RFT1 | 461 | -1.21 | 4.79E-03 | 1.89E-02 |
| PNP | 693 | -1.21 | 1.10E-03 | 5.30E-03 |
| ZNF445 | 605 | -1.21 | 2.79E-03 | 1.20E-02 |
| SIPA1L2 | 510 | -1.21 | 3.62E-03 | 1.49E-02 |
| TGFBR1 | 1456 | -1.20 | 8.89E-05 | 5.78E-04 |
| MTHFD2 | 2723 | -1.20 | 2.09E-06 | 1.90E-05 |
| TMEM97 | 1794 | -1.20 | 1.52E-05 | 1.17E-04 |
| U2AF2 | 5154 | -1.20 | 5.30E-06 | 4.44E-05 |
| YBX2 | 733 | -1.20 | 1.17E-03 | 5.59E-03 |
| MCM7 | 15480 | -1.20 | 1.82E-08 | 2.32E-07 |
| TAB2 | 3075 | -1.20 | 3.49E-06 | 3.03E-05 |
| CEP135 | 513 | -1.20 | 4.71E-03 | 1.86E-02 |
| NXT1 | 537 | -1.20 | 3.75E-03 | 1.54E-02 |
| STXBP5 | 1025 | -1.20 | 4.38E-04 | 2.38E-03 |
| USP49 | 430 | -1.20 | 7.54E-03 | 2.77E-02 |
| NUP50 | 1842 | -1.20 | 9.60E-05 | 6.19E-04 |
| SNHG6 | 740 | -1.20 | 1.12E-03 | 5.38E-03 |
| RP11-800A3.4 | 403 | -1.20 | 9.80E-03 | 3.44E-02 |
| RAB39B | 389 | -1.20 | 9.65E-03 | 3.40E-02 |
| POLR3GL | 846 | -1.20 | 7.49E-04 | 3.81E-03 |
| SERTAD2 | 529 | -1.20 | 3.87E-03 | 1.58E-02 |
| UBN2 | 1249 | -1.20 | 4.33E-04 | 2.35E-03 |
| SNRPB | 2041 | -1.20 | 2.09E-03 | 9.32E-03 |
| USP8 | 4698 | -1.20 | 3.60E-06 | 3.13E-05 |
| AP4E1 | 2395 | -1.20 | 7.59E-05 | 5.02E-04 |
| APPL2 | 1644 | -1.20 | 3.58E-05 | 2.54E-04 |
| LIG3 | 877 | -1.20 | 9.70E-04 | 4.76E-03 |
| UBE2D1 | 364 | -1.20 | 1.29E-02 | 4.34E-02 |
| RBM17 | 2292 | -1.20 | 2.11E-05 | 1.57E-04 |
| SMARCC1 | 3348 | -1.20 | 2.55E-06 | 2.28E-05 |
| CHD6 | 9152 | -1.20 | 6.62E-07 | 6.61E-06 |
| SLC29A1 | 1244 | -1.20 | 2.77E-04 | 1.58E-03 |
| SYNGR1 | 616 | -1.20 | 6.49E-03 | 2.44E-02 |
| MSL2 | 917 | -1.20 | 5.48E-04 | 2.89E-03 |
| MSH2 | 2353 | -1.20 | 6.09E-06 | 5.05E-05 |
| SPIDR | 2168 | -1.20 | 1.61E-05 | 1.23E-04 |
| MTMR2 | 523 | -1.20 | 6.00E-03 | 2.29E-02 |
| H2AFV | 5078 | -1.20 | 2.40E-06 | 2.15E-05 |
| AGO2 | 1000 | -1.20 | 5.19E-03 | 2.03E-02 |
| DMKN | 1098 | -1.20 | 2.45E-04 | 1.42E-03 |
| LARS | 2575 | -1.20 | 8.95E-06 | 7.15E-05 |
| FUT8 | 3003 | -1.20 | 5.69E-06 | 4.74E-05 |
| GMNN | 1009 | -1.20 | 4.04E-04 | 2.22E-03 |
| MICU1 | 1538 | -1.20 | 4.35E-05 | 3.03E-04 |
| FAM127A | 1424 | -1.20 | 2.36E-03 | 1.03E-02 |
| HAUS4 | 464 | -1.20 | 7.01E-03 | 2.61E-02 |
| PRPF8 | 11965 | -1.20 | 6.96E-08 | 8.08E-07 |
| ZNF641 | 785 | -1.20 | 1.38E-03 | 6.50E-03 |
| HEATR1 | 1016 | -1.20 | 4.71E-04 | 2.53E-03 |
| PRKX | 638 | -1.20 | 2.52E-03 | 1.09E-02 |
| PABPC1 | 36373 | -1.20 | 2.37E-09 | 3.40E-08 |
| MPP6 | 433 | -1.20 | 9.32E-03 | 3.31E-02 |
| EXOC1 | 1263 | -1.20 | 1.59E-04 | 9.64E-04 |
| PARP1 | 4335 | -1.20 | 5.27E-07 | 5.33E-06 |
| GRWD1 | 1154 | -1.20 | 2.09E-03 | 9.32E-03 |
| GALNT3 | 1957 | -1.20 | 2.97E-05 | 2.15E-04 |
| CDK5RAP3 | 1422 | -1.20 | 1.57E-04 | 9.57E-04 |
| KDELR1 | 3728 | -1.20 | 1.77E-06 | 1.63E-05 |
| H3F3B | 19973 | -1.20 | 4.45E-08 | 5.34E-07 |
| PPP1R9B | 1636 | -1.20 | 9.90E-05 | 6.36E-04 |
| CCHCR1 | 566 | -1.20 | 5.47E-03 | 2.12E-02 |
| PPAP2C | 1137 | -1.20 | 7.87E-04 | 3.98E-03 |
| IFT140 | 774 | -1.20 | 1.91E-03 | 8.63E-03 |
| OAT | 3454 | -1.19 | 7.70E-05 | 5.08E-04 |
| CXorf40B | 993 | -1.19 | 8.87E-04 | 4.42E-03 |
| TRIM66 | 520 | -1.19 | 8.67E-03 | 3.12E-02 |
| CDC42EP4 | 1424 | -1.19 | 4.37E-04 | 2.37E-03 |
| TTF1 | 594 | -1.19 | 4.43E-03 | 1.77E-02 |
| PIGW | 459 | -1.19 | 8.00E-03 | 2.92E-02 |
| NETO2 | 1197 | -1.19 | 1.94E-04 | 1.16E-03 |
| ATP2C2 | 786 | -1.19 | 1.34E-03 | 6.32E-03 |
| SMIM19 | 435 | -1.19 | 8.51E-03 | 3.07E-02 |
| GSTCD | 916 | -1.19 | 5.98E-04 | 3.12E-03 |
| EIF3K | 2234 | -1.19 | 2.36E-05 | 1.73E-04 |
| RPS5 | 12113 | -1.19 | 1.82E-05 | 1.37E-04 |
| RAB15 | 2200 | -1.19 | 1.28E-05 | 9.93E-05 |
| HIBADH | 1641 | -1.19 | 1.00E-04 | 6.43E-04 |
| hsa-mir-6723 | 1367 | -1.19 | 1.16E-03 | 5.58E-03 |
| VPS13B | 3785 | -1.19 | 4.62E-05 | 3.20E-04 |
| PSMC4 | 2462 | -1.19 | 6.45E-05 | 4.32E-04 |
| CLPTM1 | 2293 | -1.19 | 1.54E-04 | 9.41E-04 |
| DCAKD | 625 | -1.19 | 3.88E-03 | 1.58E-02 |
| TDRD1 | 422 | -1.19 | 1.07E-02 | 3.72E-02 |
| RAD1 | 1096 | -1.19 | 7.82E-04 | 3.96E-03 |
| SLC46A3 | 397 | -1.19 | 1.28E-02 | 4.33E-02 |
| TAF3 | 607 | -1.19 | 4.70E-03 | 1.86E-02 |
| FITM2 | 733 | -1.19 | 2.67E-03 | 1.15E-02 |
| VRK1 | 1121 | -1.19 | 5.17E-04 | 2.75E-03 |
| CASP8AP2 | 1115 | -1.19 | 2.24E-03 | 9.86E-03 |
| CHAF1A | 961 | -1.19 | 3.59E-03 | 1.48E-02 |
| HAUS1 | 507 | -1.19 | 1.03E-02 | 3.60E-02 |
| TOP2B | 10363 | -1.19 | 2.94E-07 | 3.07E-06 |
| GGH | 831 | -1.19 | 1.73E-03 | 7.93E-03 |
| ARHGEF2 | 535 | -1.19 | 5.34E-03 | 2.08E-02 |
| ANP32B | 8187 | -1.19 | 5.89E-06 | 4.90E-05 |
| POU2F1 | 1151 | -1.19 | 2.86E-03 | 1.22E-02 |
| CEP350 | 3622 | -1.19 | 1.50E-05 | 1.15E-04 |
| NAPA | 1443 | -1.19 | 1.34E-03 | 6.34E-03 |
| ZBTB26 | 537 | -1.19 | 5.67E-03 | 2.18E-02 |
| KIAA1324L | 1589 | -1.19 | 1.73E-04 | 1.05E-03 |
| SH3RF1 | 673 | -1.19 | 3.53E-03 | 1.46E-02 |
| PHF2 | 2379 | -1.19 | 2.74E-05 | 2.00E-04 |
| PIKFYVE | 1179 | -1.19 | 2.82E-03 | 1.20E-02 |
| ARRB2 | 881 | -1.19 | 1.06E-03 | 5.14E-03 |
| ZDHHC13 | 607 | -1.19 | 3.94E-03 | 1.60E-02 |
| CDC6 | 1799 | -1.19 | 8.82E-05 | 5.75E-04 |
| TCF20 | 1358 | -1.19 | 7.77E-04 | 3.94E-03 |
| CAPNS1 | 6008 | -1.19 | 1.86E-06 | 1.70E-05 |
| TMEM30B | 2658 | -1.18 | 3.08E-05 | 2.23E-04 |
| IRAK4 | 821 | -1.18 | 3.25E-03 | 1.36E-02 |
| C6orf106 | 3676 | -1.18 | 1.23E-05 | 9.54E-05 |
| INO80D | 536 | -1.18 | 8.65E-03 | 3.12E-02 |
| H2AFZ | 9439 | -1.18 | 2.47E-06 | 2.21E-05 |
| ACAD10 | 731 | -1.18 | 2.94E-03 | 1.25E-02 |
| NUCKS1 | 26661 | -1.18 | 5.98E-07 | 6.00E-06 |
| SETX | 2760 | -1.18 | 2.32E-04 | 1.36E-03 |
| TTC7A | 924 | -1.18 | 1.29E-03 | 6.13E-03 |
| CLOCK | 2125 | -1.18 | 2.14E-04 | 1.26E-03 |
| RALGPS2 | 1457 | -1.18 | 1.19E-03 | 5.71E-03 |
| SFPQ | 6309 | -1.18 | 1.67E-06 | 1.54E-05 |
| CNOT1 | 5876 | -1.18 | 5.01E-05 | 3.44E-04 |
| DENND2C | 599 | -1.18 | 5.99E-03 | 2.28E-02 |
| RBM42 | 979 | -1.18 | 8.14E-03 | 2.96E-02 |
| TET3 | 2852 | -1.18 | 8.16E-05 | 5.37E-04 |
| RP11-220I1.1 | 1562 | -1.18 | 1.95E-04 | 1.16E-03 |
| EIF4EBP2 | 5435 | -1.18 | 6.50E-06 | 5.34E-05 |
| MTMR11 | 473 | -1.18 | 1.10E-02 | 3.80E-02 |
| NEO1 | 2160 | -1.18 | 1.04E-04 | 6.67E-04 |
| RSU1 | 1566 | -1.18 | 2.38E-04 | 1.39E-03 |
| TMEM170B | 468 | -1.18 | 1.27E-02 | 4.30E-02 |
| ASXL2 | 2865 | -1.18 | 3.01E-04 | 1.70E-03 |
| AP2A1 | 1497 | -1.18 | 9.28E-03 | 3.30E-02 |
| KLF10 | 1237 | -1.18 | 3.78E-04 | 2.09E-03 |
| ERLIN1 | 1392 | -1.18 | 4.25E-04 | 2.32E-03 |
| ZNF318 | 1684 | -1.18 | 1.49E-04 | 9.11E-04 |
| NCL | 16688 | -1.18 | 1.76E-06 | 1.62E-05 |
| PHLPP1 | 498 | -1.18 | 1.36E-02 | 4.54E-02 |
| TSEN34 | 2546 | -1.18 | 7.57E-04 | 3.85E-03 |
| SNRNP200 | 12558 | -1.18 | 7.12E-07 | 7.05E-06 |
| VSIG10 | 1741 | -1.18 | 2.72E-04 | 1.56E-03 |
| PVT1 | 559 | -1.18 | 6.96E-03 | 2.59E-02 |
| MYO1B | 6212 | -1.18 | 2.05E-06 | 1.86E-05 |
| RYBP | 1678 | -1.18 | 6.77E-04 | 3.49E-03 |
| AVL9 | 4124 | -1.18 | 3.41E-05 | 2.43E-04 |
| ZMYND11 | 4276 | -1.18 | 3.03E-05 | 2.19E-04 |
| TIAM1 | 595 | -1.18 | 9.69E-03 | 3.41E-02 |
| SPTLC2 | 4284 | -1.18 | 2.11E-05 | 1.57E-04 |
| PURA | 770 | -1.18 | 3.19E-03 | 1.34E-02 |
| LETMD1 | 1738 | -1.18 | 2.97E-04 | 1.68E-03 |
| ZKSCAN8 | 1036 | -1.18 | 2.55E-03 | 1.11E-02 |
| PLOD2 | 1347 | -1.18 | 7.59E-04 | 3.86E-03 |
| NEK4 | 877 | -1.18 | 6.69E-03 | 2.50E-02 |
| DCAF16 | 859 | -1.18 | 3.39E-03 | 1.41E-02 |
| TMEM18 | 1349 | -1.18 | 4.99E-04 | 2.66E-03 |
| TGFB3 | 1058 | -1.18 | 1.49E-03 | 6.94E-03 |
| KIAA1147 | 1469 | -1.18 | 4.96E-04 | 2.65E-03 |
| RXRA | 2668 | -1.18 | 5.96E-03 | 2.27E-02 |
| ITGAE | 624 | -1.18 | 5.25E-03 | 2.05E-02 |
| VPS36 | 763 | -1.18 | 4.07E-03 | 1.65E-02 |
| CBR1 | 754 | -1.18 | 3.90E-03 | 1.59E-02 |
| IRF3 | 871 | -1.18 | 5.78E-03 | 2.22E-02 |
| PHF3 | 2255 | -1.18 | 5.69E-05 | 3.86E-04 |
| PAN2 | 1474 | -1.18 | 4.81E-04 | 2.58E-03 |
| RGS3 | 1088 | -1.18 | 1.82E-03 | 8.32E-03 |
| THOC5 | 692 | -1.18 | 7.59E-03 | 2.79E-02 |
| NEB | 1015 | -1.18 | 9.56E-03 | 3.37E-02 |
| XPO4 | 1192 | -1.18 | 1.33E-03 | 6.28E-03 |
| RNF38 | 581 | -1.17 | 7.40E-03 | 2.73E-02 |
| CHD1 | 1502 | -1.17 | 3.20E-04 | 1.79E-03 |
| XPO1 | 6711 | -1.17 | 4.32E-05 | 3.01E-04 |
| CSAD | 550 | -1.17 | 1.50E-02 | 4.91E-02 |
| SOCS4 | 1652 | -1.17 | 3.60E-04 | 2.00E-03 |
| HMGXB4 | 1022 | -1.17 | 2.22E-03 | 9.79E-03 |
| AKAP1 | 2988 | -1.17 | 3.60E-05 | 2.55E-04 |
| PATL1 | 647 | -1.17 | 1.04E-02 | 3.62E-02 |
| LRRC58 | 3933 | -1.17 | 1.77E-05 | 1.33E-04 |
| RFWD3 | 3307 | -1.17 | 3.13E-05 | 2.26E-04 |
| MGA | 2006 | -1.17 | 1.54E-03 | 7.14E-03 |
| MED12 | 1509 | -1.17 | 3.92E-04 | 2.16E-03 |
| ZADH2 | 1364 | -1.17 | 4.00E-04 | 2.20E-03 |
| YWHAQ | 9157 | -1.17 | 7.02E-07 | 6.97E-06 |
| ATP8B1 | 1234 | -1.17 | 9.23E-04 | 4.57E-03 |
| GTF3C5 | 2019 | -1.17 | 7.06E-04 | 3.62E-03 |
| MAT2A | 4284 | -1.17 | 9.75E-06 | 7.74E-05 |
| SNHG1 | 1172 | -1.17 | 1.57E-03 | 7.29E-03 |
| RPS6KA3 | 1088 | -1.17 | 1.26E-03 | 6.01E-03 |
| NEDD1 | 904 | -1.17 | 2.94E-03 | 1.25E-02 |
| PDK3 | 624 | -1.17 | 7.56E-03 | 2.78E-02 |
| TAF15 | 4162 | -1.17 | 1.46E-05 | 1.12E-04 |
| USP54 | 713 | -1.17 | 6.54E-03 | 2.45E-02 |
| PBRM1 | 1666 | -1.17 | 1.13E-03 | 5.42E-03 |
| PRR3 | 520 | -1.17 | 1.36E-02 | 4.53E-02 |
| CRTC3 | 817 | -1.17 | 3.56E-03 | 1.47E-02 |
| GPATCH11 | 633 | -1.17 | 9.68E-03 | 3.41E-02 |
| ATP5SL | 683 | -1.17 | 9.19E-03 | 3.27E-02 |
| COMMD2 | 1094 | -1.17 | 1.29E-03 | 6.12E-03 |
| TOP1MT | 692 | -1.17 | 1.23E-02 | 4.18E-02 |
| LTBP1 | 1877 | -1.17 | 3.56E-04 | 1.98E-03 |
| CAT | 1492 | -1.17 | 7.86E-04 | 3.98E-03 |
| ATG5 | 1022 | -1.17 | 2.04E-03 | 9.11E-03 |
| WDR36 | 1004 | -1.17 | 1.97E-03 | 8.87E-03 |
| CCP110 | 1587 | -1.17 | 1.55E-03 | 7.18E-03 |
| CHAF1B | 566 | -1.17 | 1.17E-02 | 4.00E-02 |
| CNOT11 | 1504 | -1.17 | 6.04E-04 | 3.14E-03 |
| BLVRB | 1606 | -1.17 | 8.21E-03 | 2.98E-02 |
| MYO18A | 731 | -1.17 | 6.12E-03 | 2.32E-02 |
| SPR | 1697 | -1.17 | 6.03E-04 | 3.14E-03 |
| CHSY1 | 904 | -1.17 | 3.43E-03 | 1.43E-02 |
| MKRN1 | 3081 | -1.17 | 2.68E-04 | 1.54E-03 |
| DYNLL2 | 7311 | -1.17 | 3.80E-06 | 3.28E-05 |
| TNRC6A | 2939 | -1.17 | 9.50E-05 | 6.14E-04 |
| LRR1 | 753 | -1.17 | 9.21E-03 | 3.28E-02 |
| NUCB1 | 1396 | -1.17 | 1.92E-03 | 8.66E-03 |
| GUF1 | 723 | -1.17 | 7.66E-03 | 2.81E-02 |
| CYTH2 | 846 | -1.17 | 4.11E-03 | 1.66E-02 |
| GATA3 | 17122 | -1.17 | 8.71E-04 | 4.36E-03 |
| SF3B5 | 2203 | -1.17 | 4.14E-04 | 2.27E-03 |
| LTN1 | 958 | -1.17 | 2.33E-03 | 1.02E-02 |
| RBM6 | 1100 | -1.17 | 2.29E-03 | 1.00E-02 |
| TEX10 | 1248 | -1.17 | 1.90E-03 | 8.58E-03 |
| PLEKHA7 | 1155 | -1.17 | 2.99E-03 | 1.27E-02 |
| UGGT1 | 2253 | -1.17 | 2.67E-03 | 1.15E-02 |
| SNX8 | 1035 | -1.17 | 1.11E-02 | 3.83E-02 |
| TLN1 | 3028 | -1.17 | 6.93E-04 | 3.55E-03 |
| RPL15 | 28383 | -1.17 | 1.11E-06 | 1.06E-05 |
| GEMIN4 | 1429 | -1.17 | 5.67E-04 | 2.98E-03 |
| SPRED2 | 2004 | -1.17 | 2.53E-04 | 1.47E-03 |
| C9orf114 | 1023 | -1.17 | 4.87E-03 | 1.91E-02 |
| HIRIP3 | 967 | -1.17 | 3.63E-03 | 1.49E-02 |
| CSTF2T | 945 | -1.17 | 3.04E-03 | 1.28E-02 |
| TUBGCP3 | 761 | -1.17 | 6.33E-03 | 2.39E-02 |
| MYH10 | 2397 | -1.17 | 1.17E-04 | 7.36E-04 |
| IKBKB | 542 | -1.17 | 1.34E-02 | 4.50E-02 |
| CCNE2 | 703 | -1.17 | 6.88E-03 | 2.56E-02 |
| SSRP1 | 2034 | -1.17 | 1.74E-04 | 1.05E-03 |
| NNT | 1477 | -1.17 | 5.73E-03 | 2.20E-02 |
| THRA | 554 | -1.17 | 1.33E-02 | 4.45E-02 |
| KIAA0368 | 2927 | -1.17 | 5.45E-05 | 3.71E-04 |
| NFYA | 1117 | -1.17 | 1.87E-03 | 8.50E-03 |
| RCC1 | 2258 | -1.16 | 1.70E-04 | 1.03E-03 |
| CRNDE | 684 | -1.16 | 9.14E-03 | 3.26E-02 |
| CMC1 | 576 | -1.16 | 1.20E-02 | 4.07E-02 |
| DCP2 | 2326 | -1.16 | 3.55E-04 | 1.98E-03 |
| ABHD5 | 589 | -1.16 | 1.20E-02 | 4.07E-02 |
| AGPAT5 | 793 | -1.16 | 6.99E-03 | 2.60E-02 |
| TOMM7 | 2371 | -1.16 | 1.49E-04 | 9.14E-04 |
| HNRNPA1 | 18557 | -1.16 | 4.73E-06 | 4.01E-05 |
| KEAP1 | 2349 | -1.16 | 1.57E-03 | 7.27E-03 |
| GUSB | 1515 | -1.16 | 9.22E-04 | 4.57E-03 |
| RRNAD1 | 798 | -1.16 | 5.09E-03 | 1.99E-02 |
| UNK | 994 | -1.16 | 4.16E-03 | 1.67E-02 |
| ZNF274 | 741 | -1.16 | 6.29E-03 | 2.38E-02 |
| VKORC1L1 | 2037 | -1.16 | 3.91E-04 | 2.15E-03 |
| TPP1 | 838 | -1.16 | 3.93E-03 | 1.60E-02 |
| ATL2 | 2038 | -1.16 | 5.60E-04 | 2.94E-03 |
| RLIM | 1947 | -1.16 | 2.41E-03 | 1.05E-02 |
| MASTL | 1086 | -1.16 | 2.86E-03 | 1.22E-02 |
| HILPDA | 1660 | -1.16 | 7.27E-04 | 3.71E-03 |
| KLHL5 | 957 | -1.16 | 3.81E-03 | 1.56E-02 |
| PTDSS1 | 2940 | -1.16 | 1.98E-04 | 1.18E-03 |
| BOD1 | 1286 | -1.16 | 1.41E-03 | 6.63E-03 |
| SCAP | 1584 | -1.16 | 2.91E-03 | 1.24E-02 |
| GLTP | 1865 | -1.16 | 1.65E-03 | 7.62E-03 |
| CDCA4 | 1196 | -1.16 | 1.50E-02 | 4.92E-02 |
| SCD5 | 796 | -1.16 | 9.56E-03 | 3.37E-02 |
| COPG2 | 639 | -1.16 | 1.13E-02 | 3.90E-02 |
| LPGAT1 | 2185 | -1.16 | 7.85E-04 | 3.97E-03 |
| RICTOR | 924 | -1.16 | 8.66E-03 | 3.12E-02 |
| UTP20 | 1681 | -1.16 | 9.47E-04 | 4.67E-03 |
| LAMB2 | 4941 | -1.16 | 1.40E-04 | 8.64E-04 |
| DERL1 | 3538 | -1.16 | 1.48E-04 | 9.11E-04 |
| RAD51C | 4466 | -1.16 | 1.11E-04 | 7.04E-04 |
| PARP2 | 846 | -1.16 | 6.32E-03 | 2.38E-02 |
| LTV1 | 782 | -1.16 | 6.12E-03 | 2.32E-02 |
| CHPT1 | 880 | -1.16 | 6.78E-03 | 2.53E-02 |
| BRD3 | 1169 | -1.16 | 3.60E-03 | 1.49E-02 |
| ELMSAN1 | 3605 | -1.16 | 9.90E-05 | 6.36E-04 |
| ITPK1 | 3544 | -1.16 | 4.24E-04 | 2.32E-03 |
| ZNRF1 | 699 | -1.16 | 1.31E-02 | 4.39E-02 |
| MAN2A1 | 1242 | -1.16 | 3.66E-03 | 1.50E-02 |
| CNOT3 | 1396 | -1.16 | 5.00E-03 | 1.96E-02 |
| LARP4B | 2714 | -1.16 | 1.38E-04 | 8.51E-04 |
| GXYLT1 | 1644 | -1.16 | 2.18E-03 | 9.66E-03 |
| LSM2 | 887 | -1.16 | 6.41E-03 | 2.41E-02 |
| ADCY3 | 1024 | -1.16 | 6.92E-03 | 2.58E-02 |
| APPL1 | 1362 | -1.16 | 1.72E-03 | 7.89E-03 |
| CKAP2 | 1837 | -1.16 | 9.08E-04 | 4.51E-03 |
| MAP3K3 | 1323 | -1.16 | 2.22E-03 | 9.78E-03 |
| DDX39B | 2196 | -1.16 | 1.14E-03 | 5.50E-03 |
| PIGC | 960 | -1.16 | 3.85E-03 | 1.57E-02 |
| JRK | 1074 | -1.16 | 3.37E-03 | 1.40E-02 |
| QSOX2 | 728 | -1.16 | 9.76E-03 | 3.43E-02 |
| MCM9 | 697 | -1.16 | 8.67E-03 | 3.12E-02 |
| EEF1A1P5 | 1756 | -1.16 | 4.36E-03 | 1.74E-02 |
| DBF4 | 1499 | -1.16 | 1.20E-03 | 5.72E-03 |
| TMEM181 | 1062 | -1.16 | 4.36E-03 | 1.75E-02 |
| SMG1 | 7424 | -1.16 | 9.32E-04 | 4.61E-03 |
| ASAP1 | 1917 | -1.16 | 4.89E-04 | 2.61E-03 |
| TRIM24 | 2298 | -1.16 | 1.29E-03 | 6.11E-03 |
| RUVBL2 | 1642 | -1.16 | 3.95E-03 | 1.60E-02 |
| DMTF1 | 1737 | -1.16 | 1.87E-03 | 8.50E-03 |
| RB1 | 1516 | -1.16 | 2.43E-03 | 1.06E-02 |
| PHTF2 | 1828 | -1.16 | 1.38E-03 | 6.49E-03 |
| SRSF7 | 3519 | -1.16 | 2.28E-04 | 1.33E-03 |
| C7orf55-LUC7L2 | 805 | -1.16 | 7.92E-03 | 2.89E-02 |
| PMVK | 1255 | -1.16 | 4.23E-03 | 1.70E-02 |
| AHCTF1 | 1365 | -1.16 | 2.17E-03 | 9.63E-03 |
| GLE1 | 2381 | -1.16 | 1.32E-03 | 6.21E-03 |
| KIF21A | 1480 | -1.16 | 2.09E-03 | 9.32E-03 |
| MARCKS | 2769 | -1.16 | 2.59E-04 | 1.50E-03 |
| MCMBP | 2844 | -1.15 | 1.51E-04 | 9.23E-04 |
| TSC1 | 1057 | -1.15 | 5.84E-03 | 2.24E-02 |
| LACTB | 982 | -1.15 | 5.89E-03 | 2.25E-02 |
| NOP56 | 2223 | -1.15 | 1.04E-03 | 5.07E-03 |
| GNAQ | 1882 | -1.15 | 1.35E-03 | 6.34E-03 |
| TRAK1 | 1035 | -1.15 | 3.65E-03 | 1.50E-02 |
| SPIN1 | 2096 | -1.15 | 8.32E-04 | 4.18E-03 |
| TCHP | 982 | -1.15 | 5.00E-03 | 1.96E-02 |
| DENND4C | 1175 | -1.15 | 5.51E-03 | 2.13E-02 |
| MT-CO1 | 207182 | -1.15 | 8.34E-05 | 5.47E-04 |
| C1orf198 | 646 | -1.15 | 1.39E-02 | 4.62E-02 |
| PRKCH | 1239 | -1.15 | 2.50E-03 | 1.08E-02 |
| PPP2R1A | 4449 | -1.15 | 2.99E-04 | 1.69E-03 |
| CASP2 | 1181 | -1.15 | 3.01E-03 | 1.28E-02 |
| ARPP19 | 15623 | -1.15 | 1.12E-04 | 7.07E-04 |
| CARHSP1 | 1071 | -1.15 | 5.20E-03 | 2.03E-02 |
| PI4K2A | 1054 | -1.15 | 4.23E-03 | 1.70E-02 |
| BAG1 | 9476 | -1.15 | 8.59E-05 | 5.61E-04 |
| STRN | 2096 | -1.15 | 1.89E-03 | 8.55E-03 |
| MOB1A | 4437 | -1.15 | 2.87E-04 | 1.63E-03 |
| SIX4 | 744 | -1.15 | 1.24E-02 | 4.20E-02 |
| BTG1 | 1118 | -1.15 | 5.27E-03 | 2.05E-02 |
| IPO9 | 2789 | -1.15 | 5.77E-04 | 3.02E-03 |
| DDX6 | 4071 | -1.15 | 3.83E-03 | 1.56E-02 |
| ZFP62 | 1487 | -1.15 | 2.79E-03 | 1.20E-02 |
| IPO5 | 3137 | -1.15 | 5.05E-04 | 2.68E-03 |
| NUP133 | 1227 | -1.15 | 4.53E-03 | 1.80E-02 |
| MBTPS2 | 964 | -1.15 | 8.43E-03 | 3.05E-02 |
| STRBP | 1470 | -1.15 | 2.65E-03 | 1.14E-02 |
| HERC1 | 2948 | -1.15 | 3.01E-03 | 1.28E-02 |
| PDCD2 | 1971 | -1.15 | 9.47E-04 | 4.67E-03 |
| GNPTAB | 3218 | -1.15 | 9.13E-04 | 4.53E-03 |
| SNHG7 | 1411 | -1.15 | 7.26E-03 | 2.68E-02 |
| ARGLU1 | 916 | -1.15 | 8.65E-03 | 3.11E-02 |
| EDRF1 | 743 | -1.15 | 1.16E-02 | 3.96E-02 |
| NUP54 | 1347 | -1.15 | 2.36E-03 | 1.03E-02 |
| GGCT | 3138 | -1.15 | 8.89E-04 | 4.43E-03 |
| WASH5P | 1246 | -1.15 | 7.66E-03 | 2.81E-02 |
| MLTK | 817 | -1.15 | 9.70E-03 | 3.41E-02 |
| SMPD4 | 2061 | -1.15 | 2.20E-03 | 9.71E-03 |
| GNB5 | 894 | -1.15 | 1.09E-02 | 3.77E-02 |
| AHCY | 4290 | -1.15 | 1.46E-04 | 8.96E-04 |
| NF1 | 3512 | -1.15 | 2.39E-03 | 1.04E-02 |
| FRG1B | 766 | -1.15 | 1.28E-02 | 4.32E-02 |
| C1orf63 | 812 | -1.15 | 1.37E-02 | 4.56E-02 |
| TATDN2 | 1156 | -1.15 | 6.56E-03 | 2.46E-02 |
| ATM | 1034 | -1.15 | 7.16E-03 | 2.65E-02 |
| CHUK | 1221 | -1.15 | 6.35E-03 | 2.39E-02 |
| GMCL1 | 1212 | -1.15 | 3.37E-03 | 1.40E-02 |
| PKP4 | 3212 | -1.15 | 3.48E-04 | 1.94E-03 |
| CHEK1 | 874 | -1.15 | 1.34E-02 | 4.49E-02 |
| ZNF507 | 1004 | -1.15 | 9.32E-03 | 3.31E-02 |
| PTPN23 | 1096 | -1.15 | 1.14E-02 | 3.92E-02 |
| RSRC1 | 1080 | -1.15 | 9.15E-03 | 3.26E-02 |
| ANXA4 | 1551 | -1.15 | 2.40E-03 | 1.04E-02 |
| POLE3 | 3654 | -1.15 | 9.00E-04 | 4.47E-03 |
| SENP1 | 1522 | -1.15 | 2.11E-03 | 9.39E-03 |
| USP13 | 1205 | -1.15 | 5.82E-03 | 2.23E-02 |
| ZNF638 | 3569 | -1.15 | 5.46E-04 | 2.88E-03 |
| ZBTB38 | 784 | -1.15 | 1.21E-02 | 4.12E-02 |
| NUDT5 | 1411 | -1.15 | 2.73E-03 | 1.17E-02 |
| USP10 | 3366 | -1.15 | 2.18E-04 | 1.28E-03 |
| GFPT1 | 2859 | -1.15 | 1.20E-03 | 5.74E-03 |
| CPSF6 | 2914 | -1.15 | 5.90E-04 | 3.08E-03 |
| TRAK2 | 1963 | -1.15 | 2.80E-03 | 1.20E-02 |
| ZBTB9 | 796 | -1.15 | 1.26E-02 | 4.27E-02 |
| USP12 | 1359 | -1.15 | 5.26E-03 | 2.05E-02 |
| OAS3 | 2895 | -1.15 | 1.16E-02 | 3.98E-02 |
| SUZ12 | 1536 | -1.15 | 2.56E-03 | 1.11E-02 |
| ZNF706 | 1942 | -1.15 | 1.52E-03 | 7.07E-03 |
| MAPKAPK5 | 1085 | -1.15 | 7.45E-03 | 2.74E-02 |
| NAGA | 791 | -1.15 | 1.46E-02 | 4.83E-02 |
| EEF1B2 | 7327 | -1.15 | 1.36E-04 | 8.40E-04 |
| CIZ1 | 3044 | -1.15 | 2.01E-03 | 9.01E-03 |
| DOCK1 | 1304 | -1.15 | 3.16E-03 | 1.33E-02 |
| SPAG9 | 2438 | -1.15 | 1.22E-03 | 5.81E-03 |
| ZNF280D | 778 | -1.15 | 1.44E-02 | 4.75E-02 |
| LRRC16A | 1019 | -1.14 | 6.35E-03 | 2.39E-02 |
| RNF26 | 1150 | -1.14 | 8.14E-03 | 2.96E-02 |
| PUF60 | 3715 | -1.14 | 3.55E-03 | 1.47E-02 |
| ATL3 | 2847 | -1.14 | 4.07E-03 | 1.65E-02 |
| FOXJ2 | 929 | -1.14 | 9.94E-03 | 3.48E-02 |
| ARHGAP35 | 5707 | -1.14 | 1.31E-04 | 8.15E-04 |
| SYCP2 | 2705 | -1.14 | 3.28E-03 | 1.37E-02 |
| NCOA1 | 2839 | -1.14 | 1.29E-03 | 6.12E-03 |
| CTCF | 3311 | -1.14 | 4.45E-04 | 2.41E-03 |
| SLC10A3 | 1437 | -1.14 | 1.48E-02 | 4.87E-02 |
| VPRBP | 1096 | -1.14 | 1.06E-02 | 3.68E-02 |
| DARS2 | 3432 | -1.14 | 5.82E-04 | 3.04E-03 |
| PROSC | 902 | -1.14 | 1.44E-02 | 4.75E-02 |
| PRDM2 | 979 | -1.14 | 7.99E-03 | 2.92E-02 |
| ERI2 | 910 | -1.14 | 1.35E-02 | 4.52E-02 |
| SRSF1 | 6035 | -1.14 | 6.45E-05 | 4.32E-04 |
| LXN | 3174 | -1.14 | 8.64E-04 | 4.33E-03 |
| CDK4 | 2513 | -1.14 | 8.90E-04 | 4.43E-03 |
| TRIQK | 1644 | -1.14 | 3.24E-03 | 1.36E-02 |
| WDR11 | 1752 | -1.14 | 1.90E-03 | 8.58E-03 |
| GIGYF2 | 2056 | -1.14 | 1.80E-03 | 8.21E-03 |
| COA1 | 1939 | -1.14 | 4.02E-03 | 1.63E-02 |
| SPG11 | 1513 | -1.14 | 4.07E-03 | 1.65E-02 |
| UBE2Q2 | 1093 | -1.14 | 6.89E-03 | 2.57E-02 |
| LPP | 2236 | -1.14 | 2.81E-03 | 1.20E-02 |
| NQO1 | 6377 | -1.14 | 1.93E-04 | 1.15E-03 |
| TMEM131 | 1605 | -1.14 | 4.48E-03 | 1.78E-02 |
| MRPL11 | 1433 | -1.14 | 3.25E-03 | 1.36E-02 |
| CMC2 | 1115 | -1.14 | 9.05E-03 | 3.24E-02 |
| UPF2 | 2042 | -1.14 | 1.95E-03 | 8.76E-03 |
| TJP2 | 2320 | -1.14 | 1.54E-03 | 7.14E-03 |
| TXLNG | 915 | -1.14 | 1.29E-02 | 4.35E-02 |
| UBXN2B | 1500 | -1.14 | 3.50E-03 | 1.45E-02 |
| NAB2 | 1202 | -1.14 | 9.70E-03 | 3.41E-02 |
| CBX3 | 7430 | -1.14 | 1.18E-04 | 7.42E-04 |
| ALDH3A2 | 2515 | -1.14 | 1.17E-03 | 5.61E-03 |
| LSM5 | 1694 | -1.14 | 3.64E-03 | 1.50E-02 |
| DDX59 | 923 | -1.14 | 1.21E-02 | 4.12E-02 |
| MAF1 | 1994 | -1.14 | 3.96E-03 | 1.60E-02 |
| FLOT1 | 3835 | -1.14 | 2.06E-03 | 9.22E-03 |
| ABL2 | 1245 | -1.14 | 1.21E-02 | 4.12E-02 |
| DPY19L3 | 1100 | -1.14 | 1.04E-02 | 3.63E-02 |
| PCIF1 | 955 | -1.14 | 1.41E-02 | 4.68E-02 |
| ACTN4 | 6750 | -1.14 | 7.92E-03 | 2.89E-02 |
| TTC3 | 6382 | -1.14 | 1.31E-03 | 6.18E-03 |
| TBC1D5 | 5141 | -1.14 | 7.78E-04 | 3.94E-03 |
| PRDX3 | 5530 | -1.14 | 5.67E-04 | 2.98E-03 |
| RNF20 | 1363 | -1.14 | 1.16E-02 | 3.97E-02 |
| TMX4 | 1593 | -1.14 | 2.74E-03 | 1.17E-02 |
| MBOAT7 | 2653 | -1.14 | 1.12E-02 | 3.85E-02 |
| ARPC5 | 4620 | -1.14 | 4.37E-04 | 2.37E-03 |
| KAT7 | 1844 | -1.14 | 3.81E-03 | 1.56E-02 |
| NAE1 | 1024 | -1.14 | 9.05E-03 | 3.23E-02 |
| BRPF3 | 2133 | -1.14 | 4.13E-03 | 1.67E-02 |
| UBQLN1 | 2973 | -1.14 | 9.46E-04 | 4.67E-03 |
| EPCAM | 7263 | -1.14 | 1.64E-04 | 9.93E-04 |
| SET | 13249 | -1.14 | 2.65E-04 | 1.53E-03 |
| LMTK2 | 2000 | -1.14 | 3.11E-03 | 1.31E-02 |
| CHAMP1 | 1138 | -1.14 | 1.14E-02 | 3.91E-02 |
| ALDH7A1 | 2493 | -1.14 | 1.41E-03 | 6.61E-03 |
| CDC123 | 1296 | -1.14 | 5.21E-03 | 2.03E-02 |
| TNPO1 | 4332 | -1.14 | 4.30E-04 | 2.35E-03 |
| TRA2B | 4720 | -1.14 | 2.44E-04 | 1.42E-03 |
| CASC7 | 2073 | -1.14 | 3.04E-03 | 1.29E-02 |
| PSMG2 | 1274 | -1.14 | 6.16E-03 | 2.34E-02 |
| RBBP8 | 1444 | -1.14 | 5.43E-03 | 2.11E-02 |
| INPP4B | 5716 | -1.14 | 1.05E-03 | 5.11E-03 |
| CREB1 | 1267 | -1.14 | 9.97E-03 | 3.49E-02 |
| TMSB4X | 17225 | -1.14 | 5.01E-05 | 3.45E-04 |
| CHTF8 | 2192 | -1.14 | 1.87E-03 | 8.50E-03 |
| ANAPC1 | 1648 | -1.13 | 7.14E-03 | 2.65E-02 |
| SPEN | 3166 | -1.13 | 4.43E-03 | 1.77E-02 |
| ATE1 | 1034 | -1.13 | 1.26E-02 | 4.26E-02 |
| KIF23 | 2281 | -1.13 | 3.34E-03 | 1.40E-02 |
| ILF3 | 7867 | -1.13 | 1.20E-04 | 7.54E-04 |
| KMT2A | 4403 | -1.13 | 9.66E-03 | 3.40E-02 |
| KANSL3 | 1666 | -1.13 | 5.68E-03 | 2.18E-02 |
| DHX9 | 10567 | -1.13 | 3.27E-04 | 1.83E-03 |
| C8orf33 | 1975 | -1.13 | 2.23E-03 | 9.82E-03 |
| SLC6A6 | 4007 | -1.13 | 8.68E-04 | 4.34E-03 |
| WHSC1L1 | 2034 | -1.13 | 9.75E-03 | 3.42E-02 |
| BRPF1 | 1353 | -1.13 | 7.30E-03 | 2.70E-02 |
| BTAF1 | 1484 | -1.13 | 1.17E-02 | 3.99E-02 |
| ABHD12 | 2300 | -1.13 | 2.47E-03 | 1.07E-02 |
| ZNF275 | 1290 | -1.13 | 8.53E-03 | 3.08E-02 |
| ENOPH1 | 1888 | -1.13 | 5.72E-03 | 2.20E-02 |
| FUS | 8809 | -1.13 | 1.67E-04 | 1.01E-03 |
| PTPN3 | 1761 | -1.13 | 5.33E-03 | 2.07E-02 |
| LAS1L | 1490 | -1.13 | 5.72E-03 | 2.20E-02 |
| PTBP1 | 5510 | -1.13 | 9.67E-03 | 3.40E-02 |
| ZZEF1 | 2923 | -1.13 | 1.08E-03 | 5.24E-03 |
| TOMM40 | 2777 | -1.13 | 4.68E-03 | 1.85E-02 |
| PCNX | 2852 | -1.13 | 2.73E-03 | 1.17E-02 |
| UAP1 | 1188 | -1.13 | 1.30E-02 | 4.38E-02 |
| C7orf73 | 1985 | -1.13 | 3.37E-03 | 1.40E-02 |
| CCNT2 | 1018 | -1.13 | 1.38E-02 | 4.59E-02 |
| CHD7 | 1412 | -1.13 | 1.05E-02 | 3.65E-02 |
| BDP1 | 2060 | -1.13 | 1.08E-02 | 3.73E-02 |
| PHF20L1 | 1257 | -1.13 | 1.35E-02 | 4.52E-02 |
| DCLRE1B | 3414 | -1.13 | 8.10E-04 | 4.08E-03 |
| LRRC1 | 1166 | -1.13 | 1.32E-02 | 4.42E-02 |
| TRIM33 | 20632 | -1.13 | 4.65E-04 | 2.50E-03 |
| COX6C | 8265 | -1.13 | 7.84E-04 | 3.97E-03 |
| PPM1L | 1520 | -1.13 | 8.70E-03 | 3.13E-02 |
| IARS | 6059 | -1.13 | 7.95E-04 | 4.01E-03 |
| PDCL | 992 | -1.13 | 1.42E-02 | 4.70E-02 |
| GINM1 | 1220 | -1.13 | 9.22E-03 | 3.28E-02 |
| RPS29 | 13358 | -1.13 | 2.71E-04 | 1.56E-03 |
| RNF216 | 2271 | -1.13 | 2.86E-03 | 1.22E-02 |
| PPP1CC | 4402 | -1.13 | 1.43E-03 | 6.69E-03 |
| HDAC1 | 3399 | -1.13 | 1.88E-03 | 8.54E-03 |
| XPC | 1623 | -1.13 | 6.76E-03 | 2.53E-02 |
| CREBBP | 4548 | -1.13 | 3.28E-03 | 1.37E-02 |
| KIAA1143 | 1205 | -1.13 | 1.03E-02 | 3.59E-02 |
| SENP6 | 2287 | -1.13 | 4.54E-03 | 1.80E-02 |
| GDI2 | 6390 | -1.13 | 4.40E-04 | 2.39E-03 |
| NDST1 | 4114 | -1.13 | 2.30E-03 | 1.01E-02 |
| SLC25A40 | 1652 | -1.13 | 6.15E-03 | 2.33E-02 |
| ANAPC5 | 5020 | -1.13 | 4.96E-04 | 2.65E-03 |
| RBBP7 | 5566 | -1.13 | 6.37E-04 | 3.30E-03 |
| PHF14 | 1730 | -1.13 | 8.98E-03 | 3.21E-02 |
| ASAP2 | 1515 | -1.13 | 1.12E-02 | 3.87E-02 |
| RBM14 | 1931 | -1.13 | 1.03E-02 | 3.59E-02 |
| RPS9 | 11121 | -1.13 | 4.24E-03 | 1.70E-02 |
| RPL14 | 12206 | -1.13 | 2.03E-04 | 1.21E-03 |
| RPL22 | 7162 | -1.12 | 6.79E-04 | 3.49E-03 |
| BIRC6 | 6711 | -1.12 | 7.29E-03 | 2.69E-02 |
| MYOF | 3335 | -1.12 | 3.31E-03 | 1.38E-02 |
| PHC3 | 2748 | -1.12 | 6.20E-03 | 2.35E-02 |
| NBN | 5634 | -1.12 | 1.39E-03 | 6.53E-03 |
| EIF5 | 9714 | -1.12 | 6.07E-04 | 3.16E-03 |
| SMCHD1 | 1691 | -1.12 | 1.33E-02 | 4.46E-02 |
| ITGB5 | 10178 | -1.12 | 6.41E-04 | 3.32E-03 |
| PCGF5 | 1429 | -1.12 | 1.21E-02 | 4.11E-02 |
| ASH1L | 5433 | -1.12 | 6.04E-03 | 2.30E-02 |
| TAGLN2 | 6214 | -1.12 | 1.02E-03 | 4.99E-03 |
| RBBP6 | 2602 | -1.12 | 5.61E-03 | 2.17E-02 |
| DPY19L4 | 1901 | -1.12 | 7.21E-03 | 2.67E-02 |
| LSM3 | 2400 | -1.12 | 9.66E-03 | 3.40E-02 |
| BCLAF1 | 5545 | -1.12 | 2.37E-03 | 1.03E-02 |
| NUDT4 | 4689 | -1.12 | 3.36E-03 | 1.40E-02 |
| HK2 | 1899 | -1.12 | 1.05E-02 | 3.66E-02 |
| MAP7 | 2328 | -1.12 | 6.49E-03 | 2.44E-02 |
| TMEM230 | 1465 | -1.12 | 9.86E-03 | 3.46E-02 |
| BUB3 | 3963 | -1.12 | 1.41E-03 | 6.61E-03 |
| GTF3A | 2018 | -1.12 | 8.35E-03 | 3.03E-02 |
| CPSF3 | 2040 | -1.12 | 5.67E-03 | 2.18E-02 |
| GNA13 | 4150 | -1.12 | 2.99E-03 | 1.27E-02 |
| PCM1 | 2229 | -1.12 | 8.16E-03 | 2.96E-02 |
| CCNL1 | 1767 | -1.12 | 1.30E-02 | 4.36E-02 |
| FAM208A | 2564 | -1.12 | 9.32E-03 | 3.31E-02 |
| KIAA0430 | 1722 | -1.12 | 9.22E-03 | 3.28E-02 |
| DICER1 | 5487 | -1.12 | 3.84E-03 | 1.57E-02 |
| ERBB2IP | 2377 | -1.12 | 1.32E-02 | 4.43E-02 |
| MGEA5 | 3730 | -1.12 | 3.97E-03 | 1.61E-02 |
| NUPL1 | 1995 | -1.12 | 1.36E-02 | 4.53E-02 |
| CCNG2 | 2025 | -1.12 | 8.60E-03 | 3.10E-02 |
| PRRC2B | 7467 | -1.12 | 1.95E-03 | 8.77E-03 |
| HNRNPR | 4842 | -1.12 | 3.82E-03 | 1.56E-02 |
| SIN3A | 2843 | -1.12 | 5.73E-03 | 2.20E-02 |
| AZIN1 | 6683 | -1.12 | 1.68E-03 | 7.72E-03 |
| STK24 | 1976 | -1.12 | 7.79E-03 | 2.85E-02 |
| MSL1 | 1857 | -1.12 | 1.19E-02 | 4.05E-02 |
| C11orf30 | 1671 | -1.12 | 1.50E-02 | 4.92E-02 |
| ALDH5A1 | 1513 | -1.12 | 1.49E-02 | 4.88E-02 |
| URI1 | 2507 | -1.12 | 8.53E-03 | 3.08E-02 |
| TRRAP | 7580 | -1.12 | 2.91E-03 | 1.24E-02 |
| FN3KRP | 1436 | -1.12 | 1.52E-02 | 4.96E-02 |
| EWSR1 | 5910 | -1.12 | 1.43E-03 | 6.70E-03 |
| NFATC2IP | 2236 | -1.12 | 7.10E-03 | 2.63E-02 |
| HUWE1 | 14752 | -1.12 | 4.89E-03 | 1.92E-02 |
| MCFD2 | 3626 | -1.12 | 5.77E-03 | 2.21E-02 |
| TFDP1 | 3550 | -1.11 | 3.87E-03 | 1.58E-02 |
| PITRM1 | 2295 | -1.11 | 7.36E-03 | 2.71E-02 |
| YWHAH | 1696 | -1.11 | 1.25E-02 | 4.23E-02 |
| RBBP4 | 2350 | -1.11 | 7.71E-03 | 2.83E-02 |
| HNRNPK | 15595 | -1.11 | 1.44E-03 | 6.75E-03 |
| SUPT5H | 2705 | -1.11 | 9.54E-03 | 3.37E-02 |
| DHX36 | 2743 | -1.11 | 8.38E-03 | 3.04E-02 |
| FAM120A | 8103 | -1.11 | 1.12E-03 | 5.40E-03 |
| U2SURP | 2953 | -1.11 | 5.42E-03 | 2.10E-02 |
| ODF2 | 1830 | -1.11 | 1.23E-02 | 4.17E-02 |
| HIATL1 | 2275 | -1.11 | 1.41E-02 | 4.67E-02 |
| MAPRE1 | 4249 | -1.11 | 4.58E-03 | 1.82E-02 |
| MBNL1 | 3497 | -1.11 | 7.13E-03 | 2.64E-02 |
| SUDS3 | 3387 | -1.11 | 9.65E-03 | 3.40E-02 |
| LEO1 | 3387 | -1.11 | 1.03E-02 | 3.60E-02 |
| KIF4A | 2100 | -1.11 | 1.42E-02 | 4.70E-02 |
| HNRNPM | 5268 | -1.11 | 3.63E-03 | 1.50E-02 |
| TMEM43 | 2003 | -1.11 | 1.40E-02 | 4.67E-02 |
| SH3YL1 | 2469 | -1.11 | 1.00E-02 | 3.50E-02 |
| TMEM106C | 8764 | -1.11 | 1.58E-03 | 7.33E-03 |
| LINC00657 | 8552 | -1.11 | 4.16E-03 | 1.68E-02 |
| DDX46 | 3232 | -1.11 | 6.93E-03 | 2.58E-02 |
| NONO | 10894 | -1.11 | 2.92E-03 | 1.24E-02 |
| FUBP1 | 3014 | -1.11 | 1.36E-02 | 4.53E-02 |
| EIF2AK1 | 11185 | -1.11 | 2.64E-03 | 1.14E-02 |
| SPTLC1 | 2626 | -1.11 | 1.18E-02 | 4.03E-02 |
| H3F3A | 4238 | -1.11 | 4.83E-03 | 1.90E-02 |
| FAM217B | 3276 | -1.10 | 7.11E-03 | 2.64E-02 |
| CBX1 | 4458 | -1.10 | 8.70E-03 | 3.13E-02 |
| HNRNPA3 | 11300 | -1.10 | 2.69E-03 | 1.16E-02 |
| UBE2K | 3332 | -1.10 | 1.11E-02 | 3.82E-02 |
| UGP2 | 2712 | -1.10 | 1.12E-02 | 3.85E-02 |
| PLEKHF2 | 2779 | -1.10 | 1.05E-02 | 3.65E-02 |
| RPL32 | 25117 | -1.10 | 3.25E-03 | 1.36E-02 |
| MYO6 | 5065 | -1.10 | 1.17E-02 | 4.00E-02 |
| IDS | 4438 | -1.10 | 6.03E-03 | 2.29E-02 |
| KLHDC2 | 2097 | -1.10 | 1.50E-02 | 4.91E-02 |
| SRSF2 | 3332 | -1.10 | 1.17E-02 | 4.01E-02 |
| FAM168B | 4979 | -1.10 | 7.79E-03 | 2.85E-02 |
| USP14 | 3291 | -1.10 | 1.02E-02 | 3.55E-02 |
| EIF3H | 3773 | -1.10 | 7.83E-03 | 2.86E-02 |
| FAM83H-AS1 | 4618 | -1.10 | 1.01E-02 | 3.55E-02 |
| SMEK2 | 3188 | -1.10 | 1.19E-02 | 4.06E-02 |
| ILF2 | 7875 | -1.10 | 5.66E-03 | 2.18E-02 |
| PDS5A | 5736 | -1.10 | 1.12E-02 | 3.86E-02 |
| RPA1 | 4134 | -1.10 | 1.35E-02 | 4.50E-02 |
| PPT1 | 7154 | -1.10 | 8.92E-03 | 3.20E-02 |
| SRSF3 | 6941 | -1.10 | 8.76E-03 | 3.14E-02 |
| CCT4 | 4840 | -1.10 | 9.16E-03 | 3.27E-02 |
| LITAF | 7959 | -1.10 | 1.42E-02 | 4.70E-02 |
| RPL12 | 17563 | -1.10 | 6.43E-03 | 2.42E-02 |
| IQGAP1 | 7147 | -1.09 | 1.51E-02 | 4.93E-02 |
| HNRNPU | 7872 | -1.09 | 1.11E-02 | 3.82E-02 |
| EIF4B | 17121 | -1.09 | 1.18E-02 | 4.02E-02 |
| SRSF6 | 4053 | -1.09 | 1.36E-02 | 4.53E-02 |
| RPS7 | 19505 | -1.09 | 1.22E-02 | 4.15E-02 |
| NOLC1 | 5081 | -1.09 | 1.29E-02 | 4.36E-02 |
| EIF3B | 9897 | -1.09 | 1.06E-02 | 3.67E-02 |
| PLCG1 | 8089 | -1.09 | 1.13E-02 | 3.88E-02 |
| ADIPOR2 | 22420 | 1.08 | 1.07E-02 | 3.71E-02 |
| SUMO3 | 8485 | 1.09 | 1.15E-02 | 3.96E-02 |
| LARP1 | 8703 | 1.09 | 1.08E-02 | 3.74E-02 |
| HSPA5 | 9061 | 1.09 | 1.38E-02 | 4.60E-02 |
| GAS5 | 5944 | 1.09 | 1.16E-02 | 3.98E-02 |
| DHCR24 | 17857 | 1.09 | 1.10E-02 | 3.80E-02 |
| MAGT1 | 3685 | 1.10 | 1.51E-02 | 4.93E-02 |
| MEPCE | 5123 | 1.10 | 1.31E-02 | 4.41E-02 |
| ACTN1 | 5416 | 1.10 | 1.17E-02 | 3.99E-02 |
| SEPT11 | 4511 | 1.10 | 9.74E-03 | 3.42E-02 |
| AKT1 | 13668 | 1.10 | 1.29E-02 | 4.33E-02 |
| SELT | 4664 | 1.10 | 7.19E-03 | 2.66E-02 |
| HDLBP | 10405 | 1.10 | 6.02E-03 | 2.29E-02 |
| SLC35B2 | 3321 | 1.10 | 1.11E-02 | 3.84E-02 |
| PSMD12 | 3886 | 1.10 | 1.45E-02 | 4.77E-02 |
| CYB561 | 10175 | 1.10 | 5.64E-03 | 2.17E-02 |
| SMG5 | 4896 | 1.10 | 7.39E-03 | 2.73E-02 |
| BTBD6 | 3148 | 1.10 | 1.48E-02 | 4.86E-02 |
| G3BP1 | 5555 | 1.10 | 1.21E-02 | 4.12E-02 |
| KIF5B | 5868 | 1.10 | 1.24E-02 | 4.21E-02 |
| SRP72 | 4551 | 1.10 | 9.22E-03 | 3.28E-02 |
| DDOST | 4631 | 1.10 | 6.78E-03 | 2.53E-02 |
| CAMKK2 | 2251 | 1.10 | 1.44E-02 | 4.74E-02 |
| MAPK9 | 4101 | 1.10 | 1.16E-02 | 3.98E-02 |
| DLST | 5070 | 1.10 | 7.71E-03 | 2.83E-02 |
| CDC42 | 4570 | 1.10 | 1.23E-02 | 4.18E-02 |
| ESYT1 | 3693 | 1.10 | 1.02E-02 | 3.55E-02 |
| PRMT2 | 2572 | 1.10 | 1.27E-02 | 4.30E-02 |
| WSB2 | 3718 | 1.10 | 8.86E-03 | 3.18E-02 |
| PSMB4 | 10787 | 1.10 | 8.29E-03 | 3.01E-02 |
| UQCRC1 | 3527 | 1.10 | 8.63E-03 | 3.11E-02 |
| GLB1 | 2523 | 1.10 | 1.44E-02 | 4.75E-02 |
| PDPK1 | 2839 | 1.10 | 1.22E-02 | 4.16E-02 |
| GRSF1 | 3835 | 1.11 | 9.46E-03 | 3.35E-02 |
| OS9 | 4184 | 1.11 | 5.57E-03 | 2.15E-02 |
| ATP5A1 | 11764 | 1.11 | 1.93E-03 | 8.69E-03 |
| MECP2 | 3689 | 1.11 | 9.55E-03 | 3.37E-02 |
| PIGT | 2889 | 1.11 | 9.79E-03 | 3.44E-02 |
| DYNLL1 | 6093 | 1.11 | 6.99E-03 | 2.60E-02 |
| PCCB | 2906 | 1.11 | 7.70E-03 | 2.82E-02 |
| USP9X | 2844 | 1.11 | 1.48E-02 | 4.87E-02 |
| UBE2H | 3634 | 1.11 | 1.38E-02 | 4.59E-02 |
| NFKBIA | 2576 | 1.11 | 1.28E-02 | 4.33E-02 |
| NBR1 | 4302 | 1.11 | 6.28E-03 | 2.37E-02 |
| FAM210B | 4620 | 1.11 | 4.88E-03 | 1.92E-02 |
| SOD1 | 3683 | 1.11 | 8.88E-03 | 3.18E-02 |
| ACTR1A | 2959 | 1.11 | 7.19E-03 | 2.66E-02 |
| PRKAR1A | 10801 | 1.11 | 2.70E-03 | 1.16E-02 |
| LAMC1 | 3200 | 1.11 | 1.12E-02 | 3.86E-02 |
| RABEP1 | 3049 | 1.11 | 7.99E-03 | 2.92E-02 |
| MLXIP | 2747 | 1.11 | 1.07E-02 | 3.71E-02 |
| EIF4G3 | 3225 | 1.11 | 1.36E-02 | 4.54E-02 |
| APPBP2 | 15819 | 1.11 | 4.34E-03 | 1.74E-02 |
| DNM2 | 3303 | 1.11 | 1.43E-02 | 4.72E-02 |
| SLC5A6 | 3431 | 1.11 | 5.61E-03 | 2.16E-02 |
| POLR2A | 8694 | 1.11 | 2.83E-03 | 1.21E-02 |
| SEC31A | 4793 | 1.11 | 5.93E-03 | 2.26E-02 |
| CTBP2 | 2918 | 1.11 | 6.38E-03 | 2.40E-02 |
| LAP3 | 2738 | 1.11 | 1.43E-02 | 4.73E-02 |
| ESRP2 | 3211 | 1.11 | 6.84E-03 | 2.55E-02 |
| DNM1L | 2381 | 1.11 | 1.40E-02 | 4.64E-02 |
| SCAMP3 | 2551 | 1.11 | 1.45E-02 | 4.80E-02 |
| SEC62 | 3796 | 1.11 | 6.54E-03 | 2.45E-02 |
| MRPL51 | 2421 | 1.11 | 9.24E-03 | 3.28E-02 |
| COX7C | 7124 | 1.11 | 4.71E-03 | 1.86E-02 |
| KIF3B | 2025 | 1.11 | 1.22E-02 | 4.14E-02 |
| OGDH | 5451 | 1.11 | 3.17E-03 | 1.33E-02 |
| CDK2AP1 | 2295 | 1.11 | 1.44E-02 | 4.76E-02 |
| INSIG1 | 4182 | 1.11 | 6.66E-03 | 2.49E-02 |
| NEU1 | 1949 | 1.11 | 1.50E-02 | 4.92E-02 |
| CRK | 3573 | 1.11 | 4.34E-03 | 1.74E-02 |
| UBFD1 | 4246 | 1.11 | 5.42E-03 | 2.10E-02 |
| PPP2R2C | 2021 | 1.11 | 1.35E-02 | 4.50E-02 |
| TRAPPC2L | 1661 | 1.11 | 1.50E-02 | 4.92E-02 |
| SLC39A7 | 5435 | 1.11 | 2.32E-03 | 1.01E-02 |
| GPI | 5548 | 1.11 | 3.60E-03 | 1.49E-02 |
| RPS6KA1 | 1728 | 1.11 | 1.43E-02 | 4.73E-02 |
| PIGS | 2357 | 1.11 | 1.05E-02 | 3.66E-02 |
| ATP6V0D1 | 2956 | 1.11 | 4.83E-03 | 1.90E-02 |
| COX7A2 | 2923 | 1.11 | 1.04E-02 | 3.62E-02 |
| SLC30A9 | 2794 | 1.11 | 5.27E-03 | 2.05E-02 |
| CAPZB | 4615 | 1.11 | 3.63E-03 | 1.49E-02 |
| RRAGA | 1596 | 1.11 | 1.24E-02 | 4.22E-02 |
| MMAB | 1782 | 1.11 | 1.28E-02 | 4.32E-02 |
| TMED10 | 11265 | 1.12 | 1.26E-03 | 5.99E-03 |
| MT-ND2 | 58426 | 1.12 | 2.91E-03 | 1.24E-02 |
| SORT1 | 7183 | 1.12 | 3.56E-03 | 1.47E-02 |
| NOC2L | 3094 | 1.12 | 1.48E-02 | 4.87E-02 |
| SMIM14 | 7345 | 1.12 | 2.02E-03 | 9.04E-03 |
| PDCD6 | 2480 | 1.12 | 5.72E-03 | 2.20E-02 |
| PSMD6 | 26482 | 1.12 | 2.56E-04 | 1.48E-03 |
| EARS2 | 1735 | 1.12 | 1.27E-02 | 4.30E-02 |
| MAP1LC3B | 2090 | 1.12 | 8.41E-03 | 3.04E-02 |
| VAMP3 | 1645 | 1.12 | 1.43E-02 | 4.72E-02 |
| ESD | 2798 | 1.12 | 9.40E-03 | 3.33E-02 |
| RPS26 | 4023 | 1.12 | 3.11E-03 | 1.31E-02 |
| PPP4C | 3649 | 1.12 | 6.05E-03 | 2.30E-02 |
| OLA1 | 2803 | 1.12 | 4.58E-03 | 1.82E-02 |
| ATP5L | 2654 | 1.12 | 7.45E-03 | 2.74E-02 |
| TUFM | 7098 | 1.12 | 2.84E-03 | 1.21E-02 |
| TJP1 | 2525 | 1.12 | 7.15E-03 | 2.65E-02 |
| C1orf21 | 2566 | 1.12 | 4.36E-03 | 1.74E-02 |
| IAH1 | 1480 | 1.12 | 1.24E-02 | 4.20E-02 |
| UBL5 | 2063 | 1.12 | 8.34E-03 | 3.02E-02 |
| HMOX2 | 1818 | 1.12 | 7.99E-03 | 2.91E-02 |
| RNF7 | 2077 | 1.12 | 7.07E-03 | 2.63E-02 |
| LAMP1 | 2653 | 1.12 | 3.46E-03 | 1.44E-02 |
| TACC1 | 5549 | 1.12 | 2.28E-03 | 1.00E-02 |
| GGA2 | 4129 | 1.12 | 1.18E-03 | 5.63E-03 |
| DCTN2 | 3011 | 1.12 | 3.56E-03 | 1.47E-02 |
| ACAA2 | 2653 | 1.12 | 1.15E-02 | 3.95E-02 |
| ZFAND3 | 1959 | 1.12 | 7.02E-03 | 2.61E-02 |
| PRKAB2 | 1959 | 1.12 | 8.88E-03 | 3.18E-02 |
| GNL3 | 2172 | 1.12 | 4.41E-03 | 1.76E-02 |
| THOC7 | 7653 | 1.12 | 6.84E-04 | 3.52E-03 |
| FTSJ3 | 5625 | 1.12 | 9.64E-04 | 4.74E-03 |
| SEC24C | 4456 | 1.12 | 2.42E-03 | 1.05E-02 |
| FNBP1 | 1579 | 1.12 | 1.13E-02 | 3.89E-02 |
| ARF4 | 3467 | 1.12 | 5.77E-03 | 2.21E-02 |
| SEC16A | 9554 | 1.12 | 9.54E-04 | 4.70E-03 |
| KIAA1522 | 5198 | 1.12 | 1.11E-02 | 3.84E-02 |
| YKT6 | 3756 | 1.12 | 2.22E-03 | 9.79E-03 |
| ZFP90 | 1273 | 1.12 | 1.42E-02 | 4.71E-02 |
| ICA1 | 1881 | 1.12 | 1.28E-02 | 4.32E-02 |
| HARS | 1943 | 1.12 | 7.83E-03 | 2.86E-02 |
| AGPAT3 | 2737 | 1.12 | 7.13E-03 | 2.64E-02 |
| PPP2CB | 1200 | 1.12 | 1.43E-02 | 4.72E-02 |
| GNB1 | 7972 | 1.13 | 4.17E-04 | 2.28E-03 |
| SDHB | 1480 | 1.13 | 8.41E-03 | 3.04E-02 |
| SULF2 | 10325 | 1.13 | 6.03E-04 | 3.14E-03 |
| EIF4A2 | 4747 | 1.13 | 6.16E-03 | 2.34E-02 |
| KDM5C | 1977 | 1.13 | 5.06E-03 | 1.98E-02 |
| GGCX | 1600 | 1.13 | 1.04E-02 | 3.62E-02 |
| HAX1 | 2936 | 1.13 | 1.59E-03 | 7.38E-03 |
| PSME2 | 2608 | 1.13 | 7.17E-03 | 2.65E-02 |
| PPIB | 1682 | 1.13 | 1.31E-02 | 4.41E-02 |
| SNRNP25 | 1826 | 1.13 | 1.41E-02 | 4.67E-02 |
| TPT1 | 22475 | 1.13 | 6.89E-04 | 3.54E-03 |
| UNC45A | 2114 | 1.13 | 6.14E-03 | 2.33E-02 |
| NADK | 1482 | 1.13 | 9.48E-03 | 3.36E-02 |
| PDCD4 | 3238 | 1.13 | 5.34E-03 | 2.08E-02 |
| NDUFB11 | 1213 | 1.13 | 1.19E-02 | 4.04E-02 |
| MPRIP | 4239 | 1.13 | 2.07E-03 | 9.26E-03 |
| GDI1 | 4533 | 1.13 | 1.00E-03 | 4.88E-03 |
| RPL22L1 | 1869 | 1.13 | 1.02E-02 | 3.57E-02 |
| GTF2F1 | 1907 | 1.13 | 9.70E-03 | 3.41E-02 |
| AMZ2 | 3205 | 1.13 | 2.32E-03 | 1.01E-02 |
| STAU2 | 1614 | 1.13 | 7.63E-03 | 2.80E-02 |
| MDH2 | 8094 | 1.13 | 7.77E-04 | 3.94E-03 |
| HERC3 | 1117 | 1.13 | 1.44E-02 | 4.74E-02 |
| PPP1R7 | 1466 | 1.13 | 7.92E-03 | 2.89E-02 |
| TSC22D1 | 2076 | 1.13 | 3.79E-03 | 1.55E-02 |
| NARF | 1296 | 1.13 | 1.14E-02 | 3.93E-02 |
| SEPT7 | 4886 | 1.13 | 6.59E-04 | 3.40E-03 |
| POP5 | 1201 | 1.13 | 1.17E-02 | 4.00E-02 |
| RUSC1 | 4883 | 1.13 | 7.02E-03 | 2.61E-02 |
| DCAF4 | 2174 | 1.13 | 2.75E-03 | 1.18E-02 |
| NSUN2 | 2462 | 1.13 | 1.67E-03 | 7.70E-03 |
| EIF2B4 | 1328 | 1.13 | 8.70E-03 | 3.13E-02 |
| VPS45 | 2199 | 1.13 | 3.91E-03 | 1.59E-02 |
| JKAMP | 1842 | 1.13 | 4.09E-03 | 1.65E-02 |
| ATP5F1 | 7774 | 1.13 | 5.87E-04 | 3.07E-03 |
| TXN2 | 3497 | 1.13 | 9.15E-04 | 4.53E-03 |
| DAAM1 | 3218 | 1.13 | 1.42E-03 | 6.65E-03 |
| ZMPSTE24 | 1861 | 1.13 | 6.46E-03 | 2.43E-02 |
| SCARB2 | 5837 | 1.13 | 6.56E-04 | 3.38E-03 |
| TDG | 2691 | 1.13 | 1.21E-03 | 5.80E-03 |
| CD81 | 3642 | 1.13 | 3.24E-03 | 1.36E-02 |
| DDB1 | 6805 | 1.13 | 6.40E-04 | 3.31E-03 |
| ZFAS1 | 3345 | 1.13 | 8.99E-04 | 4.47E-03 |
| SKIV2L | 1245 | 1.13 | 1.04E-02 | 3.62E-02 |
| PBX1 | 12101 | 1.13 | 9.94E-05 | 6.38E-04 |
| ATP5H | 2384 | 1.13 | 2.91E-03 | 1.24E-02 |
| MT-ND6 | 30199 | 1.13 | 2.05E-03 | 9.16E-03 |
| SQSTM1 | 5002 | 1.13 | 5.22E-03 | 2.03E-02 |
| NFE2L1 | 5379 | 1.13 | 3.88E-04 | 2.14E-03 |
| DNAJB6 | 2944 | 1.14 | 9.28E-04 | 4.59E-03 |
| PDIA4 | 4422 | 1.14 | 2.76E-04 | 1.58E-03 |
| MMADHC | 2583 | 1.14 | 1.26E-03 | 6.00E-03 |
| KIF13A | 1893 | 1.14 | 6.30E-03 | 2.38E-02 |
| PDAP1 | 6422 | 1.14 | 3.09E-04 | 1.74E-03 |
| TSPYL4 | 1795 | 1.14 | 2.31E-03 | 1.01E-02 |
| ZDHHC23 | 1887 | 1.14 | 5.62E-03 | 2.17E-02 |
| RIC8A | 2568 | 1.14 | 1.46E-03 | 6.81E-03 |
| LRIG1 | 1609 | 1.14 | 7.95E-03 | 2.90E-02 |
| EXOC7 | 3375 | 1.14 | 6.91E-04 | 3.55E-03 |
| TRAPPC6B | 2072 | 1.14 | 3.00E-03 | 1.27E-02 |
| UBC | 27029 | 1.14 | 1.11E-03 | 5.35E-03 |
| CHDH | 1106 | 1.14 | 1.01E-02 | 3.52E-02 |
| FKBP9 | 2115 | 1.14 | 1.67E-03 | 7.70E-03 |
| PSKH1 | 1162 | 1.14 | 1.12E-02 | 3.87E-02 |
| NRIP1 | 1496 | 1.14 | 1.10E-02 | 3.81E-02 |
| EMC3 | 4207 | 1.14 | 1.10E-03 | 5.32E-03 |
| MARK2 | 1930 | 1.14 | 3.65E-03 | 1.50E-02 |
| SKIL | 2477 | 1.14 | 4.23E-03 | 1.70E-02 |
| CUX1 | 9042 | 1.14 | 3.69E-04 | 2.04E-03 |
| OCLN | 1391 | 1.14 | 8.75E-03 | 3.14E-02 |
| TRPS1 | 6171 | 1.14 | 1.97E-03 | 8.86E-03 |
| ATP5G1 | 1998 | 1.14 | 2.60E-03 | 1.12E-02 |
| TAOK3 | 1540 | 1.14 | 3.76E-03 | 1.54E-02 |
| CALCOCO2 | 2107 | 1.14 | 5.41E-03 | 2.10E-02 |
| RPN2 | 9833 | 1.14 | 3.35E-04 | 1.87E-03 |
| NDUFS6 | 1155 | 1.14 | 9.40E-03 | 3.33E-02 |
| SLC35C2 | 1436 | 1.14 | 1.32E-02 | 4.42E-02 |
| FYTTD1 | 4033 | 1.14 | 1.01E-03 | 4.92E-03 |
| ABHD17C | 3142 | 1.14 | 5.76E-04 | 3.02E-03 |
| MOV10 | 2836 | 1.14 | 6.90E-04 | 3.55E-03 |
| PRPF6 | 4397 | 1.14 | 4.55E-04 | 2.45E-03 |
| TRMT1L | 1212 | 1.14 | 7.07E-03 | 2.62E-02 |
| CD46 | 4204 | 1.14 | 3.97E-04 | 2.18E-03 |
| ENO1 | 40633 | 1.14 | 1.70E-04 | 1.03E-03 |
| MYH9 | 11032 | 1.14 | 9.64E-04 | 4.74E-03 |
| PACSIN2 | 1952 | 1.14 | 1.78E-03 | 8.15E-03 |
| YWHAZ | 39819 | 1.14 | 4.15E-05 | 2.91E-04 |
| STYXL1 | 1113 | 1.14 | 9.49E-03 | 3.36E-02 |
| LRRC47 | 891 | 1.14 | 1.25E-02 | 4.22E-02 |
| NIPAL2 | 1298 | 1.14 | 3.89E-03 | 1.58E-02 |
| MARVELD2 | 1561 | 1.14 | 6.77E-03 | 2.53E-02 |
| EIF2AK4 | 1108 | 1.14 | 5.85E-03 | 2.24E-02 |
| GSE1 | 10302 | 1.14 | 5.55E-04 | 2.92E-03 |
| HMBS | 1409 | 1.14 | 4.21E-03 | 1.69E-02 |
| SMG8 | 2165 | 1.14 | 1.12E-03 | 5.39E-03 |
| PSMB2 | 1784 | 1.14 | 3.27E-03 | 1.37E-02 |
| SMURF1 | 1922 | 1.14 | 2.23E-03 | 9.81E-03 |
| MT-TP | 1649 | 1.14 | 5.95E-03 | 2.27E-02 |
| ZMAT2 | 3018 | 1.14 | 8.59E-04 | 4.31E-03 |
| SDHC | 4118 | 1.14 | 3.83E-04 | 2.11E-03 |
| GNAI3 | 5787 | 1.14 | 1.02E-04 | 6.51E-04 |
| MPV17 | 1832 | 1.14 | 1.96E-03 | 8.81E-03 |
| LRRFIP1 | 3037 | 1.14 | 7.59E-04 | 3.86E-03 |
| LNX2 | 1367 | 1.14 | 3.64E-03 | 1.50E-02 |
| ATG9A | 1636 | 1.14 | 2.56E-03 | 1.11E-02 |
| RFX5 | 2717 | 1.14 | 8.05E-04 | 4.06E-03 |
| MT-RNR1 | 23192 | 1.14 | 7.84E-03 | 2.87E-02 |
| CD9 | 11948 | 1.14 | 3.61E-05 | 2.55E-04 |
| PSMB5 | 2460 | 1.14 | 9.86E-04 | 4.83E-03 |
| NUP210L | 1151 | 1.14 | 5.97E-03 | 2.28E-02 |
| CD99L2 | 1712 | 1.14 | 1.78E-03 | 8.13E-03 |
| BAZ2A | 4661 | 1.14 | 2.16E-04 | 1.27E-03 |
| YTHDF2 | 1902 | 1.14 | 1.97E-03 | 8.84E-03 |
| C11orf48 | 849 | 1.14 | 1.49E-02 | 4.88E-02 |
| IL6ST | 1634 | 1.14 | 3.72E-03 | 1.52E-02 |
| TARS | 2889 | 1.14 | 8.66E-04 | 4.34E-03 |
| IMPDH2 | 5459 | 1.14 | 3.09E-04 | 1.74E-03 |
| CCNC | 1603 | 1.14 | 2.21E-03 | 9.75E-03 |
| HN1 | 2065 | 1.15 | 8.70E-03 | 3.13E-02 |
| RAD23B | 8609 | 1.15 | 1.16E-04 | 7.33E-04 |
| NINJ1 | 2913 | 1.15 | 4.76E-03 | 1.88E-02 |
| SMUG1 | 1049 | 1.15 | 6.40E-03 | 2.41E-02 |
| UBE2E1 | 2174 | 1.15 | 9.85E-04 | 4.83E-03 |
| ATP1B3 | 2424 | 1.15 | 3.91E-03 | 1.59E-02 |
| PSMC2 | 5402 | 1.15 | 2.41E-04 | 1.40E-03 |
| TARBP2 | 1144 | 1.15 | 1.11E-02 | 3.83E-02 |
| LAD1 | 2484 | 1.15 | 4.53E-03 | 1.80E-02 |
| PSME1 | 4939 | 1.15 | 1.61E-04 | 9.78E-04 |
| ATP6V1A | 4110 | 1.15 | 1.09E-03 | 5.27E-03 |
| SDF4 | 1939 | 1.15 | 7.61E-03 | 2.80E-02 |
| SRP14 | 4094 | 1.15 | 2.03E-04 | 1.21E-03 |
| RP11-622K12.1 | 1170 | 1.15 | 5.04E-03 | 1.97E-02 |
| IGSF3 | 22309 | 1.15 | 1.65E-05 | 1.25E-04 |
| SRA1 | 754 | 1.15 | 1.30E-02 | 4.36E-02 |
| ATP6V0A1 | 1236 | 1.15 | 5.35E-03 | 2.08E-02 |
| RNF114 | 3372 | 1.15 | 2.57E-04 | 1.49E-03 |
| SARS | 6466 | 1.15 | 2.06E-04 | 1.22E-03 |
| FAM53C | 1282 | 1.15 | 4.47E-03 | 1.78E-02 |
| PLBD2 | 856 | 1.15 | 1.12E-02 | 3.85E-02 |
| IDH3B | 1300 | 1.15 | 3.61E-03 | 1.49E-02 |
| ERLIN2 | 1599 | 1.15 | 2.78E-03 | 1.19E-02 |
| UQCRH | 2913 | 1.15 | 1.03E-03 | 5.02E-03 |
| SND1 | 4366 | 1.15 | 1.05E-04 | 6.72E-04 |
| ANAPC13 | 1748 | 1.15 | 2.44E-03 | 1.06E-02 |
| PIP5K1A | 5120 | 1.15 | 3.68E-04 | 2.04E-03 |
| PTPN12 | 2062 | 1.15 | 2.07E-03 | 9.24E-03 |
| ZMYM2 | 4129 | 1.15 | 5.04E-04 | 2.68E-03 |
| TTC1 | 1196 | 1.15 | 4.99E-03 | 1.96E-02 |
| CANT1 | 5185 | 1.15 | 3.09E-04 | 1.74E-03 |
| PNPLA8 | 1969 | 1.15 | 2.61E-03 | 1.13E-02 |
| CPE | 3401 | 1.15 | 1.92E-04 | 1.15E-03 |
| CD2BP2 | 3159 | 1.15 | 4.50E-04 | 2.43E-03 |
| GLS | 1152 | 1.15 | 8.55E-03 | 3.08E-02 |
| SSR1 | 3531 | 1.15 | 1.87E-03 | 8.50E-03 |
| TIMM23 | 757 | 1.15 | 1.37E-02 | 4.57E-02 |
| ZNF783 | 810 | 1.15 | 9.66E-03 | 3.40E-02 |
| SDCBP | 1380 | 1.15 | 3.94E-03 | 1.60E-02 |
| NCSTN | 1692 | 1.15 | 1.38E-03 | 6.51E-03 |
| TERF2IP | 1942 | 1.15 | 8.79E-04 | 4.39E-03 |
| LANCL1 | 2830 | 1.15 | 8.07E-04 | 4.07E-03 |
| PSAP | 9756 | 1.15 | 9.76E-06 | 7.75E-05 |
| C16orf72 | 1896 | 1.15 | 1.45E-03 | 6.78E-03 |
| AMPD2 | 1104 | 1.15 | 6.41E-03 | 2.41E-02 |
| CERS2 | 7983 | 1.15 | 2.56E-05 | 1.87E-04 |
| MAPKAPK2 | 5183 | 1.15 | 1.17E-04 | 7.36E-04 |
| ACLY | 13977 | 1.15 | 1.37E-05 | 1.06E-04 |
| BLZF1 | 1393 | 1.15 | 4.14E-03 | 1.67E-02 |
| CMBL | 1858 | 1.15 | 8.24E-04 | 4.14E-03 |
| ACSL3 | 7300 | 1.15 | 1.72E-04 | 1.04E-03 |
| NOP10 | 1248 | 1.15 | 5.87E-03 | 2.24E-02 |
| CALR | 11544 | 1.15 | 7.33E-06 | 5.98E-05 |
| CXCL16 | 956 | 1.15 | 8.73E-03 | 3.14E-02 |
| RP11-983P16.4 | 793 | 1.15 | 9.08E-03 | 3.24E-02 |
| MRPS7 | 2885 | 1.15 | 2.06E-04 | 1.22E-03 |
| CREB3 | 999 | 1.15 | 8.60E-03 | 3.10E-02 |
| SUMF1 | 1463 | 1.15 | 1.31E-03 | 6.18E-03 |
| COX4I1 | 7027 | 1.15 | 3.11E-05 | 2.24E-04 |
| NT5C3B | 882 | 1.15 | 6.99E-03 | 2.60E-02 |
| TRAF4 | 1884 | 1.15 | 9.86E-04 | 4.83E-03 |
| NDUFV3 | 1476 | 1.15 | 2.16E-03 | 9.60E-03 |
| FAM60A | 1333 | 1.15 | 2.42E-03 | 1.05E-02 |
| MRPL2 | 682 | 1.15 | 1.47E-02 | 4.83E-02 |
| C11orf80 | 946 | 1.15 | 1.06E-02 | 3.67E-02 |
| SHISA5 | 3409 | 1.15 | 2.93E-03 | 1.24E-02 |
| EZR | 4911 | 1.15 | 3.00E-05 | 2.17E-04 |
| GPS1 | 3010 | 1.15 | 9.79E-03 | 3.44E-02 |
| NUB1 | 1320 | 1.15 | 4.38E-03 | 1.75E-02 |
| FBXO22 | 1091 | 1.15 | 5.60E-03 | 2.16E-02 |
| NIT2 | 1722 | 1.15 | 2.10E-03 | 9.33E-03 |
| OAZ2 | 2107 | 1.15 | 5.17E-04 | 2.74E-03 |
| MLX | 1676 | 1.16 | 1.30E-03 | 6.17E-03 |
| C12orf23 | 1825 | 1.16 | 7.10E-04 | 3.63E-03 |
| ALOX15 | 989 | 1.16 | 6.80E-03 | 2.54E-02 |
| FKBP2 | 763 | 1.16 | 1.41E-02 | 4.67E-02 |
| COQ9 | 1089 | 1.16 | 4.49E-03 | 1.79E-02 |
| RABL5 | 1384 | 1.16 | 1.56E-03 | 7.22E-03 |
| PBDC1 | 822 | 1.16 | 9.75E-03 | 3.42E-02 |
| CIRBP | 4955 | 1.16 | 5.69E-04 | 2.98E-03 |
| ORC5 | 1321 | 1.16 | 1.78E-03 | 8.13E-03 |
| RABGGTA | 798 | 1.16 | 9.75E-03 | 3.42E-02 |
| FOXJ3 | 1577 | 1.16 | 9.73E-04 | 4.78E-03 |
| RAB5C | 1157 | 1.16 | 2.58E-03 | 1.12E-02 |
| ARF5 | 2701 | 1.16 | 9.26E-04 | 4.58E-03 |
| CDC37 | 4056 | 1.16 | 7.17E-04 | 3.66E-03 |
| GSS | 2413 | 1.16 | 2.19E-04 | 1.29E-03 |
| AKIRIN1 | 1205 | 1.16 | 2.23E-03 | 9.83E-03 |
| ARHGAP17 | 842 | 1.16 | 7.21E-03 | 2.67E-02 |
| ERGIC2 | 1123 | 1.16 | 3.37E-03 | 1.40E-02 |
| COLGALT1 | 1169 | 1.16 | 3.15E-03 | 1.33E-02 |
| RNF40 | 3896 | 1.16 | 4.13E-04 | 2.26E-03 |
| RPL36AL | 6845 | 1.16 | 1.49E-05 | 1.15E-04 |
| PXDN | 1425 | 1.16 | 2.49E-03 | 1.08E-02 |
| CLIC4 | 3371 | 1.16 | 1.81E-04 | 1.09E-03 |
| CYTH1 | 980 | 1.16 | 5.01E-03 | 1.96E-02 |
| TFG | 3137 | 1.16 | 1.28E-04 | 8.00E-04 |
| FEZ2 | 1122 | 1.16 | 2.56E-03 | 1.11E-02 |
| DSCAM-AS1 | 41147 | 1.16 | 1.96E-04 | 1.16E-03 |
| CD63 | 9948 | 1.16 | 4.77E-05 | 3.29E-04 |
| TRIM41 | 1225 | 1.16 | 3.62E-03 | 1.49E-02 |
| ATP6AP2 | 1827 | 1.16 | 5.85E-04 | 3.06E-03 |
| ZNF282 | 998 | 1.16 | 1.42E-02 | 4.70E-02 |
| BDH1 | 2227 | 1.16 | 4.07E-04 | 2.23E-03 |
| MTATP6P1 | 15287 | 1.16 | 1.37E-03 | 6.45E-03 |
| NDUFB5 | 1757 | 1.16 | 9.03E-04 | 4.49E-03 |
| SAR1B | 1796 | 1.16 | 1.00E-03 | 4.89E-03 |
| MARS | 2921 | 1.16 | 1.62E-04 | 9.84E-04 |
| LAMTOR5 | 1786 | 1.16 | 8.19E-04 | 4.12E-03 |
| PPP2R2A | 1443 | 1.16 | 9.09E-04 | 4.51E-03 |
| PTP4A1 | 4891 | 1.16 | 4.78E-05 | 3.30E-04 |
| TFRC | 11837 | 1.16 | 1.02E-04 | 6.55E-04 |
| DNAJC10 | 3618 | 1.16 | 2.25E-04 | 1.32E-03 |
| MFN2 | 2844 | 1.16 | 1.21E-04 | 7.57E-04 |
| MRGBP | 1581 | 1.16 | 3.19E-03 | 1.34E-02 |
| FIS1 | 4127 | 1.16 | 3.18E-04 | 1.79E-03 |
| GPR108 | 1026 | 1.16 | 4.54E-03 | 1.80E-02 |
| FNBP1L | 1326 | 1.16 | 2.00E-03 | 8.98E-03 |
| GREB1 | 7223 | 1.16 | 3.34E-05 | 2.38E-04 |
| WBSCR22 | 2966 | 1.16 | 7.78E-05 | 5.13E-04 |
| UQCR11 | 1071 | 1.16 | 1.02E-02 | 3.56E-02 |
| PPL | 2973 | 1.16 | 3.93E-04 | 2.16E-03 |
| FBXO42 | 681 | 1.16 | 7.85E-03 | 2.87E-02 |
| ATPAF1 | 1308 | 1.16 | 2.15E-03 | 9.56E-03 |
| HIBCH | 768 | 1.16 | 9.54E-03 | 3.37E-02 |
| SNX2 | 2165 | 1.16 | 5.05E-04 | 2.68E-03 |
| BCKDK | 1463 | 1.16 | 3.30E-03 | 1.38E-02 |
| CBX2 | 2319 | 1.16 | 6.00E-04 | 3.13E-03 |
| TMTC3 | 1260 | 1.16 | 4.39E-03 | 1.76E-02 |
| SPIRE1 | 1738 | 1.16 | 3.51E-04 | 1.96E-03 |
| ZKSCAN1 | 8468 | 1.16 | 3.73E-05 | 2.63E-04 |
| DHCR7 | 7574 | 1.16 | 9.82E-06 | 7.79E-05 |
| ME2 | 594 | 1.16 | 1.23E-02 | 4.18E-02 |
| IL17RC | 1110 | 1.16 | 5.11E-03 | 2.00E-02 |
| LARS2 | 834 | 1.16 | 6.44E-03 | 2.42E-02 |
| PLS1 | 1916 | 1.16 | 3.24E-04 | 1.82E-03 |
| GCH1 | 1199 | 1.16 | 1.56E-03 | 7.22E-03 |
| NOMO1 | 2116 | 1.16 | 9.46E-04 | 4.67E-03 |
| PIP4K2C | 3081 | 1.16 | 6.92E-05 | 4.61E-04 |
| TMCO1 | 2631 | 1.16 | 1.12E-04 | 7.07E-04 |
| TMUB2 | 862 | 1.16 | 4.63E-03 | 1.83E-02 |
| PDLIM1 | 798 | 1.16 | 9.46E-03 | 3.35E-02 |
| PROM2 | 2121 | 1.16 | 5.00E-03 | 1.96E-02 |
| TBL1XR1 | 2233 | 1.16 | 7.24E-04 | 3.70E-03 |
| CTTN | 7397 | 1.16 | 2.18E-05 | 1.61E-04 |
| C9orf91 | 1615 | 1.16 | 7.39E-04 | 3.76E-03 |
| SEL1L3 | 1554 | 1.16 | 1.07E-03 | 5.20E-03 |
| DCAF5 | 3031 | 1.16 | 8.89E-05 | 5.78E-04 |
| PMPCB | 4124 | 1.17 | 1.94E-05 | 1.45E-04 |
| SEC61G | 960 | 1.17 | 3.11E-03 | 1.31E-02 |
| AKTIP | 926 | 1.17 | 3.72E-03 | 1.52E-02 |
| P4HB | 15162 | 1.17 | 2.30E-06 | 2.07E-05 |
| HRAS | 1025 | 1.17 | 3.68E-03 | 1.51E-02 |
| CYB5D2 | 777 | 1.17 | 7.81E-03 | 2.86E-02 |
| ATP5J | 1063 | 1.17 | 6.21E-03 | 2.35E-02 |
| STOM | 1766 | 1.17 | 4.91E-04 | 2.62E-03 |
| UROS | 994 | 1.17 | 1.90E-03 | 8.59E-03 |
| TTC8 | 1409 | 1.17 | 9.14E-04 | 4.53E-03 |
| SCFD1 | 1054 | 1.17 | 2.31E-03 | 1.01E-02 |
| YTHDF1 | 2945 | 1.17 | 1.57E-04 | 9.56E-04 |
| EFNA1 | 2305 | 1.17 | 2.15E-04 | 1.27E-03 |
| PDS5B | 7431 | 1.17 | 1.36E-05 | 1.05E-04 |
| EHBP1L1 | 1447 | 1.17 | 8.44E-04 | 4.23E-03 |
| CC2D1B | 569 | 1.17 | 1.30E-02 | 4.38E-02 |
| BSDC1 | 1778 | 1.17 | 2.27E-04 | 1.33E-03 |
| IGFBP2 | 1860 | 1.17 | 1.25E-02 | 4.24E-02 |
| BUD31 | 1516 | 1.17 | 5.56E-04 | 2.92E-03 |
| CAPZA1 | 7871 | 1.17 | 1.10E-05 | 8.60E-05 |
| ITM2C | 785 | 1.17 | 4.68E-03 | 1.85E-02 |
| SCNM1 | 1290 | 1.17 | 1.87E-03 | 8.49E-03 |
| TBC1D24 | 679 | 1.17 | 7.37E-03 | 2.72E-02 |
| ANO10 | 845 | 1.17 | 5.05E-03 | 1.98E-02 |
| MCC | 1143 | 1.17 | 1.84E-03 | 8.37E-03 |
| LINC00263 | 979 | 1.17 | 3.24E-03 | 1.36E-02 |
| MRPL1 | 573 | 1.17 | 1.18E-02 | 4.04E-02 |
| DPP9 | 1160 | 1.17 | 1.89E-03 | 8.57E-03 |
| GSTM3 | 10485 | 1.17 | 1.57E-06 | 1.46E-05 |
| SLC16A6 | 514 | 1.17 | 1.52E-02 | 4.96E-02 |
| VMP1 | 9810 | 1.17 | 8.79E-06 | 7.05E-05 |
| C14orf79 | 922 | 1.17 | 2.86E-03 | 1.22E-02 |
| PXN | 5451 | 1.17 | 1.48E-04 | 9.11E-04 |
| GRHL1 | 1706 | 1.17 | 3.01E-04 | 1.70E-03 |
| PRDX5 | 3673 | 1.17 | 2.50E-04 | 1.45E-03 |
| MRPL28 | 1888 | 1.17 | 6.61E-03 | 2.48E-02 |
| GHITM | 8217 | 1.17 | 7.94E-06 | 6.43E-05 |
| WWC2 | 1702 | 1.17 | 4.41E-04 | 2.39E-03 |
| CREBL2 | 1750 | 1.17 | 2.80E-04 | 1.60E-03 |
| SIRT7 | 907 | 1.17 | 5.53E-03 | 2.14E-02 |
| SCOC | 2331 | 1.17 | 2.02E-04 | 1.20E-03 |
| TMEM59 | 3129 | 1.17 | 2.09E-05 | 1.55E-04 |
| GCDH | 644 | 1.17 | 8.11E-03 | 2.95E-02 |
| ARHGAP27 | 691 | 1.17 | 8.48E-03 | 3.07E-02 |
| NRSN2 | 996 | 1.17 | 2.98E-03 | 1.26E-02 |
| LPIN1 | 2742 | 1.17 | 1.23E-04 | 7.71E-04 |
| PSMG3-AS1 | 904 | 1.17 | 3.37E-03 | 1.40E-02 |
| PKIB | 1639 | 1.17 | 4.32E-04 | 2.35E-03 |
| SF3B14 | 2702 | 1.17 | 5.71E-05 | 3.87E-04 |
| ZSWIM8 | 1462 | 1.17 | 1.04E-03 | 5.05E-03 |
| FGFR4 | 3872 | 1.17 | 6.29E-03 | 2.38E-02 |
| AMIGO1 | 1025 | 1.17 | 1.90E-03 | 8.59E-03 |
| ASNS | 1763 | 1.17 | 4.82E-04 | 2.58E-03 |
| PFKM | 2390 | 1.17 | 1.41E-04 | 8.71E-04 |
| EXT1 | 482 | 1.17 | 1.49E-02 | 4.90E-02 |
| NELFB | 2437 | 1.17 | 4.51E-03 | 1.79E-02 |
| ATP6V0E1 | 4704 | 1.17 | 1.05E-05 | 8.27E-05 |
| STRA13 | 3471 | 1.17 | 2.24E-04 | 1.31E-03 |
| FAM162A | 1278 | 1.17 | 1.81E-03 | 8.27E-03 |
| TLE1 | 1535 | 1.17 | 1.02E-03 | 4.95E-03 |
| PI4KB | 5378 | 1.17 | 1.24E-05 | 9.58E-05 |
| AC092171.4 | 993 | 1.17 | 5.86E-03 | 2.24E-02 |
| APOA1BP | 3165 | 1.17 | 1.38E-04 | 8.50E-04 |
| RPL24 | 11310 | 1.17 | 7.23E-06 | 5.91E-05 |
| RNF167 | 2017 | 1.17 | 1.30E-04 | 8.09E-04 |
| MT-CYB | 98294 | 1.17 | 3.25E-05 | 2.33E-04 |
| IFT43 | 679 | 1.17 | 5.48E-03 | 2.12E-02 |
| NDUFS2 | 3666 | 1.17 | 2.55E-05 | 1.87E-04 |
| HTT | 4752 | 1.17 | 3.26E-05 | 2.33E-04 |
| TBC1D9B | 8017 | 1.17 | 8.22E-05 | 5.40E-04 |
| ECHS1 | 6459 | 1.17 | 6.22E-06 | 5.15E-05 |
| CREB3L4 | 6415 | 1.17 | 9.74E-06 | 7.74E-05 |
| GFM2 | 1208 | 1.18 | 1.30E-03 | 6.14E-03 |
| STK16 | 821 | 1.18 | 3.35E-03 | 1.40E-02 |
| MRPS23 | 1950 | 1.18 | 8.19E-05 | 5.38E-04 |
| FBXW11 | 2669 | 1.18 | 1.07E-04 | 6.81E-04 |
| SESN1 | 522 | 1.18 | 1.21E-02 | 4.11E-02 |
| HEXIM1 | 2152 | 1.18 | 1.64E-04 | 9.96E-04 |
| MSRB1 | 1693 | 1.18 | 4.24E-04 | 2.31E-03 |
| ABHD17B | 480 | 1.18 | 1.16E-02 | 3.96E-02 |
| LCMT1 | 1302 | 1.18 | 4.42E-04 | 2.39E-03 |
| ZNF561 | 699 | 1.18 | 3.59E-03 | 1.48E-02 |
| NEDD8 | 886 | 1.18 | 2.47E-03 | 1.07E-02 |
| DUS4L | 586 | 1.18 | 8.15E-03 | 2.96E-02 |
| TXNDC17 | 1295 | 1.18 | 4.73E-04 | 2.53E-03 |
| XYLT2 | 1394 | 1.18 | 4.04E-03 | 1.64E-02 |
| WARS | 2980 | 1.18 | 2.97E-05 | 2.15E-04 |
| EGLN1 | 812 | 1.18 | 2.32E-03 | 1.01E-02 |
| ZMYND19 | 886 | 1.18 | 3.63E-03 | 1.49E-02 |
| SLC37A3 | 593 | 1.18 | 5.96E-03 | 2.28E-02 |
| DEF8 | 1334 | 1.18 | 1.43E-03 | 6.68E-03 |
| CRELD1 | 608 | 1.18 | 5.55E-03 | 2.15E-02 |
| MAPK3 | 3379 | 1.18 | 1.39E-04 | 8.60E-04 |
| GALNT10 | 7305 | 1.18 | 4.93E-07 | 5.01E-06 |
| CAP1 | 4463 | 1.18 | 7.35E-06 | 6.00E-05 |
| MRPS22 | 945 | 1.18 | 1.93E-03 | 8.69E-03 |
| NCDN | 1037 | 1.18 | 9.74E-03 | 3.42E-02 |
| RPL26L1 | 1597 | 1.18 | 1.75E-04 | 1.06E-03 |
| MICA | 736 | 1.18 | 4.02E-03 | 1.63E-02 |
| TMEM129 | 1437 | 1.18 | 1.89E-03 | 8.55E-03 |
| LRRC42 | 836 | 1.18 | 1.93E-03 | 8.69E-03 |
| ZCCHC10 | 516 | 1.18 | 9.82E-03 | 3.44E-02 |
| SH3PXD2B | 575 | 1.18 | 9.16E-03 | 3.27E-02 |
| THOP1 | 969 | 1.18 | 6.59E-03 | 2.47E-02 |
| AFF4 | 4527 | 1.18 | 5.12E-05 | 3.51E-04 |
| FRMD8 | 890 | 1.18 | 4.23E-03 | 1.70E-02 |
| SYNJ2BP | 983 | 1.18 | 1.03E-03 | 5.00E-03 |
| TIMP3 | 1720 | 1.18 | 6.72E-04 | 3.46E-03 |
| DUS1L | 2746 | 1.18 | 3.88E-03 | 1.58E-02 |
| TMEM184B | 965 | 1.18 | 6.06E-03 | 2.30E-02 |
| TSPAN15 | 2038 | 1.18 | 4.60E-04 | 2.48E-03 |
| TACSTD2 | 2036 | 1.18 | 1.41E-03 | 6.63E-03 |
| BPNT1 | 733 | 1.18 | 4.28E-03 | 1.72E-02 |
| FAM110C | 499 | 1.18 | 9.57E-03 | 3.38E-02 |
| BCAP29 | 2357 | 1.18 | 1.37E-04 | 8.49E-04 |
| FDPS | 1920 | 1.18 | 9.62E-05 | 6.20E-04 |
| RHPN2 | 1760 | 1.18 | 1.08E-04 | 6.88E-04 |
| SIPA1L1 | 6987 | 1.18 | 8.86E-06 | 7.09E-05 |
| LRP10 | 4949 | 1.18 | 5.15E-05 | 3.53E-04 |
| NDUFB10 | 3315 | 1.18 | 2.30E-05 | 1.70E-04 |
| MLF2 | 6306 | 1.18 | 1.09E-05 | 8.56E-05 |
| NIT1 | 586 | 1.18 | 7.20E-03 | 2.66E-02 |
| NFIB | 1285 | 1.18 | 5.41E-04 | 2.86E-03 |
| TMEM69 | 575 | 1.18 | 6.55E-03 | 2.46E-02 |
| PFDN6 | 911 | 1.18 | 1.52E-03 | 7.06E-03 |
| PPP1R14B | 2392 | 1.18 | 3.45E-04 | 1.93E-03 |
| PPME1 | 1354 | 1.18 | 2.28E-04 | 1.33E-03 |
| RIOK3 | 1357 | 1.18 | 2.00E-04 | 1.19E-03 |
| COG5 | 2013 | 1.18 | 8.19E-05 | 5.38E-04 |
| PKN1 | 3073 | 1.18 | 5.65E-04 | 2.96E-03 |
| IRF2BPL | 1336 | 1.18 | 2.01E-03 | 9.00E-03 |
| CPOX | 617 | 1.18 | 3.76E-03 | 1.54E-02 |
| PFDN1 | 1108 | 1.18 | 5.35E-04 | 2.83E-03 |
| ATP7B | 699 | 1.18 | 2.64E-03 | 1.14E-02 |
| AP1S1 | 4720 | 1.19 | 8.94E-06 | 7.15E-05 |
| PGPEP1 | 1137 | 1.19 | 2.34E-03 | 1.02E-02 |
| DUSP1 | 628 | 1.19 | 6.40E-03 | 2.41E-02 |
| AK3 | 1605 | 1.19 | 2.20E-04 | 1.29E-03 |
| AGPAT1 | 486 | 1.19 | 8.72E-03 | 3.13E-02 |
| DPM1 | 2057 | 1.19 | 4.35E-05 | 3.03E-04 |
| IL4R | 484 | 1.19 | 1.11E-02 | 3.82E-02 |
| FHOD1 | 1039 | 1.19 | 2.79E-03 | 1.20E-02 |
| B4GALT3 | 847 | 1.19 | 1.04E-03 | 5.06E-03 |
| LINC00886 | 499 | 1.19 | 6.60E-03 | 2.47E-02 |
| MUL1 | 682 | 1.19 | 3.29E-03 | 1.38E-02 |
| AURKAIP1 | 1351 | 1.19 | 4.37E-03 | 1.75E-02 |
| CIAPIN1 | 1393 | 1.19 | 2.34E-04 | 1.37E-03 |
| YIPF1 | 1280 | 1.19 | 4.16E-04 | 2.28E-03 |
| TUFT1 | 1954 | 1.19 | 1.01E-04 | 6.48E-04 |
| STAU1 | 5446 | 1.19 | 2.92E-06 | 2.57E-05 |
| TMEM219 | 1461 | 1.19 | 1.78E-04 | 1.07E-03 |
| MRPL32 | 1390 | 1.19 | 1.93E-04 | 1.15E-03 |
| TUBA1A | 4837 | 1.19 | 5.49E-07 | 5.53E-06 |
| RWDD2A | 450 | 1.19 | 9.56E-03 | 3.38E-02 |
| NSUN5P1 | 493 | 1.19 | 8.48E-03 | 3.07E-02 |
| SEPT9 | 9692 | 1.19 | 2.23E-04 | 1.31E-03 |
| SWAP70 | 721 | 1.19 | 3.66E-03 | 1.51E-02 |
| ACAT2 | 1570 | 1.19 | 2.86E-04 | 1.63E-03 |
| MKNK1 | 461 | 1.19 | 9.48E-03 | 3.35E-02 |
| DDX27 | 2595 | 1.19 | 1.82E-05 | 1.37E-04 |
| RPP25L | 569 | 1.19 | 6.17E-03 | 2.34E-02 |
| RNASEH2C | 1181 | 1.19 | 2.18E-03 | 9.66E-03 |
| TSPAN14 | 2082 | 1.19 | 3.25E-05 | 2.33E-04 |
| ARFIP2 | 2168 | 1.19 | 9.07E-05 | 5.89E-04 |
| CD99 | 1415 | 1.19 | 1.66E-04 | 1.01E-03 |
| FKBP3 | 3246 | 1.19 | 6.24E-06 | 5.16E-05 |
| CIDECP | 494 | 1.19 | 7.05E-03 | 2.62E-02 |
| B4GALT7 | 716 | 1.19 | 6.63E-03 | 2.48E-02 |
| YIPF3 | 2402 | 1.19 | 2.25E-05 | 1.66E-04 |
| ZMYM5 | 455 | 1.19 | 7.70E-03 | 2.82E-02 |
| ADPRHL2 | 684 | 1.19 | 3.88E-03 | 1.58E-02 |
| SNAP47 | 759 | 1.19 | 2.26E-03 | 9.92E-03 |
| ZBTB22 | 853 | 1.19 | 9.71E-04 | 4.77E-03 |
| MYO10 | 903 | 1.19 | 1.06E-03 | 5.14E-03 |
| PHPT1 | 950 | 1.19 | 9.84E-04 | 4.82E-03 |
| WIBG | 1360 | 1.19 | 1.56E-04 | 9.49E-04 |
| RNF44 | 1791 | 1.19 | 4.69E-04 | 2.52E-03 |
| MYL12B | 19018 | 1.19 | 3.32E-08 | 4.09E-07 |
| RRAGD | 407 | 1.19 | 1.26E-02 | 4.25E-02 |
| TMEM104 | 714 | 1.19 | 9.03E-03 | 3.23E-02 |
| UBE2J2 | 685 | 1.19 | 6.86E-03 | 2.56E-02 |
| TM2D1 | 380 | 1.19 | 1.20E-02 | 4.09E-02 |
| ALAD | 1793 | 1.19 | 1.14E-04 | 7.22E-04 |
| JUP | 10191 | 1.19 | 8.83E-04 | 4.40E-03 |
| OTUB1 | 2433 | 1.19 | 2.60E-04 | 1.50E-03 |
| MAP4K2 | 603 | 1.19 | 7.60E-03 | 2.79E-02 |
| CROT | 1023 | 1.19 | 4.13E-04 | 2.26E-03 |
| UBE2G2 | 3083 | 1.19 | 4.09E-06 | 3.51E-05 |
| TCTA | 669 | 1.19 | 4.39E-03 | 1.76E-02 |
| TPI1 | 20624 | 1.19 | 3.55E-07 | 3.67E-06 |
| VDAC2 | 3329 | 1.19 | 3.20E-06 | 2.80E-05 |
| HYAL2 | 492 | 1.19 | 1.44E-02 | 4.76E-02 |
| ATP5B | 23637 | 1.19 | 4.63E-09 | 6.42E-08 |
| DNAJB2 | 1428 | 1.19 | 1.48E-04 | 9.11E-04 |
| SLC12A9 | 2238 | 1.19 | 2.13E-03 | 9.48E-03 |
| SLC26A11 | 572 | 1.19 | 6.26E-03 | 2.36E-02 |
| NDUFC1 | 1190 | 1.19 | 1.78E-04 | 1.07E-03 |
| SYPL1 | 8092 | 1.19 | 3.69E-07 | 3.81E-06 |
| SNN | 688 | 1.19 | 3.88E-03 | 1.58E-02 |
| MARCKSL1 | 3337 | 1.19 | 6.38E-05 | 4.28E-04 |
| ARHGEF37 | 435 | 1.20 | 9.74E-03 | 3.42E-02 |
| TPD52L2 | 4638 | 1.20 | 9.44E-07 | 9.15E-06 |
| ENTPD6 | 1316 | 1.20 | 5.40E-04 | 2.85E-03 |
| DFFA | 1219 | 1.20 | 2.20E-04 | 1.29E-03 |
| ABCF2 | 2464 | 1.20 | 9.90E-06 | 7.84E-05 |
| ITGA2 | 1366 | 1.20 | 4.39E-04 | 2.38E-03 |
| MT-ATP6 | 99848 | 1.20 | 8.49E-05 | 5.56E-04 |
| NDUFA5 | 1689 | 1.20 | 1.79E-04 | 1.08E-03 |
| ST6GALNAC6 | 538 | 1.20 | 5.02E-03 | 1.97E-02 |
| ITGB1 | 6691 | 1.20 | 3.39E-06 | 2.96E-05 |
| PGAM1 | 8427 | 1.20 | 2.84E-07 | 2.98E-06 |
| USB1 | 882 | 1.20 | 8.31E-04 | 4.18E-03 |
| KIF3C | 779 | 1.20 | 9.16E-04 | 4.54E-03 |
| SNAPC3 | 569 | 1.20 | 5.59E-03 | 2.16E-02 |
| PTGFRN | 4597 | 1.20 | 7.34E-06 | 5.99E-05 |
| TRIM16L | 420 | 1.20 | 9.90E-03 | 3.47E-02 |
| WDR73 | 1042 | 1.20 | 2.95E-04 | 1.68E-03 |
| SAT1 | 1047 | 1.20 | 7.30E-04 | 3.72E-03 |
| DHX29 | 1433 | 1.20 | 5.40E-05 | 3.68E-04 |
| PLA2G12A | 2560 | 1.20 | 7.84E-06 | 6.35E-05 |
| PSMA7 | 6164 | 1.20 | 1.64E-06 | 1.52E-05 |
| GRPEL1 | 1665 | 1.20 | 1.37E-04 | 8.50E-04 |
| CDK7 | 917 | 1.20 | 1.64E-03 | 7.59E-03 |
| PRDX2 | 6194 | 1.20 | 2.24E-06 | 2.02E-05 |
| NDUFS5 | 2705 | 1.20 | 1.75E-05 | 1.32E-04 |
| TMC4 | 2145 | 1.20 | 1.77E-04 | 1.07E-03 |
| DAD1 | 2150 | 1.20 | 4.88E-05 | 3.36E-04 |
| FAM46A | 1283 | 1.20 | 1.72E-04 | 1.04E-03 |
| PIGP | 446 | 1.20 | 6.75E-03 | 2.52E-02 |
| IVD | 3242 | 1.20 | 1.32E-06 | 1.24E-05 |
| LGALSL | 401 | 1.20 | 8.84E-03 | 3.17E-02 |
| UQCC1 | 1198 | 1.20 | 2.56E-04 | 1.48E-03 |
| LIMK1 | 943 | 1.20 | 5.05E-03 | 1.98E-02 |
| NSDHL | 1800 | 1.20 | 7.65E-05 | 5.05E-04 |
| ZNF710 | 591 | 1.20 | 1.17E-02 | 4.00E-02 |
| TSR1 | 2088 | 1.20 | 1.39E-05 | 1.07E-04 |
| SGSH | 1179 | 1.20 | 1.10E-03 | 5.30E-03 |
| VPS18 | 705 | 1.20 | 5.43E-03 | 2.11E-02 |
| HS6ST1 | 1775 | 1.20 | 2.64E-04 | 1.52E-03 |
| TUBB4B | 10966 | 1.20 | 3.64E-04 | 2.02E-03 |
| SIAH2 | 2279 | 1.20 | 4.18E-05 | 2.92E-04 |
| MAP2K3 | 1372 | 1.20 | 4.37E-04 | 2.37E-03 |
| AP2M1 | 12139 | 1.20 | 3.77E-08 | 4.60E-07 |
| STK40 | 1050 | 1.20 | 1.77E-03 | 8.12E-03 |
| TMEM63A | 1022 | 1.20 | 2.42E-04 | 1.41E-03 |
| ZNHIT1 | 1911 | 1.20 | 9.69E-04 | 4.76E-03 |
| STRAP | 3185 | 1.20 | 8.08E-07 | 7.92E-06 |
| VAMP8 | 2733 | 1.20 | 4.82E-06 | 4.07E-05 |
| MAST3 | 399 | 1.20 | 8.97E-03 | 3.21E-02 |
| RP11-212P7.2 | 1400 | 1.20 | 2.95E-04 | 1.68E-03 |
| N4BP1 | 819 | 1.20 | 5.32E-04 | 2.82E-03 |
| PYGL | 701 | 1.20 | 1.43E-03 | 6.70E-03 |
| SLC25A4 | 1021 | 1.20 | 3.43E-04 | 1.91E-03 |
| KRAS | 1375 | 1.20 | 1.14E-04 | 7.19E-04 |
| CUEDC1 | 450 | 1.20 | 1.11E-02 | 3.84E-02 |
| MNT | 566 | 1.20 | 3.79E-03 | 1.55E-02 |
| CFL2 | 572 | 1.20 | 4.94E-03 | 1.94E-02 |
| BAG3 | 5282 | 1.20 | 6.07E-06 | 5.04E-05 |
| MBOAT2 | 1547 | 1.20 | 3.99E-05 | 2.80E-04 |
| DENND1C | 513 | 1.20 | 3.15E-03 | 1.33E-02 |
| AFF3 | 415 | 1.20 | 5.75E-03 | 2.21E-02 |
| TMTC2 | 602 | 1.20 | 3.41E-03 | 1.42E-02 |
| FAM189B | 1285 | 1.21 | 5.01E-04 | 2.67E-03 |
| FAM213A | 2614 | 1.21 | 2.62E-06 | 2.33E-05 |
| C1orf122 | 629 | 1.21 | 2.14E-03 | 9.52E-03 |
| NDUFB3 | 1181 | 1.21 | 8.29E-05 | 5.43E-04 |
| CTSH | 607 | 1.21 | 1.88E-03 | 8.54E-03 |
| ACOT8 | 399 | 1.21 | 8.84E-03 | 3.17E-02 |
| ACOX1 | 2886 | 1.21 | 2.81E-06 | 2.48E-05 |
| TRGV9 | 396 | 1.21 | 8.03E-03 | 2.92E-02 |
| TES | 1067 | 1.21 | 1.82E-04 | 1.09E-03 |
| FAM8A1 | 1035 | 1.21 | 3.60E-04 | 2.00E-03 |
| RTCA | 392 | 1.21 | 8.05E-03 | 2.93E-02 |
| JUN | 380 | 1.21 | 1.31E-02 | 4.39E-02 |
| ZMIZ2 | 1880 | 1.21 | 6.54E-04 | 3.37E-03 |
| BRINP3 | 309 | 1.21 | 1.47E-02 | 4.84E-02 |
| FYCO1 | 1258 | 1.21 | 8.36E-05 | 5.47E-04 |
| GCC1 | 1085 | 1.21 | 4.04E-04 | 2.22E-03 |
| COPS6 | 6311 | 1.21 | 3.21E-07 | 3.34E-06 |
| DNAJC3 | 1199 | 1.21 | 1.27E-04 | 7.91E-04 |
| CALU | 4526 | 1.21 | 5.61E-07 | 5.65E-06 |
| SHC1 | 1725 | 1.21 | 8.34E-06 | 6.72E-05 |
| WDR26 | 2695 | 1.21 | 3.46E-06 | 3.01E-05 |
| FBXL3 | 1072 | 1.21 | 1.82E-04 | 1.09E-03 |
| BCKDHB | 815 | 1.21 | 6.11E-04 | 3.18E-03 |
| PRDX1 | 8736 | 1.21 | 1.75E-08 | 2.23E-07 |
| DHRS7B | 697 | 1.21 | 8.75E-04 | 4.37E-03 |
| PHLDB1 | 439 | 1.21 | 6.00E-03 | 2.29E-02 |
| ACOT9 | 722 | 1.21 | 6.88E-04 | 3.54E-03 |
| PRKRIP1 | 1467 | 1.21 | 3.17E-05 | 2.27E-04 |
| GOLGA3 | 3615 | 1.21 | 4.50E-07 | 4.60E-06 |
| GID8 | 3483 | 1.21 | 2.74E-07 | 2.87E-06 |
| POLM | 601 | 1.21 | 3.26E-03 | 1.37E-02 |
| CLDN4 | 4843 | 1.21 | 9.67E-04 | 4.75E-03 |
| PLCD3 | 1297 | 1.21 | 1.12E-03 | 5.40E-03 |
| KDELC2 | 1307 | 1.21 | 5.83E-05 | 3.94E-04 |
| AES | 1982 | 1.21 | 1.80E-05 | 1.35E-04 |
| ABHD15 | 574 | 1.21 | 1.91E-03 | 8.64E-03 |
| ATF4 | 5088 | 1.21 | 1.10E-06 | 1.05E-05 |
| C6orf203 | 446 | 1.21 | 4.32E-03 | 1.73E-02 |
| GNB2 | 14483 | 1.21 | 3.79E-04 | 2.09E-03 |
| VPS37B | 678 | 1.21 | 4.13E-03 | 1.67E-02 |
| DDX41 | 3762 | 1.21 | 3.67E-07 | 3.79E-06 |
| ECI2 | 613 | 1.21 | 1.04E-03 | 5.04E-03 |
| ACP6 | 787 | 1.21 | 3.24E-04 | 1.82E-03 |
| SPTSSB | 73882 | 1.21 | 2.13E-09 | 3.08E-08 |
| PHF20 | 1352 | 1.21 | 3.00E-05 | 2.17E-04 |
| TFAP2C | 4514 | 1.21 | 4.67E-08 | 5.59E-07 |
| PLEKHO1 | 340 | 1.21 | 9.19E-03 | 3.27E-02 |
| TMEM141 | 858 | 1.21 | 4.73E-04 | 2.53E-03 |
| PTPN1 | 3965 | 1.21 | 8.66E-08 | 9.88E-07 |
| HID1 | 8063 | 1.21 | 2.46E-05 | 1.81E-04 |
| CNPY4 | 596 | 1.21 | 2.00E-03 | 8.97E-03 |
| CCDC47 | 6955 | 1.21 | 1.27E-06 | 1.20E-05 |
| LRPAP1 | 2499 | 1.22 | 1.85E-04 | 1.11E-03 |
| RBM4 | 337 | 1.22 | 1.47E-02 | 4.84E-02 |
| ASPSCR1 | 881 | 1.22 | 3.42E-03 | 1.42E-02 |
| RBL2 | 3865 | 1.22 | 2.77E-07 | 2.90E-06 |
| C7orf43 | 604 | 1.22 | 1.45E-03 | 6.77E-03 |
| ATP5G3 | 5300 | 1.22 | 6.63E-09 | 8.98E-08 |
| ZNF862 | 671 | 1.22 | 7.15E-04 | 3.66E-03 |
| ZNF431 | 470 | 1.22 | 3.15E-03 | 1.33E-02 |
| TMEM203 | 1282 | 1.22 | 2.47E-05 | 1.81E-04 |
| ANKRD34A | 927 | 1.22 | 7.73E-04 | 3.92E-03 |
| ZKSCAN5 | 1172 | 1.22 | 4.25E-05 | 2.96E-04 |
| ARHGEF16 | 1057 | 1.22 | 1.74E-03 | 7.96E-03 |
| ATP6V0B | 1830 | 1.22 | 6.49E-06 | 5.34E-05 |
| NAMPT | 3747 | 1.22 | 1.32E-07 | 1.46E-06 |
| TXNIP | 13154 | 1.22 | 8.04E-09 | 1.08E-07 |
| IDH3G | 4279 | 1.22 | 2.03E-06 | 1.85E-05 |
| CBLB | 470 | 1.22 | 4.76E-03 | 1.88E-02 |
| UQCRB | 4240 | 1.22 | 1.05E-06 | 1.00E-05 |
| TLCD1 | 537 | 1.22 | 1.81E-03 | 8.26E-03 |
| HTATIP2 | 1490 | 1.22 | 3.55E-05 | 2.52E-04 |
| NOP14-AS1 | 591 | 1.22 | 1.63E-03 | 7.51E-03 |
| RASA3 | 1386 | 1.22 | 1.50E-05 | 1.15E-04 |
| NIPSNAP1 | 2722 | 1.22 | 2.81E-07 | 2.94E-06 |
| SEL1L | 5642 | 1.22 | 4.01E-07 | 4.12E-06 |
| CAMTA2 | 1143 | 1.22 | 4.37E-05 | 3.03E-04 |
| LRRC41 | 1466 | 1.22 | 1.20E-05 | 9.36E-05 |
| PCDHGA8 | 414 | 1.22 | 5.39E-03 | 2.09E-02 |
| DNAJA4 | 660 | 1.22 | 4.98E-04 | 2.66E-03 |
| BTBD1 | 2013 | 1.22 | 9.03E-07 | 8.78E-06 |
| TNK1 | 657 | 1.22 | 1.62E-03 | 7.50E-03 |
| USMG5 | 1481 | 1.22 | 1.06E-05 | 8.32E-05 |
| MXD4 | 1705 | 1.22 | 2.15E-03 | 9.56E-03 |
| OAZ1 | 7976 | 1.22 | 1.96E-05 | 1.46E-04 |
| KCNK1 | 610 | 1.22 | 8.00E-04 | 4.03E-03 |
| STK38L | 771 | 1.22 | 2.67E-04 | 1.53E-03 |
| GMPR2 | 2179 | 1.22 | 3.04E-06 | 2.67E-05 |
| WASF3 | 628 | 1.22 | 9.05E-04 | 4.50E-03 |
| ABR | 3557 | 1.22 | 1.85E-07 | 2.00E-06 |
| CD151 | 2940 | 1.22 | 7.45E-05 | 4.94E-04 |
| FSIP2 | 326 | 1.22 | 1.07E-02 | 3.72E-02 |
| ST3GAL4 | 935 | 1.22 | 3.29E-04 | 1.84E-03 |
| RAB11FIP4 | 1118 | 1.22 | 4.84E-05 | 3.34E-04 |
| ACTR10 | 2011 | 1.22 | 2.57E-06 | 2.29E-05 |
| DNASE1L1 | 560 | 1.22 | 1.70E-03 | 7.81E-03 |
| KLC1 | 346 | 1.22 | 7.67E-03 | 2.81E-02 |
| BAIAP2L1 | 678 | 1.22 | 7.69E-04 | 3.90E-03 |
| ESRRA | 933 | 1.22 | 5.60E-03 | 2.16E-02 |
| SLC25A11 | 2383 | 1.22 | 2.84E-05 | 2.06E-04 |
| WDR60 | 740 | 1.22 | 3.04E-04 | 1.71E-03 |
| GBA | 2574 | 1.22 | 4.87E-07 | 4.96E-06 |
| COQ5 | 1362 | 1.22 | 3.15E-05 | 2.26E-04 |
| CTNND2 | 2457 | 1.22 | 3.45E-06 | 3.01E-05 |
| MSRB2 | 879 | 1.22 | 3.97E-04 | 2.18E-03 |
| PIAS3 | 3196 | 1.22 | 1.41E-07 | 1.55E-06 |
| TMEM189 | 1159 | 1.22 | 4.16E-05 | 2.91E-04 |
| LRRC14 | 482 | 1.22 | 4.48E-03 | 1.78E-02 |
| BBX | 2335 | 1.22 | 1.51E-05 | 1.16E-04 |
| DENND2D | 2209 | 1.22 | 4.92E-06 | 4.15E-05 |
| FAHD1 | 1771 | 1.23 | 2.84E-06 | 2.50E-05 |
| PRKAR1B | 992 | 1.23 | 2.96E-03 | 1.26E-02 |
| IKBKG | 595 | 1.23 | 6.83E-03 | 2.55E-02 |
| GADD45GIP1 | 1033 | 1.23 | 7.51E-04 | 3.82E-03 |
| SRPK2 | 3895 | 1.23 | 1.10E-07 | 1.23E-06 |
| COX7B | 2621 | 1.23 | 1.58E-06 | 1.46E-05 |
| HLA-A | 365 | 1.23 | 5.62E-03 | 2.17E-02 |
| ATP6AP1 | 7910 | 1.23 | 4.72E-10 | 7.44E-09 |
| CHST11 | 305 | 1.23 | 8.94E-03 | 3.20E-02 |
| TIMMDC1 | 2183 | 1.23 | 6.27E-07 | 6.27E-06 |
| STAT1 | 4098 | 1.23 | 3.70E-06 | 3.21E-05 |
| SPAG1 | 812 | 1.23 | 2.57E-04 | 1.49E-03 |
| OSBPL2 | 1610 | 1.23 | 4.29E-06 | 3.67E-05 |
| FAM47E-STBD1 | 430 | 1.23 | 2.39E-03 | 1.04E-02 |
| MB21D2 | 492 | 1.23 | 1.35E-03 | 6.37E-03 |
| CKB | 1028 | 1.23 | 1.81E-03 | 8.27E-03 |
| GPRC5C | 798 | 1.23 | 2.02E-03 | 9.04E-03 |
| CPNE1 | 2345 | 1.23 | 1.16E-06 | 1.11E-05 |
| SIAE | 1036 | 1.23 | 2.15E-04 | 1.27E-03 |
| GM2A | 606 | 1.23 | 1.29E-03 | 6.11E-03 |
| PQLC3 | 1464 | 1.23 | 6.48E-06 | 5.34E-05 |
| ATP5E | 19808 | 1.23 | 1.13E-10 | 1.95E-09 |
| PPP6R2 | 1119 | 1.23 | 1.46E-04 | 9.00E-04 |
| TMEM25 | 328 | 1.23 | 8.42E-03 | 3.05E-02 |
| DMPK | 346 | 1.23 | 1.10E-02 | 3.79E-02 |
| NACC2 | 1127 | 1.23 | 4.51E-04 | 2.43E-03 |
| NDUFAF5 | 343 | 1.23 | 5.49E-03 | 2.13E-02 |
| CMAS | 1335 | 1.23 | 3.52E-05 | 2.50E-04 |
| ATP6V1D | 1882 | 1.23 | 2.63E-06 | 2.34E-05 |
| SERF2 | 3232 | 1.23 | 2.11E-07 | 2.25E-06 |
| OSBPL7 | 286 | 1.23 | 1.51E-02 | 4.93E-02 |
| KLC2 | 1687 | 1.23 | 4.35E-05 | 3.03E-04 |
| FAM50A | 3137 | 1.23 | 2.50E-07 | 2.64E-06 |
| ABCB8 | 787 | 1.23 | 2.97E-03 | 1.26E-02 |
| ME1 | 896 | 1.23 | 5.80E-05 | 3.93E-04 |
| PHF23 | 1488 | 1.23 | 2.31E-05 | 1.70E-04 |
| ACSS2 | 1450 | 1.23 | 7.53E-06 | 6.12E-05 |
| SMAD7 | 355 | 1.23 | 4.45E-03 | 1.77E-02 |
| NOL3 | 806 | 1.23 | 4.30E-04 | 2.34E-03 |
| TAPBP | 2306 | 1.23 | 6.24E-07 | 6.25E-06 |
| TCTN3 | 1387 | 1.23 | 5.46E-06 | 4.57E-05 |
| GNAI2 | 3462 | 1.23 | 8.41E-06 | 6.76E-05 |
| ZNF514 | 296 | 1.23 | 9.80E-03 | 3.44E-02 |
| KCTD10 | 1988 | 1.23 | 3.11E-07 | 3.24E-06 |
| THRB | 487 | 1.23 | 1.70E-03 | 7.81E-03 |
| ITFG3 | 3099 | 1.23 | 2.90E-05 | 2.10E-04 |
| C17orf58 | 912 | 1.23 | 4.31E-05 | 3.00E-04 |
| NBPF1 | 4513 | 1.23 | 2.07E-08 | 2.61E-07 |
| CNNM2 | 259 | 1.23 | 1.07E-02 | 3.72E-02 |
| EFNA3 | 877 | 1.23 | 1.54E-04 | 9.41E-04 |
| LPAR2 | 837 | 1.23 | 3.79E-04 | 2.10E-03 |
| GTPBP3 | 467 | 1.23 | 2.14E-03 | 9.50E-03 |
| ALKBH4 | 599 | 1.23 | 2.17E-03 | 9.63E-03 |
| ALDH4A1 | 960 | 1.23 | 5.89E-05 | 3.98E-04 |
| STAT3 | 3387 | 1.23 | 8.66E-09 | 1.16E-07 |
| CUL1 | 2490 | 1.23 | 5.00E-07 | 5.07E-06 |
| ATP6V1G1 | 5093 | 1.23 | 5.67E-08 | 6.68E-07 |
| KDM6B | 1099 | 1.24 | 1.65E-03 | 7.59E-03 |
| VAV1 | 340 | 1.24 | 5.54E-03 | 2.14E-02 |
| C4orf3 | 2605 | 1.24 | 1.04E-06 | 9.98E-06 |
| NME7 | 406 | 1.24 | 2.70E-03 | 1.16E-02 |
| IMPACT | 1100 | 1.24 | 1.15E-05 | 8.95E-05 |
| NAAA | 1367 | 1.24 | 5.49E-06 | 4.58E-05 |
| POFUT2 | 617 | 1.24 | 6.97E-04 | 3.57E-03 |
| MTHFR | 573 | 1.24 | 6.04E-04 | 3.14E-03 |
| DNAJC5 | 4999 | 1.24 | 1.45E-07 | 1.60E-06 |
| CELSR3 | 440 | 1.24 | 4.89E-03 | 1.92E-02 |
| PFKFB3 | 1104 | 1.24 | 1.57E-05 | 1.20E-04 |
| SEMA3C | 11188 | 1.24 | 1.29E-09 | 1.91E-08 |
| CYB5R3 | 1687 | 1.24 | 9.34E-05 | 6.05E-04 |
| RNF215 | 289 | 1.24 | 1.32E-02 | 4.43E-02 |
| NTAN1 | 610 | 1.24 | 2.98E-04 | 1.69E-03 |
| HARS2 | 1265 | 1.24 | 6.09E-06 | 5.05E-05 |
| LRP1 | 814 | 1.24 | 2.06E-04 | 1.22E-03 |
| ANO6 | 2334 | 1.24 | 2.70E-06 | 2.40E-05 |
| C2CD2L | 788 | 1.24 | 1.32E-04 | 8.18E-04 |
| KIAA0513 | 1480 | 1.24 | 3.87E-06 | 3.33E-05 |
| TP53RK | 641 | 1.24 | 3.97E-04 | 2.18E-03 |
| CSRNP1 | 769 | 1.24 | 3.04E-04 | 1.71E-03 |
| VASP | 2525 | 1.24 | 9.81E-07 | 9.47E-06 |
| TMEM63B | 1558 | 1.24 | 7.69E-06 | 6.25E-05 |
| RIOK2 | 755 | 1.24 | 9.52E-05 | 6.15E-04 |
| ITGA3 | 1958 | 1.24 | 1.23E-06 | 1.17E-05 |
| ANAPC2 | 1382 | 1.24 | 4.98E-04 | 2.65E-03 |
| LEPROT | 1352 | 1.24 | 3.14E-05 | 2.26E-04 |
| NMD3 | 16121 | 1.24 | 3.31E-11 | 6.16E-10 |
| DNM1 | 258 | 1.24 | 1.09E-02 | 3.77E-02 |
| ORAI3 | 239 | 1.24 | 1.14E-02 | 3.91E-02 |
| RHBDF1 | 1920 | 1.24 | 2.66E-04 | 1.53E-03 |
| OBFC1 | 915 | 1.24 | 6.01E-05 | 4.06E-04 |
| DTX3 | 610 | 1.24 | 2.46E-04 | 1.43E-03 |
| CCND1 | 9347 | 1.24 | 3.66E-11 | 6.78E-10 |
| PYCARD | 562 | 1.24 | 7.58E-04 | 3.85E-03 |
| KXD1 | 985 | 1.24 | 7.14E-05 | 4.75E-04 |
| ZNF329 | 288 | 1.25 | 8.21E-03 | 2.98E-02 |
| PRCP | 1720 | 1.25 | 1.78E-06 | 1.64E-05 |
| SPTBN2 | 2421 | 1.25 | 1.56E-04 | 9.49E-04 |
| BNIP2 | 1083 | 1.25 | 4.60E-05 | 3.19E-04 |
| MYPN | 239 | 1.25 | 9.38E-03 | 3.33E-02 |
| COX18 | 515 | 1.25 | 7.16E-04 | 3.66E-03 |
| ITPRIPL2 | 1037 | 1.25 | 4.28E-04 | 2.33E-03 |
| CEBPB | 422 | 1.25 | 3.25E-03 | 1.36E-02 |
| RP6-65G23.3 | 227 | 1.25 | 1.05E-02 | 3.65E-02 |
| TMED9 | 6817 | 1.25 | 1.71E-09 | 2.51E-08 |
| DPH7 | 748 | 1.25 | 8.83E-05 | 5.75E-04 |
| PIP5K1C | 543 | 1.25 | 3.73E-03 | 1.53E-02 |
| LPCAT1 | 6222 | 1.25 | 6.80E-10 | 1.05E-08 |
| POMT1 | 762 | 1.25 | 1.80E-04 | 1.08E-03 |
| EHD1 | 1134 | 1.25 | 6.67E-05 | 4.46E-04 |
| PSEN2 | 423 | 1.25 | 9.95E-04 | 4.86E-03 |
| SEZ6L2 | 2143 | 1.25 | 1.10E-04 | 6.99E-04 |
| TMEM206 | 227 | 1.25 | 9.64E-03 | 3.40E-02 |
| UNC119 | 760 | 1.25 | 5.68E-05 | 3.86E-04 |
| PRKACB | 388 | 1.25 | 2.17E-03 | 9.62E-03 |
| LRSAM1 | 894 | 1.25 | 6.24E-05 | 4.20E-04 |
| PIK3R3 | 3717 | 1.25 | 3.57E-08 | 4.37E-07 |
| NDRG3 | 1423 | 1.25 | 1.39E-06 | 1.30E-05 |
| LPIN3 | 1360 | 1.25 | 6.23E-06 | 5.16E-05 |
| BAIAP2 | 917 | 1.25 | 9.30E-04 | 4.60E-03 |
| MOCS3 | 670 | 1.25 | 2.08E-04 | 1.23E-03 |
| KIAA0391 | 2536 | 1.25 | 3.75E-07 | 3.87E-06 |
| CBS | 2460 | 1.25 | 5.39E-05 | 3.67E-04 |
| OBSL1 | 2915 | 1.25 | 5.11E-05 | 3.51E-04 |
| GOLT1A | 401 | 1.25 | 1.17E-03 | 5.62E-03 |
| HIST1H2BD | 645 | 1.25 | 3.67E-04 | 2.04E-03 |
| MINK1 | 2148 | 1.25 | 2.72E-06 | 2.41E-05 |
| CCDC120 | 397 | 1.25 | 3.25E-03 | 1.36E-02 |
| FAM160B2 | 618 | 1.25 | 1.86E-03 | 8.46E-03 |
| DRAM2 | 1024 | 1.25 | 5.59E-05 | 3.80E-04 |
| ACADS | 322 | 1.25 | 1.02E-02 | 3.56E-02 |
| GPR157 | 495 | 1.25 | 1.10E-03 | 5.32E-03 |
| SLC25A12 | 518 | 1.25 | 4.57E-04 | 2.46E-03 |
| GPR56 | 2679 | 1.25 | 1.73E-07 | 1.88E-06 |
| EIF2B2 | 1408 | 1.25 | 6.71E-07 | 6.69E-06 |
| PAWR | 4198 | 1.25 | 3.45E-10 | 5.56E-09 |
| UQCRC2 | 6941 | 1.25 | 2.27E-10 | 3.73E-09 |
| MARCH9 | 976 | 1.25 | 1.62E-05 | 1.23E-04 |
| IGSF8 | 207 | 1.25 | 1.42E-02 | 4.71E-02 |
| MOCS1 | 366 | 1.25 | 1.79E-03 | 8.17E-03 |
| BNIP3L | 1777 | 1.25 | 8.80E-07 | 8.57E-06 |
| RP4-758J18.13 | 194 | 1.25 | 1.53E-02 | 5.00E-02 |
| PQLC2 | 307 | 1.25 | 5.86E-03 | 2.24E-02 |
| GALNT11 | 1004 | 1.25 | 6.62E-06 | 5.44E-05 |
| RGS19 | 553 | 1.25 | 3.73E-03 | 1.53E-02 |
| AGAP3 | 1810 | 1.25 | 4.38E-05 | 3.04E-04 |
| DDRGK1 | 839 | 1.25 | 5.24E-05 | 3.58E-04 |
| AC144450.2 | 449 | 1.25 | 1.62E-03 | 7.50E-03 |
| LINC00998 | 705 | 1.25 | 9.55E-05 | 6.17E-04 |
| ST3GAL5 | 230 | 1.25 | 7.83E-03 | 2.86E-02 |
| IKBIP | 336 | 1.25 | 2.22E-03 | 9.80E-03 |
| ABCG2 | 1190 | 1.25 | 2.94E-06 | 2.58E-05 |
| AHR | 1056 | 1.25 | 2.91E-05 | 2.11E-04 |
| HIF1A | 4076 | 1.25 | 4.27E-09 | 5.95E-08 |
| EDF1 | 5422 | 1.25 | 1.14E-07 | 1.28E-06 |
| ITFG1 | 1083 | 1.25 | 1.35E-05 | 1.04E-04 |
| ETV5 | 224 | 1.25 | 8.95E-03 | 3.21E-02 |
| TRAF2 | 964 | 1.25 | 6.96E-05 | 4.64E-04 |
| SSH3 | 3251 | 1.25 | 7.22E-06 | 5.91E-05 |
| TXNDC9 | 788 | 1.25 | 4.46E-05 | 3.09E-04 |
| PARS2 | 183 | 1.26 | 1.38E-02 | 4.60E-02 |
| ELK3 | 402 | 1.26 | 1.18E-03 | 5.65E-03 |
| GCAT | 357 | 1.26 | 3.96E-03 | 1.61E-02 |
| LMLN | 446 | 1.26 | 1.18E-03 | 5.64E-03 |
| TMEM79 | 444 | 1.26 | 1.08E-03 | 5.23E-03 |
| ZKSCAN4 | 182 | 1.26 | 1.48E-02 | 4.87E-02 |
| KCTD17 | 296 | 1.26 | 7.16E-03 | 2.65E-02 |
| APRT | 3724 | 1.26 | 3.12E-05 | 2.25E-04 |
| TCP11L1 | 373 | 1.26 | 1.20E-03 | 5.75E-03 |
| TCF7L2 | 474 | 1.26 | 4.30E-04 | 2.34E-03 |
| MARCH2 | 359 | 1.26 | 3.10E-03 | 1.31E-02 |
| C7orf13 | 263 | 1.26 | 4.54E-03 | 1.80E-02 |
| SHANK2 | 2381 | 1.26 | 5.80E-09 | 7.91E-08 |
| EPN2 | 692 | 1.26 | 1.92E-04 | 1.15E-03 |
| TAZ | 574 | 1.26 | 3.23E-04 | 1.81E-03 |
| TBC1D9 | 7034 | 1.26 | 2.54E-10 | 4.13E-09 |
| FLNB | 5253 | 1.26 | 5.85E-10 | 9.13E-09 |
| GAREM | 422 | 1.26 | 1.12E-03 | 5.39E-03 |
| LSM14B | 2812 | 1.26 | 8.65E-08 | 9.88E-07 |
| CTSA | 1737 | 1.26 | 5.43E-07 | 5.49E-06 |
| TPO | 316 | 1.26 | 3.11E-03 | 1.31E-02 |
| AKAP8L | 940 | 1.26 | 1.63E-05 | 1.24E-04 |
| FOXA1 | 9085 | 1.26 | 1.69E-10 | 2.82E-09 |
| ST14 | 2418 | 1.26 | 5.74E-05 | 3.89E-04 |
| KDM5B | 6320 | 1.26 | 2.85E-09 | 4.04E-08 |
| D2HGDH | 518 | 1.26 | 3.93E-03 | 1.60E-02 |
| C7orf60 | 479 | 1.26 | 7.00E-04 | 3.59E-03 |
| RANBP9 | 2235 | 1.26 | 4.98E-08 | 5.92E-07 |
| DNAJC4 | 635 | 1.26 | 1.46E-04 | 8.98E-04 |
| SCN1B | 238 | 1.26 | 9.31E-03 | 3.31E-02 |
| EXD3 | 298 | 1.26 | 7.88E-03 | 2.88E-02 |
| TMEM120B | 530 | 1.26 | 2.02E-04 | 1.20E-03 |
| RAC3 | 853 | 1.26 | 2.85E-03 | 1.22E-02 |
| OCIAD2 | 788 | 1.26 | 1.85E-05 | 1.39E-04 |
| CHST14 | 769 | 1.26 | 1.86E-05 | 1.39E-04 |
| SCRN2 | 1064 | 1.26 | 3.71E-05 | 2.62E-04 |
| YES1 | 2126 | 1.26 | 2.85E-08 | 3.54E-07 |
| MRPL47 | 825 | 1.26 | 1.28E-05 | 9.90E-05 |
| PAQR7 | 216 | 1.26 | 6.87E-03 | 2.56E-02 |
| TMED4 | 2385 | 1.26 | 1.71E-08 | 2.20E-07 |
| VPS9D1 | 347 | 1.26 | 4.52E-03 | 1.80E-02 |
| MTURN | 380 | 1.26 | 1.28E-03 | 6.08E-03 |
| KHNYN | 2044 | 1.26 | 2.04E-08 | 2.58E-07 |
| B4GALNT4 | 425 | 1.26 | 2.54E-03 | 1.10E-02 |
| DDIT4 | 483 | 1.27 | 6.44E-03 | 2.42E-02 |
| OPTN | 446 | 1.27 | 4.94E-04 | 2.64E-03 |
| TP53I3 | 398 | 1.27 | 7.60E-04 | 3.86E-03 |
| HTRA1 | 314 | 1.27 | 1.93E-03 | 8.69E-03 |
| RALBP1 | 3425 | 1.27 | 9.75E-11 | 1.70E-09 |
| GALC | 1213 | 1.27 | 9.82E-07 | 9.47E-06 |
| SLC25A3 | 10686 | 1.27 | 9.86E-14 | 2.41E-12 |
| RAB20 | 317 | 1.27 | 2.24E-03 | 9.86E-03 |
| TMCC1 | 1357 | 1.27 | 1.02E-06 | 9.76E-06 |
| MFSD3 | 486 | 1.27 | 7.68E-03 | 2.82E-02 |
| ADAM15 | 3433 | 1.27 | 1.17E-07 | 1.30E-06 |
| HSPA4 | 4014 | 1.27 | 1.59E-10 | 2.67E-09 |
| TRIM14 | 1279 | 1.27 | 8.29E-07 | 8.10E-06 |
| IQSEC1 | 2439 | 1.27 | 1.40E-07 | 1.54E-06 |
| CYB5D1 | 948 | 1.27 | 6.16E-05 | 4.15E-04 |
| PRKAG2 | 402 | 1.27 | 6.49E-04 | 3.35E-03 |
| ORMDL3 | 1533 | 1.27 | 1.06E-07 | 1.20E-06 |
| WRN | 657 | 1.27 | 7.96E-05 | 5.24E-04 |
| SUMF2 | 2837 | 1.27 | 3.30E-09 | 4.62E-08 |
| NBPF4 | 200 | 1.27 | 9.32E-03 | 3.31E-02 |
| ADCY6 | 3945 | 1.27 | 1.65E-10 | 2.76E-09 |
| FRMD4B | 185 | 1.27 | 1.06E-02 | 3.67E-02 |
| CD27-AS1 | 552 | 1.27 | 1.16E-04 | 7.34E-04 |
| SPIN2B | 178 | 1.27 | 1.34E-02 | 4.49E-02 |
| CAST | 1794 | 1.27 | 1.08E-07 | 1.21E-06 |
| GABBR1 | 261 | 1.27 | 4.13E-03 | 1.67E-02 |
| FGFR1OP2 | 1133 | 1.27 | 3.85E-06 | 3.32E-05 |
| RFNG | 366 | 1.27 | 5.37E-03 | 2.09E-02 |
| MRPS36 | 763 | 1.27 | 1.51E-05 | 1.15E-04 |
| RASA4 | 404 | 1.27 | 6.21E-04 | 3.22E-03 |
| NAT9 | 886 | 1.27 | 6.43E-06 | 5.30E-05 |
| NUDT18 | 315 | 1.27 | 2.09E-03 | 9.32E-03 |
| RHOBTB1 | 173 | 1.27 | 1.04E-02 | 3.63E-02 |
| SLC39A1 | 9353 | 1.27 | 4.64E-11 | 8.48E-10 |
| OCEL1 | 212 | 1.27 | 9.40E-03 | 3.33E-02 |
| TECPR2 | 1289 | 1.27 | 3.66E-06 | 3.17E-05 |
| TSPAN17 | 2798 | 1.27 | 2.37E-08 | 2.97E-07 |
| CLN8 | 1076 | 1.27 | 8.08E-07 | 7.92E-06 |
| OSBPL6 | 532 | 1.27 | 1.41E-04 | 8.71E-04 |
| FAM84A | 1839 | 1.27 | 4.77E-08 | 5.69E-07 |
| COL5A1 | 326 | 1.27 | 1.84E-03 | 8.36E-03 |
| TNFAIP1 | 1384 | 1.27 | 1.20E-07 | 1.34E-06 |
| RIMS3 | 286 | 1.27 | 2.88E-03 | 1.23E-02 |
| MPZL3 | 718 | 1.27 | 5.05E-05 | 3.47E-04 |
| LIG4 | 429 | 1.27 | 2.07E-03 | 9.25E-03 |
| BCAP31 | 13668 | 1.27 | 7.73E-13 | 1.75E-11 |
| ERGIC3 | 5523 | 1.28 | 1.41E-11 | 2.75E-10 |
| MGAT4B | 4361 | 1.28 | 1.25E-08 | 1.63E-07 |
| TPRG1L | 1028 | 1.28 | 9.69E-07 | 9.37E-06 |
| DSTN | 12722 | 1.28 | 1.09E-13 | 2.65E-12 |
| LYPLA2 | 1206 | 1.28 | 6.66E-05 | 4.45E-04 |
| TMEM38A | 189 | 1.28 | 9.53E-03 | 3.37E-02 |
| ZFP3 | 391 | 1.28 | 5.55E-04 | 2.92E-03 |
| SLC6A9 | 283 | 1.28 | 3.40E-03 | 1.41E-02 |
| S100A16 | 16730 | 1.28 | 9.54E-11 | 1.67E-09 |
| NDUFS4 | 819 | 1.28 | 5.41E-06 | 4.52E-05 |
| SNX6 | 1918 | 1.28 | 4.80E-09 | 6.62E-08 |
| SIL1 | 813 | 1.28 | 1.27E-04 | 7.91E-04 |
| PARP8 | 336 | 1.28 | 1.24E-03 | 5.91E-03 |
| HM13 | 3934 | 1.28 | 6.42E-12 | 1.31E-10 |
| ATP8B2 | 5568 | 1.28 | 1.48E-12 | 3.25E-11 |
| FLNA | 40003 | 1.28 | 2.61E-06 | 2.33E-05 |
| PPOX | 360 | 1.28 | 1.03E-03 | 5.00E-03 |
| VAT1 | 1745 | 1.28 | 1.80E-08 | 2.30E-07 |
| UQCRQ | 2162 | 1.28 | 5.44E-08 | 6.41E-07 |
| RP11-54O7.3 | 632 | 1.28 | 2.17E-04 | 1.28E-03 |
| ATP6V1F | 1717 | 1.28 | 1.02E-07 | 1.15E-06 |
| DDA1 | 564 | 1.28 | 1.43E-04 | 8.83E-04 |
| ETFA | 7915 | 1.28 | 1.13E-12 | 2.52E-11 |
| ATP5J2 | 2266 | 1.28 | 1.81E-08 | 2.30E-07 |
| CXorf38 | 257 | 1.28 | 2.11E-03 | 9.39E-03 |
| MSMO1 | 2675 | 1.28 | 3.68E-08 | 4.49E-07 |
| OSBPL1A | 770 | 1.28 | 9.95E-06 | 7.88E-05 |
| SLC44A2 | 7648 | 1.28 | 3.70E-14 | 9.35E-13 |
| STAP2 | 1367 | 1.28 | 2.48E-07 | 2.62E-06 |
| IMPDH1 | 3711 | 1.28 | 6.30E-08 | 7.36E-07 |
| ANXA2 | 8094 | 1.28 | 3.25E-14 | 8.27E-13 |
| FDFT1 | 4734 | 1.28 | 8.18E-11 | 1.45E-09 |
| SLC7A2 | 11576 | 1.28 | 2.01E-11 | 3.84E-10 |
| UCKL1 | 744 | 1.28 | 1.87E-04 | 1.12E-03 |
| SYTL2 | 12015 | 1.28 | 8.42E-12 | 1.69E-10 |
| RIT1 | 1040 | 1.28 | 1.41E-06 | 1.32E-05 |
| NFS1 | 952 | 1.28 | 7.95E-07 | 7.82E-06 |
| ORAI2 | 1621 | 1.28 | 1.16E-06 | 1.10E-05 |
| KDM4B | 655 | 1.28 | 9.11E-04 | 4.52E-03 |
| BLCAP | 1442 | 1.29 | 1.55E-08 | 1.99E-07 |
| ROMO1 | 1111 | 1.29 | 1.05E-04 | 6.68E-04 |
| MYCBP2 | 6122 | 1.29 | 1.21E-08 | 1.59E-07 |
| SLC26A6 | 348 | 1.29 | 5.40E-04 | 2.86E-03 |
| ANXA9 | 2708 | 1.29 | 3.62E-11 | 6.72E-10 |
| KIAA1161 | 1077 | 1.29 | 1.89E-07 | 2.04E-06 |
| CYB5R1 | 2292 | 1.29 | 2.18E-10 | 3.58E-09 |
| CTC-228N24.3 | 964 | 1.29 | 6.95E-07 | 6.91E-06 |
| USP36 | 2244 | 1.29 | 1.07E-09 | 1.60E-08 |
| DBNL | 3243 | 1.29 | 1.05E-09 | 1.57E-08 |
| PDE8A | 2789 | 1.29 | 3.12E-10 | 5.04E-09 |
| C19orf70 | 556 | 1.29 | 4.76E-04 | 2.55E-03 |
| SLC39A8 | 1434 | 1.29 | 8.84E-08 | 1.01E-06 |
| ACAP3 | 559 | 1.29 | 1.07E-03 | 5.17E-03 |
| CERCAM | 1983 | 1.29 | 1.35E-08 | 1.75E-07 |
| FAH | 762 | 1.29 | 1.04E-05 | 8.21E-05 |
| BRI3 | 348 | 1.29 | 6.09E-04 | 3.17E-03 |
| NDUFB4 | 2296 | 1.29 | 1.69E-09 | 2.47E-08 |
| SLC29A2 | 1385 | 1.29 | 7.03E-07 | 6.98E-06 |
| TMEM134 | 929 | 1.29 | 4.93E-04 | 2.64E-03 |
| FAM214B | 251 | 1.29 | 1.95E-03 | 8.78E-03 |
| FREM2 | 2823 | 1.29 | 1.29E-07 | 1.44E-06 |
| RP11-84A19.2 | 142 | 1.29 | 1.52E-02 | 4.98E-02 |
| TMEM99 | 216 | 1.29 | 4.23E-03 | 1.70E-02 |
| ZNF433 | 304 | 1.29 | 1.01E-03 | 4.94E-03 |
| SRC | 629 | 1.29 | 2.15E-05 | 1.60E-04 |
| LSM10 | 766 | 1.29 | 9.57E-06 | 7.61E-05 |
| FLII | 5672 | 1.29 | 8.18E-08 | 9.37E-07 |
| ZNF354A | 884 | 1.29 | 1.19E-06 | 1.13E-05 |
| ATXN7L1 | 473 | 1.29 | 8.63E-05 | 5.63E-04 |
| MEGF9 | 1801 | 1.29 | 2.22E-09 | 3.19E-08 |
| TRANK1 | 355 | 1.29 | 5.27E-04 | 2.80E-03 |
| SLC38A7 | 444 | 1.29 | 1.34E-04 | 8.32E-04 |
| PLOD3 | 2210 | 1.29 | 9.16E-10 | 1.39E-08 |
| VAPA | 3491 | 1.29 | 4.63E-12 | 9.57E-11 |
| ERBB2 | 10329 | 1.29 | 1.05E-11 | 2.08E-10 |
| KIF1C | 7842 | 1.29 | 1.16E-10 | 1.99E-09 |
| ERO1L | 1117 | 1.29 | 7.83E-07 | 7.71E-06 |
| BTC | 172 | 1.29 | 7.49E-03 | 2.76E-02 |
| NRBP2 | 251 | 1.29 | 8.03E-03 | 2.93E-02 |
| SLC37A1 | 1783 | 1.29 | 6.33E-09 | 8.59E-08 |
| PAM | 635 | 1.29 | 4.23E-05 | 2.95E-04 |
| TREX1 | 152 | 1.29 | 1.51E-02 | 4.95E-02 |
| MTG2 | 1314 | 1.29 | 8.88E-08 | 1.01E-06 |
| BCAR3 | 637 | 1.29 | 1.09E-05 | 8.53E-05 |
| CARKD | 1081 | 1.29 | 3.36E-07 | 3.49E-06 |
| SMPD2 | 362 | 1.30 | 7.04E-04 | 3.60E-03 |
| MVK | 1496 | 1.30 | 1.01E-07 | 1.14E-06 |
| SBDS | 2448 | 1.30 | 1.75E-08 | 2.23E-07 |
| PSD4 | 2827 | 1.30 | 1.07E-10 | 1.85E-09 |
| TECPR1 | 520 | 1.30 | 1.31E-03 | 6.19E-03 |
| MARC1 | 680 | 1.30 | 2.21E-05 | 1.64E-04 |
| PPM1M | 204 | 1.30 | 3.29E-03 | 1.38E-02 |
| IRF7 | 285 | 1.30 | 7.35E-03 | 2.71E-02 |
| NMI | 423 | 1.30 | 1.14E-04 | 7.22E-04 |
| REXO2 | 327 | 1.30 | 4.54E-04 | 2.45E-03 |
| GCA | 1478 | 1.30 | 3.76E-08 | 4.59E-07 |
| NUCB2 | 5567 | 1.30 | 8.52E-11 | 1.50E-09 |
| LINC00888 | 283 | 1.30 | 9.40E-04 | 4.64E-03 |
| RWDD2B | 714 | 1.30 | 5.69E-06 | 4.74E-05 |
| SUFU | 797 | 1.30 | 1.34E-06 | 1.26E-05 |
| NDRG4 | 255 | 1.30 | 1.78E-03 | 8.14E-03 |
| PLXNA3 | 1499 | 1.30 | 7.55E-06 | 6.14E-05 |
| TRPT1 | 708 | 1.30 | 6.95E-06 | 5.70E-05 |
| AHDC1 | 241 | 1.30 | 1.18E-02 | 4.04E-02 |
| RRP36 | 1514 | 1.30 | 8.61E-09 | 1.15E-07 |
| C21orf33 | 4291 | 1.30 | 8.29E-13 | 1.87E-11 |
| CASP8 | 600 | 1.30 | 5.22E-05 | 3.57E-04 |
| PTTG1IP | 6468 | 1.30 | 1.32E-14 | 3.55E-13 |
| IRF6 | 587 | 1.30 | 5.94E-05 | 4.02E-04 |
| ABLIM1 | 1270 | 1.30 | 3.37E-07 | 3.50E-06 |
| MOB3A | 442 | 1.30 | 1.57E-04 | 9.57E-04 |
| PREX1 | 132417 | 1.30 | 1.45E-12 | 3.20E-11 |
| CLTB | 2914 | 1.30 | 9.86E-07 | 9.51E-06 |
| KLHL2 | 503 | 1.30 | 3.99E-05 | 2.80E-04 |
| PACS1 | 6239 | 1.30 | 6.50E-11 | 1.17E-09 |
| MYO1C | 10544 | 1.30 | 2.81E-12 | 5.93E-11 |
| CMYA5 | 643 | 1.30 | 2.79E-05 | 2.03E-04 |
| CELSR2 | 4911 | 1.30 | 1.10E-09 | 1.64E-08 |
| NDUFAF1 | 358 | 1.30 | 3.67E-04 | 2.04E-03 |
| IFITM3 | 2682 | 1.30 | 4.62E-06 | 3.92E-05 |
| PSMD5 | 2620 | 1.30 | 8.14E-11 | 1.44E-09 |
| B3GAT3 | 904 | 1.30 | 1.23E-04 | 7.71E-04 |
| C21orf2 | 279 | 1.30 | 6.01E-03 | 2.29E-02 |
| EFCAB4A | 612 | 1.30 | 3.56E-04 | 1.98E-03 |
| ZNF253 | 334 | 1.30 | 4.47E-04 | 2.42E-03 |
| CAMK2B | 392 | 1.30 | 5.42E-04 | 2.86E-03 |
| OPRL1 | 139 | 1.30 | 1.32E-02 | 4.43E-02 |
| KRBA1 | 241 | 1.30 | 3.19E-03 | 1.34E-02 |
| AMZ1 | 709 | 1.30 | 3.42E-06 | 2.98E-05 |
| HERPUD1 | 1097 | 1.30 | 1.22E-07 | 1.35E-06 |
| SLC4A2 | 3788 | 1.30 | 5.29E-03 | 2.06E-02 |
| RNF11 | 1943 | 1.31 | 2.52E-09 | 3.61E-08 |
| TMEM223 | 592 | 1.31 | 1.83E-05 | 1.37E-04 |
| SLC41A2 | 422 | 1.31 | 2.73E-04 | 1.56E-03 |
| HSPB1 | 13198 | 1.31 | 1.42E-02 | 4.70E-02 |
| SAMD4A | 991 | 1.31 | 1.34E-06 | 1.26E-05 |
| AC003102.3 | 574 | 1.31 | 1.74E-05 | 1.31E-04 |
| ARHGEF38 | 374 | 1.31 | 1.87E-04 | 1.12E-03 |
| CDH24 | 400 | 1.31 | 5.69E-04 | 2.98E-03 |
| C8orf82 | 710 | 1.31 | 2.89E-05 | 2.10E-04 |
| EHD3 | 985 | 1.31 | 1.24E-07 | 1.38E-06 |
| PPIC | 1923 | 1.31 | 5.26E-10 | 8.23E-09 |
| QKI | 2082 | 1.31 | 9.66E-11 | 1.69E-09 |
| COPZ2 | 260 | 1.31 | 1.26E-03 | 6.00E-03 |
| ZDHHC8 | 370 | 1.31 | 4.75E-03 | 1.87E-02 |
| ARID3A | 478 | 1.31 | 9.12E-05 | 5.92E-04 |
| TPMT | 693 | 1.31 | 5.57E-06 | 4.64E-05 |
| YBEY | 252 | 1.31 | 9.89E-04 | 4.84E-03 |
| REPIN1 | 3151 | 1.31 | 6.78E-08 | 7.89E-07 |
| SHISA4 | 177 | 1.31 | 4.81E-03 | 1.90E-02 |
| ASPH | 1457 | 1.31 | 9.50E-09 | 1.26E-07 |
| APBB3 | 140 | 1.31 | 1.18E-02 | 4.03E-02 |
| HCCS | 1046 | 1.31 | 1.87E-07 | 2.02E-06 |
| GPC6 | 404 | 1.31 | 9.97E-05 | 6.40E-04 |
| ZNFX1 | 2719 | 1.31 | 3.87E-10 | 6.20E-09 |
| SOX2 | 329 | 1.31 | 2.96E-04 | 1.68E-03 |
| PRPF40B | 310 | 1.31 | 3.54E-04 | 1.97E-03 |
| CASD1 | 1280 | 1.31 | 2.57E-08 | 3.21E-07 |
| NEK6 | 1647 | 1.31 | 2.94E-09 | 4.16E-08 |
| MAN2B1 | 1332 | 1.31 | 5.37E-08 | 6.35E-07 |
| DOK4 | 370 | 1.31 | 2.70E-04 | 1.55E-03 |
| ETS2 | 1020 | 1.31 | 1.67E-07 | 1.82E-06 |
| UGDH | 6571 | 1.31 | 8.19E-13 | 1.85E-11 |
| TRMT2A | 565 | 1.31 | 4.39E-05 | 3.04E-04 |
| ARPC1B | 3776 | 1.31 | 1.73E-10 | 2.87E-09 |
| DUSP3 | 2806 | 1.31 | 9.53E-12 | 1.89E-10 |
| KLHL17 | 206 | 1.31 | 7.85E-03 | 2.87E-02 |
| TMPRSS3 | 260 | 1.31 | 1.56E-03 | 7.24E-03 |
| RABL3 | 1206 | 1.31 | 1.20E-07 | 1.34E-06 |
| CCDC64B | 466 | 1.31 | 4.71E-04 | 2.53E-03 |
| ATP6V0E2 | 1319 | 1.31 | 1.20E-05 | 9.36E-05 |
| LEPRE1 | 231 | 1.31 | 1.25E-03 | 5.96E-03 |
| ULBP2 | 299 | 1.31 | 4.58E-04 | 2.47E-03 |
| C1orf86 | 239 | 1.31 | 7.56E-03 | 2.78E-02 |
| IFITM1 | 166 | 1.31 | 9.14E-03 | 3.26E-02 |
| GPR137B | 360 | 1.31 | 2.06E-04 | 1.22E-03 |
| FAM117A | 548 | 1.31 | 8.06E-06 | 6.52E-05 |
| GRB10 | 167 | 1.31 | 4.10E-03 | 1.66E-02 |
| CPNE4 | 396 | 1.31 | 1.04E-04 | 6.67E-04 |
| SAMD10 | 297 | 1.31 | 1.08E-03 | 5.24E-03 |
| CRIM1 | 1705 | 1.31 | 3.10E-09 | 4.37E-08 |
| HLA-B | 355 | 1.32 | 2.01E-04 | 1.19E-03 |
| MISP | 2203 | 1.32 | 1.42E-06 | 1.32E-05 |
| MTERFD2 | 733 | 1.32 | 8.86E-07 | 8.63E-06 |
| GPT2 | 1154 | 1.32 | 9.90E-08 | 1.12E-06 |
| KRT15 | 757 | 1.32 | 6.98E-07 | 6.93E-06 |
| GAS8 | 718 | 1.32 | 8.26E-07 | 8.09E-06 |
| KLLN | 128 | 1.32 | 9.07E-03 | 3.24E-02 |
| PLA2G15 | 473 | 1.32 | 3.11E-05 | 2.24E-04 |
| C19orf10 | 1077 | 1.32 | 4.29E-08 | 5.18E-07 |
| CACNB3 | 2080 | 1.32 | 1.07E-09 | 1.60E-08 |
| CRYZ | 727 | 1.32 | 1.89E-06 | 1.73E-05 |
| ZBTB46 | 358 | 1.32 | 5.84E-04 | 3.05E-03 |
| IRF5 | 206 | 1.32 | 2.43E-03 | 1.06E-02 |
| GRAMD4 | 957 | 1.32 | 4.89E-07 | 4.97E-06 |
| JDP2 | 499 | 1.32 | 5.23E-05 | 3.57E-04 |
| TSPAN31 | 1393 | 1.32 | 1.53E-09 | 2.25E-08 |
| ZIC5 | 129 | 1.32 | 1.05E-02 | 3.64E-02 |
| MINA | 650 | 1.32 | 9.57E-06 | 7.61E-05 |
| NAALADL2 | 238 | 1.32 | 2.28E-03 | 1.00E-02 |
| FEZ1 | 204 | 1.32 | 2.23E-03 | 9.81E-03 |
| SH3BGRL3 | 1081 | 1.32 | 1.50E-07 | 1.65E-06 |
| LMAN2 | 5236 | 1.32 | 1.31E-07 | 1.45E-06 |
| CCDC125 | 1248 | 1.32 | 6.09E-09 | 8.30E-08 |
| LOH12CR1 | 193 | 1.32 | 2.16E-03 | 9.59E-03 |
| CNKSR3 | 118 | 1.32 | 1.27E-02 | 4.30E-02 |
| CCDC24 | 270 | 1.32 | 2.32E-03 | 1.01E-02 |
| RNFT1 | 941 | 1.32 | 1.32E-06 | 1.25E-05 |
| MNX1 | 262 | 1.32 | 9.67E-04 | 4.75E-03 |
| IL17RD | 96 | 1.32 | 1.51E-02 | 4.93E-02 |
| RP11-313J2.1 | 232 | 1.32 | 2.51E-03 | 1.09E-02 |
| ATOX1 | 1632 | 1.32 | 1.22E-10 | 2.08E-09 |
| OXSM | 675 | 1.32 | 2.39E-06 | 2.15E-05 |
| FGFRL1 | 893 | 1.32 | 1.87E-05 | 1.40E-04 |
| CPEB2 | 334 | 1.33 | 1.88E-04 | 1.13E-03 |
| FANK1 | 147 | 1.33 | 4.63E-03 | 1.83E-02 |
| MYL6 | 12556 | 1.33 | 7.51E-17 | 2.51E-15 |
| MPP3 | 208 | 1.33 | 2.05E-03 | 9.18E-03 |
| RNF181 | 1707 | 1.33 | 8.47E-10 | 1.29E-08 |
| YPEL3 | 983 | 1.33 | 4.26E-05 | 2.97E-04 |
| SNAI3-AS1 | 105 | 1.33 | 1.30E-02 | 4.39E-02 |
| PCDHGB1 | 209 | 1.33 | 2.03E-03 | 9.10E-03 |
| SOWAHB | 394 | 1.33 | 6.24E-05 | 4.20E-04 |
| TM7SF3 | 5073 | 1.33 | 8.48E-16 | 2.53E-14 |
| SUSD1 | 136 | 1.33 | 5.93E-03 | 2.26E-02 |
| POMGNT1 | 1314 | 1.33 | 1.24E-09 | 1.84E-08 |
| UBE3C | 4615 | 1.33 | 8.88E-13 | 2.00E-11 |
| ZNF607 | 216 | 1.33 | 1.54E-03 | 7.17E-03 |
| ANKZF1 | 838 | 1.33 | 4.92E-07 | 5.00E-06 |
| GALT | 199 | 1.33 | 1.56E-03 | 7.23E-03 |
| PIGZ | 230 | 1.33 | 9.99E-04 | 4.88E-03 |
| TENC1 | 972 | 1.33 | 1.42E-06 | 1.33E-05 |
| PITPNA | 3273 | 1.33 | 8.40E-15 | 2.28E-13 |
| RET | 5683 | 1.33 | 1.16E-15 | 3.43E-14 |
| LGALS1 | 1704 | 1.33 | 2.55E-08 | 3.18E-07 |
| RDX | 1677 | 1.33 | 5.07E-11 | 9.22E-10 |
| MXRA7 | 422 | 1.33 | 3.40E-05 | 2.42E-04 |
| TRIP10 | 410 | 1.34 | 2.37E-05 | 1.74E-04 |
| JAK2 | 537 | 1.34 | 7.67E-06 | 6.23E-05 |
| SLC9A5 | 121 | 1.34 | 9.30E-03 | 3.30E-02 |
| BATF | 891 | 1.34 | 2.76E-06 | 2.45E-05 |
| PLGRKT | 516 | 1.34 | 3.82E-06 | 3.30E-05 |
| RNF170 | 379 | 1.34 | 3.53E-05 | 2.50E-04 |
| TMEM86A | 87 | 1.34 | 1.46E-02 | 4.82E-02 |
| LYRM9 | 97 | 1.34 | 1.19E-02 | 4.06E-02 |
| INTU | 111 | 1.34 | 9.27E-03 | 3.29E-02 |
| ARFGAP1 | 2232 | 1.34 | 1.33E-07 | 1.47E-06 |
| PAOX | 160 | 1.34 | 3.12E-03 | 1.31E-02 |
| PKM | 29768 | 1.34 | 1.82E-15 | 5.24E-14 |
| MAL2 | 6620 | 1.34 | 3.44E-17 | 1.19E-15 |
| LRCH4 | 1931 | 1.34 | 6.00E-03 | 2.29E-02 |
| THBS1 | 5985 | 1.34 | 1.09E-15 | 3.23E-14 |
| MYL12A | 5764 | 1.34 | 9.10E-17 | 3.01E-15 |
| QDPR | 1429 | 1.34 | 2.73E-10 | 4.43E-09 |
| ARFGAP3 | 509 | 1.34 | 1.02E-05 | 8.03E-05 |
| HLA-C | 969 | 1.34 | 2.45E-08 | 3.06E-07 |
| ETNK2 | 407 | 1.34 | 2.08E-05 | 1.55E-04 |
| ZNF736 | 503 | 1.34 | 9.55E-06 | 7.61E-05 |
| MAPK12 | 304 | 1.34 | 2.71E-04 | 1.56E-03 |
| LINC01006 | 101 | 1.34 | 1.01E-02 | 3.53E-02 |
| DNAJB9 | 545 | 1.34 | 2.73E-06 | 2.43E-05 |
| SLC16A9 | 90 | 1.34 | 1.36E-02 | 4.53E-02 |
| KRCC1 | 1234 | 1.34 | 8.08E-10 | 1.24E-08 |
| ANKRD12 | 1227 | 1.34 | 3.36E-08 | 4.13E-07 |
| STT3B | 6361 | 1.34 | 1.40E-14 | 3.74E-13 |
| MIEF2 | 444 | 1.34 | 2.60E-04 | 1.50E-03 |
| DBN1 | 2654 | 1.34 | 8.12E-03 | 2.96E-02 |
| SLC25A45 | 289 | 1.34 | 2.38E-04 | 1.39E-03 |
| NMNAT1 | 269 | 1.34 | 3.47E-04 | 1.94E-03 |
| MORN4 | 205 | 1.34 | 1.16E-03 | 5.58E-03 |
| PKP2 | 1299 | 1.35 | 1.21E-09 | 1.80E-08 |
| FAAH2 | 412 | 1.35 | 1.31E-05 | 1.01E-04 |
| SLC22A17 | 95 | 1.35 | 1.14E-02 | 3.92E-02 |
| MCCC1 | 1678 | 1.35 | 1.80E-11 | 3.46E-10 |
| PEX11A | 458 | 1.35 | 5.60E-06 | 4.67E-05 |
| UBA52 | 10462 | 1.35 | 8.36E-15 | 2.28E-13 |
| TBC1D2 | 436 | 1.35 | 8.61E-05 | 5.63E-04 |
| PRR15L | 910 | 1.35 | 9.19E-09 | 1.22E-07 |
| UBE2E2 | 594 | 1.35 | 9.53E-07 | 9.23E-06 |
| VEGFA | 851 | 1.35 | 3.52E-08 | 4.31E-07 |
| NEBL | 3638 | 1.35 | 8.76E-13 | 1.98E-11 |
| GSAP | 344 | 1.35 | 4.65E-05 | 3.22E-04 |
| LRRC73 | 127 | 1.35 | 5.19E-03 | 2.03E-02 |
| C1QTNF6 | 1840 | 1.35 | 4.46E-12 | 9.23E-11 |
| MIA3 | 1608 | 1.35 | 3.56E-11 | 6.62E-10 |
| GPR176 | 190 | 1.35 | 1.00E-03 | 4.90E-03 |
| RP11-132A1.4 | 172 | 1.35 | 1.55E-03 | 7.18E-03 |
| NXN | 182 | 1.35 | 1.90E-03 | 8.61E-03 |
| MX1 | 102 | 1.35 | 8.52E-03 | 3.08E-02 |
| NHS | 284 | 1.35 | 3.17E-04 | 1.78E-03 |
| CLDN7 | 3282 | 1.35 | 3.31E-14 | 8.42E-13 |
| PICK1 | 376 | 1.35 | 1.08E-04 | 6.87E-04 |
| NFKB2 | 1195 | 1.35 | 2.21E-09 | 3.18E-08 |
| TMEM198 | 99 | 1.35 | 1.15E-02 | 3.95E-02 |
| MCCC2 | 10347 | 1.35 | 1.16E-17 | 4.19E-16 |
| IFI35 | 528 | 1.36 | 3.71E-06 | 3.21E-05 |
| GYG2 | 290 | 1.36 | 8.22E-05 | 5.40E-04 |
| TICAM1 | 198 | 1.36 | 1.84E-03 | 8.39E-03 |
| FAM65C | 1090 | 1.36 | 1.27E-06 | 1.19E-05 |
| ACAA1 | 1309 | 1.36 | 6.53E-10 | 1.01E-08 |
| TNKS1BP1 | 1660 | 1.36 | 1.63E-09 | 2.40E-08 |
| GTF2E1 | 931 | 1.36 | 2.72E-09 | 3.87E-08 |
| ZNF283 | 80 | 1.36 | 1.38E-02 | 4.60E-02 |
| CTD-2228K2.7 | 116 | 1.36 | 1.28E-02 | 4.32E-02 |
| ABCA2 | 4292 | 1.36 | 1.54E-07 | 1.68E-06 |
| AC009403.2 | 131 | 1.36 | 4.66E-03 | 1.84E-02 |
| CORO1A | 209 | 1.36 | 2.35E-03 | 1.02E-02 |
| PLEKHA2 | 523 | 1.36 | 3.81E-06 | 3.30E-05 |
| FAM131A | 350 | 1.36 | 1.36E-04 | 8.43E-04 |
| FXYD3 | 2499 | 1.36 | 1.63E-12 | 3.55E-11 |
| PAPLN | 118 | 1.36 | 4.48E-03 | 1.78E-02 |
| TAF13 | 1419 | 1.36 | 1.58E-11 | 3.07E-10 |
| ARHGEF4 | 111 | 1.36 | 5.87E-03 | 2.25E-02 |
| C9orf9 | 128 | 1.36 | 3.61E-03 | 1.49E-02 |
| SGCB | 477 | 1.36 | 1.72E-06 | 1.59E-05 |
| SH3BGRL | 4336 | 1.36 | 1.02E-14 | 2.76E-13 |
| EGFR | 136 | 1.36 | 2.84E-03 | 1.21E-02 |
| CAPN1 | 5264 | 1.36 | 5.68E-11 | 1.03E-09 |
| ANKRD42 | 487 | 1.36 | 2.33E-06 | 2.10E-05 |
| ZBTB4 | 2523 | 1.36 | 4.46E-13 | 1.03E-11 |
| PISD | 1714 | 1.36 | 2.41E-12 | 5.15E-11 |
| APP | 9496 | 1.36 | 3.36E-21 | 1.67E-19 |
| ASAH1 | 2680 | 1.36 | 7.00E-16 | 2.12E-14 |
| ZFYVE1 | 1218 | 1.36 | 8.12E-11 | 1.44E-09 |
| PDGFB | 965 | 1.36 | 1.50E-08 | 1.94E-07 |
| CTD-2196E14.9 | 382 | 1.36 | 1.70E-05 | 1.29E-04 |
| GPR158 | 181 | 1.36 | 9.75E-04 | 4.78E-03 |
| GRIK3 | 143 | 1.37 | 2.44E-03 | 1.06E-02 |
| FAM114A1 | 623 | 1.37 | 9.18E-07 | 8.92E-06 |
| PSTPIP2 | 400 | 1.37 | 3.19E-05 | 2.29E-04 |
| IGBP1 | 1539 | 1.37 | 3.97E-12 | 8.27E-11 |
| SPRY3 | 143 | 1.37 | 2.47E-03 | 1.07E-02 |
| DUSP4 | 3901 | 1.37 | 3.55E-16 | 1.11E-14 |
| RNF32 | 158 | 1.37 | 1.83E-03 | 8.32E-03 |
| C22orf29 | 986 | 1.37 | 2.75E-09 | 3.90E-08 |
| FN3K | 223 | 1.37 | 2.86E-04 | 1.63E-03 |
| SH3TC1 | 132 | 1.37 | 7.82E-03 | 2.86E-02 |
| PPP4R1 | 2851 | 1.37 | 1.68E-16 | 5.50E-15 |
| UPK2 | 802 | 1.37 | 8.29E-07 | 8.10E-06 |
| SDSL | 643 | 1.37 | 1.72E-07 | 1.86E-06 |
| DNAJC30 | 481 | 1.37 | 1.41E-06 | 1.32E-05 |
| TMEM45B | 428 | 1.37 | 8.88E-06 | 7.11E-05 |
| IFIH1 | 1206 | 1.37 | 7.24E-10 | 1.11E-08 |
| ADAMTSL5 | 122 | 1.37 | 6.65E-03 | 2.49E-02 |
| ID3 | 1340 | 1.37 | 1.76E-06 | 1.62E-05 |
| HIGD1A | 1028 | 1.37 | 4.43E-09 | 6.14E-08 |
| ADAP2 | 74 | 1.37 | 1.28E-02 | 4.33E-02 |
| GNS | 5831 | 1.37 | 1.18E-14 | 3.17E-13 |
| LRRC3DN | 96 | 1.37 | 1.07E-02 | 3.71E-02 |
| TXNRD1 | 5263 | 1.37 | 1.10E-18 | 4.29E-17 |
| LRRC3 | 98 | 1.37 | 6.19E-03 | 2.34E-02 |
| ZNF185 | 1204 | 1.37 | 2.66E-11 | 5.05E-10 |
| KIAA1211L | 197 | 1.37 | 4.17E-04 | 2.28E-03 |
| AEBP1 | 174 | 1.37 | 8.76E-04 | 4.37E-03 |
| CERK | 365 | 1.37 | 1.26E-05 | 9.80E-05 |
| SFXN3 | 947 | 1.37 | 1.23E-09 | 1.82E-08 |
| TFF3 | 1888 | 1.37 | 4.24E-03 | 1.70E-02 |
| KLHDC8B | 186 | 1.37 | 6.11E-04 | 3.18E-03 |
| PCBP3 | 174 | 1.37 | 7.89E-04 | 3.99E-03 |
| MIDN | 1708 | 1.37 | 1.42E-07 | 1.57E-06 |
| KRT19 | 53261 | 1.38 | 2.85E-12 | 6.00E-11 |
| LATS2 | 1051 | 1.38 | 4.71E-10 | 7.44E-09 |
| ZNF821 | 370 | 1.38 | 1.03E-05 | 8.11E-05 |
| FAM200A | 310 | 1.38 | 3.30E-05 | 2.36E-04 |
| KLF6 | 366 | 1.38 | 2.29E-05 | 1.69E-04 |
| MFSD12 | 623 | 1.38 | 7.47E-07 | 7.39E-06 |
| IPPK | 445 | 1.38 | 2.73E-06 | 2.42E-05 |
| SLC25A1 | 3433 | 1.38 | 1.27E-14 | 3.41E-13 |
| TAP1 | 819 | 1.38 | 2.71E-08 | 3.37E-07 |
| GNG7 | 125 | 1.38 | 4.43E-03 | 1.77E-02 |
| PDK1 | 556 | 1.38 | 1.16E-06 | 1.11E-05 |
| SH2D3A | 365 | 1.38 | 7.34E-05 | 4.87E-04 |
| HOMER3 | 140 | 1.38 | 1.94E-03 | 8.72E-03 |
| RHOC | 4500 | 1.38 | 7.90E-12 | 1.60E-10 |
| FECH | 1523 | 1.38 | 1.71E-12 | 3.72E-11 |
| GATA2 | 302 | 1.38 | 1.27E-04 | 7.92E-04 |
| CAPN2 | 555 | 1.38 | 1.23E-06 | 1.17E-05 |
| SLC4A3 | 198 | 1.38 | 6.19E-04 | 3.22E-03 |
| GAPDH | 57607 | 1.38 | 1.90E-20 | 8.76E-19 |
| DGCR11 | 59 | 1.38 | 1.47E-02 | 4.85E-02 |
| RHOB | 8849 | 1.39 | 2.39E-10 | 3.92E-09 |
| DIRAS1 | 104 | 1.39 | 4.22E-03 | 1.70E-02 |
| SEC11C | 817 | 1.39 | 4.31E-09 | 6.00E-08 |
| LINC00423 | 250 | 1.39 | 6.79E-05 | 4.53E-04 |
| TRMT10C | 1250 | 1.39 | 6.10E-11 | 1.10E-09 |
| BX322557.10 | 408 | 1.39 | 4.65E-06 | 3.95E-05 |
| ADAP1 | 119 | 1.39 | 9.11E-03 | 3.25E-02 |
| GYLTL1B | 80 | 1.39 | 8.95E-03 | 3.21E-02 |
| RIMKLA | 302 | 1.39 | 3.37E-05 | 2.40E-04 |
| PKIA | 604 | 1.39 | 3.82E-08 | 4.64E-07 |
| LSS | 5982 | 1.39 | 1.48E-17 | 5.27E-16 |
| FER1L4 | 228 | 1.39 | 3.15E-04 | 1.77E-03 |
| ATP6AP1L | 114 | 1.39 | 5.61E-03 | 2.17E-02 |
| AGR2 | 8535 | 1.39 | 1.02E-17 | 3.73E-16 |
| HIC2 | 93 | 1.39 | 6.96E-03 | 2.59E-02 |
| IDUA | 186 | 1.39 | 1.27E-03 | 6.01E-03 |
| HPS3 | 3398 | 1.39 | 1.01E-18 | 3.99E-17 |
| PRICKLE2 | 465 | 1.39 | 1.49E-06 | 1.38E-05 |
| BMI1 | 2007 | 1.39 | 2.60E-13 | 6.11E-12 |
| TMEM184A | 1862 | 1.39 | 1.40E-07 | 1.54E-06 |
| ARHGDIG | 263 | 1.39 | 7.89E-04 | 3.98E-03 |
| ZNF197 | 254 | 1.39 | 9.13E-05 | 5.92E-04 |
| DLD | 8256 | 1.39 | 5.14E-20 | 2.29E-18 |
| RBMS1 | 1716 | 1.39 | 4.37E-15 | 1.21E-13 |
| PLEKHA6 | 3993 | 1.39 | 1.06E-17 | 3.87E-16 |
| SLC2A10 | 704 | 1.40 | 2.32E-09 | 3.34E-08 |
| SLC12A7 | 1077 | 1.40 | 1.50E-08 | 1.94E-07 |
| MICAL1 | 293 | 1.40 | 1.11E-04 | 7.03E-04 |
| UBA5 | 2982 | 1.40 | 3.48E-15 | 9.73E-14 |
| TXNRD2 | 1087 | 1.40 | 1.06E-07 | 1.20E-06 |
| POLD4 | 329 | 1.40 | 4.93E-05 | 3.40E-04 |
| FBXO16 | 66 | 1.40 | 1.19E-02 | 4.06E-02 |
| PAXIP1-AS2 | 139 | 1.40 | 1.09E-03 | 5.27E-03 |
| SDC1 | 3251 | 1.40 | 1.29E-11 | 2.54E-10 |
| ADIRF-AS1 | 201 | 1.40 | 2.94E-04 | 1.67E-03 |
| SEMA4G | 61 | 1.40 | 1.16E-02 | 3.98E-02 |
| KLHL7 | 769 | 1.40 | 8.85E-10 | 1.35E-08 |
| TOM1L2 | 3070 | 1.40 | 3.98E-16 | 1.23E-14 |
| C4orf36 | 170 | 1.40 | 4.07E-04 | 2.23E-03 |
| GALNS | 800 | 1.40 | 1.77E-09 | 2.59E-08 |
| ZG16B | 1513 | 1.40 | 1.75E-12 | 3.80E-11 |
| RHOD | 897 | 1.40 | 4.23E-07 | 4.33E-06 |
| MPZL2 | 1506 | 1.40 | 9.87E-14 | 2.41E-12 |
| QSOX1 | 3210 | 1.40 | 8.34E-18 | 3.06E-16 |
| RASA4CP | 201 | 1.40 | 1.93E-04 | 1.15E-03 |
| TOMM40L | 424 | 1.40 | 1.31E-06 | 1.24E-05 |
| CHCHD10 | 262 | 1.40 | 3.63E-05 | 2.57E-04 |
| ANXA3 | 275 | 1.40 | 2.87E-05 | 2.08E-04 |
| RAB31 | 1029 | 1.40 | 1.62E-11 | 3.13E-10 |
| PIK3R2 | 4042 | 1.40 | 1.08E-10 | 1.86E-09 |
| ANXA6 | 7744 | 1.40 | 5.04E-22 | 2.66E-20 |
| ZNF555 | 139 | 1.40 | 1.66E-03 | 7.67E-03 |
| OAS1 | 263 | 1.40 | 1.15E-03 | 5.53E-03 |
| DCUN1D5 | 703 | 1.40 | 6.95E-09 | 9.38E-08 |
| MAST1 | 134 | 1.40 | 1.72E-03 | 7.88E-03 |
| SSR4 | 4342 | 1.40 | 1.82E-14 | 4.76E-13 |
| PKD1L2 | 51 | 1.41 | 1.40E-02 | 4.66E-02 |
| COMMD3 | 294 | 1.41 | 1.73E-05 | 1.31E-04 |
| BCL2L1 | 3220 | 1.41 | 5.82E-15 | 1.60E-13 |
| RAB3A | 126 | 1.41 | 2.17E-03 | 9.63E-03 |
| FSCN2 | 97 | 1.41 | 4.15E-03 | 1.67E-02 |
| C14orf1 | 3185 | 1.41 | 2.35E-17 | 8.23E-16 |
| MYLK-AS1 | 58 | 1.41 | 1.31E-02 | 4.39E-02 |
| TLDC1 | 884 | 1.41 | 1.21E-10 | 2.07E-09 |
| NUDT17 | 206 | 1.41 | 1.63E-04 | 9.92E-04 |
| S100A11 | 10606 | 1.41 | 4.14E-20 | 1.86E-18 |
| ZNF552 | 518 | 1.41 | 4.74E-08 | 5.66E-07 |
| KIAA0040 | 1787 | 1.41 | 3.01E-15 | 8.56E-14 |
| FADS1 | 2992 | 1.41 | 3.20E-16 | 1.01E-14 |
| OPLAH | 199 | 1.41 | 3.59E-03 | 1.48E-02 |
| GPR153 | 294 | 1.41 | 1.03E-04 | 6.57E-04 |
| ASS1 | 2229 | 1.41 | 2.60E-15 | 7.40E-14 |
| DAPK3 | 692 | 1.41 | 7.56E-07 | 7.48E-06 |
| EEF1A2 | 15991 | 1.41 | 2.44E-04 | 1.42E-03 |
| ZBED1 | 540 | 1.41 | 1.71E-06 | 1.58E-05 |
| AOX1 | 405 | 1.41 | 8.05E-07 | 7.90E-06 |
| STIM1 | 482 | 1.41 | 8.15E-08 | 9.36E-07 |
| ATP2A3 | 14522 | 1.41 | 1.26E-10 | 2.15E-09 |
| ZNF462 | 893 | 1.41 | 1.61E-10 | 2.69E-09 |
| AK4 | 2104 | 1.41 | 1.77E-13 | 4.23E-12 |
| CHPF2 | 1083 | 1.42 | 2.10E-09 | 3.04E-08 |
| TMCO3 | 1379 | 1.42 | 3.36E-14 | 8.53E-13 |
| STAMBPL1 | 150 | 1.42 | 5.33E-04 | 2.83E-03 |
| ARFRP1 | 858 | 1.42 | 3.31E-07 | 3.44E-06 |
| NT5C2 | 1126 | 1.42 | 1.41E-12 | 3.11E-11 |
| PWWP2B | 523 | 1.42 | 8.96E-05 | 5.82E-04 |
| AMDHD2 | 214 | 1.42 | 1.85E-03 | 8.43E-03 |
| DGKQ | 443 | 1.42 | 5.12E-05 | 3.51E-04 |
| TBC1D30 | 2740 | 1.42 | 5.50E-20 | 2.44E-18 |
| ITGA5 | 274 | 1.42 | 7.54E-05 | 5.00E-04 |
| TPT1-AS1 | 71 | 1.42 | 6.16E-03 | 2.34E-02 |
| MAN1B1 | 2729 | 1.42 | 1.71E-17 | 6.06E-16 |
| OSBPL9 | 3341 | 1.42 | 1.01E-20 | 4.83E-19 |
| CTB-171A8.1 | 52 | 1.42 | 1.12E-02 | 3.86E-02 |
| LTBP2 | 297 | 1.42 | 2.33E-05 | 1.72E-04 |
| BMP7 | 8442 | 1.42 | 4.40E-20 | 1.97E-18 |
| PPM1K | 293 | 1.42 | 3.26E-05 | 2.33E-04 |
| DNAJC12 | 157 | 1.42 | 5.44E-04 | 2.87E-03 |
| C19orf26 | 65 | 1.42 | 1.46E-02 | 4.81E-02 |
| LDLRAD4 | 2538 | 1.42 | 4.36E-19 | 1.80E-17 |
| ACSF2 | 1764 | 1.42 | 6.96E-14 | 1.72E-12 |
| RP1-90J20.12 | 164 | 1.42 | 4.32E-04 | 2.35E-03 |
| AP006222.2 | 188 | 1.42 | 1.27E-04 | 7.91E-04 |
| PRSS16 | 239 | 1.42 | 4.38E-05 | 3.04E-04 |
| EPHB4 | 5398 | 1.42 | 1.44E-14 | 3.83E-13 |
| TMEM120A | 1040 | 1.43 | 1.09E-11 | 2.15E-10 |
| PGK1 | 19071 | 1.43 | 3.40E-23 | 1.92E-21 |
| GYG1 | 2762 | 1.43 | 5.41E-19 | 2.21E-17 |
| NOS1AP | 91 | 1.43 | 4.42E-03 | 1.76E-02 |
| ICAM1 | 100 | 1.43 | 2.30E-03 | 1.01E-02 |
| ASUN | 1758 | 1.43 | 7.19E-16 | 2.17E-14 |
| HSH2D | 869 | 1.43 | 4.31E-11 | 7.91E-10 |
| SP110 | 343 | 1.43 | 3.36E-06 | 2.94E-05 |
| LINC00205 | 361 | 1.43 | 6.07E-07 | 6.10E-06 |
| CDKN1B | 2380 | 1.43 | 1.24E-17 | 4.45E-16 |
| KCNG1 | 206 | 1.43 | 6.72E-05 | 4.49E-04 |
| FASTK | 1406 | 1.43 | 6.86E-08 | 7.98E-07 |
| FBXL2 | 107 | 1.43 | 1.78E-03 | 8.13E-03 |
| PANX2 | 57 | 1.43 | 1.51E-02 | 4.95E-02 |
| SLC50A1 | 4174 | 1.43 | 1.09E-21 | 5.62E-20 |
| NECAB3 | 455 | 1.43 | 5.18E-07 | 5.24E-06 |
| ODC1 | 4773 | 1.43 | 3.21E-24 | 1.97E-22 |
| SPINT1 | 2520 | 1.43 | 5.03E-18 | 1.87E-16 |
| PI4KAP2 | 159 | 1.43 | 2.20E-04 | 1.29E-03 |
| CACNA1H | 3472 | 1.43 | 3.04E-04 | 1.71E-03 |
| C16orf62 | 398 | 1.43 | 4.87E-07 | 4.96E-06 |
| PCYT2 | 2077 | 1.44 | 4.84E-11 | 8.82E-10 |
| TNFAIP3 | 44 | 1.44 | 1.45E-02 | 4.80E-02 |
| SCARA3 | 833 | 1.44 | 4.44E-10 | 7.03E-09 |
| S100A10 | 11676 | 1.44 | 4.77E-29 | 3.74E-27 |
| TAPT1 | 1268 | 1.44 | 2.37E-13 | 5.60E-12 |
| EPHA2 | 209 | 1.44 | 9.15E-05 | 5.93E-04 |
| CASC10 | 186 | 1.44 | 9.53E-05 | 6.16E-04 |
| PDLIM2 | 198 | 1.44 | 5.81E-04 | 3.04E-03 |
| CPPED1 | 404 | 1.44 | 2.15E-07 | 2.29E-06 |
| CDC42BPG | 1453 | 1.44 | 2.88E-08 | 3.58E-07 |
| CNIH3 | 94 | 1.44 | 1.84E-03 | 8.36E-03 |
| LZTS3 | 86 | 1.44 | 2.84E-03 | 1.21E-02 |
| INHA | 258 | 1.44 | 9.86E-05 | 6.35E-04 |
| ZNF527 | 40 | 1.44 | 1.28E-02 | 4.31E-02 |
| SLFN5 | 305 | 1.44 | 5.22E-06 | 4.37E-05 |
| NOTCH1 | 440 | 1.44 | 5.76E-05 | 3.90E-04 |
| ZNF467 | 400 | 1.44 | 1.11E-05 | 8.71E-05 |
| MRC2 | 57 | 1.44 | 8.32E-03 | 3.02E-02 |
| CYP26B1 | 89 | 1.44 | 2.80E-03 | 1.20E-02 |
| CTTNBP2 | 40 | 1.44 | 1.26E-02 | 4.27E-02 |
| FUOM | 107 | 1.44 | 2.36E-03 | 1.03E-02 |
| C1orf170 | 54 | 1.44 | 1.17E-02 | 4.01E-02 |
| C1orf85 | 775 | 1.44 | 6.47E-10 | 1.00E-08 |
| SMPD1 | 519 | 1.44 | 1.28E-08 | 1.66E-07 |
| CTRB2 | 35 | 1.44 | 1.47E-02 | 4.84E-02 |
| APOL2 | 450 | 1.44 | 4.70E-08 | 5.61E-07 |
| CEP19 | 117 | 1.44 | 9.20E-04 | 4.56E-03 |
| HSCB | 481 | 1.45 | 1.71E-08 | 2.20E-07 |
| CPQ | 116 | 1.45 | 9.86E-04 | 4.83E-03 |
| CTA-292E10.6 | 50 | 1.45 | 8.63E-03 | 3.11E-02 |
| IRX4 | 109 | 1.45 | 1.59E-03 | 7.37E-03 |
| LGALS3 | 1763 | 1.45 | 9.68E-16 | 2.87E-14 |
| IFIT2 | 43 | 1.45 | 1.32E-02 | 4.44E-02 |
| PSD | 84 | 1.45 | 4.12E-03 | 1.66E-02 |
| SYDE1 | 77 | 1.45 | 3.31E-03 | 1.38E-02 |
| RP11-465B22.3 | 84 | 1.45 | 3.21E-03 | 1.35E-02 |
| TRNP1 | 131 | 1.45 | 4.31E-04 | 2.35E-03 |
| TMSB10 | 9497 | 1.45 | 1.12E-21 | 5.75E-20 |
| ST8SIA4 | 1437 | 1.45 | 2.18E-16 | 7.06E-15 |
| TNFRSF21 | 250 | 1.45 | 2.74E-05 | 2.00E-04 |
| AKR1C2 | 37 | 1.45 | 1.25E-02 | 4.22E-02 |
| TTC39A | 2268 | 1.45 | 4.04E-20 | 1.82E-18 |
| EXOC3L1 | 46 | 1.46 | 1.05E-02 | 3.64E-02 |
| RGAG4 | 138 | 1.46 | 4.72E-04 | 2.53E-03 |
| ZNF90 | 29 | 1.46 | 1.49E-02 | 4.89E-02 |
| ELL2 | 459 | 1.46 | 3.20E-08 | 3.94E-07 |
| ADAM9 | 2220 | 1.46 | 1.00E-19 | 4.37E-18 |
| LOXL2 | 66 | 1.46 | 5.19E-03 | 2.03E-02 |
| HIST1H2BC | 100 | 1.46 | 1.22E-03 | 5.83E-03 |
| RARA | 1543 | 1.46 | 5.38E-09 | 7.37E-08 |
| COLQ | 34 | 1.46 | 1.28E-02 | 4.33E-02 |
| HEY1 | 91 | 1.46 | 1.59E-03 | 7.36E-03 |
| PHACTR2 | 2532 | 1.46 | 1.85E-18 | 7.09E-17 |
| TRIM36 | 631 | 1.46 | 1.41E-10 | 2.38E-09 |
| LRRC37A4P | 328 | 1.46 | 1.68E-06 | 1.55E-05 |
| KRT32 | 40 | 1.46 | 1.05E-02 | 3.66E-02 |
| MNX1-AS1 | 224 | 1.46 | 1.60E-05 | 1.22E-04 |
| HCG4 | 26 | 1.46 | 1.53E-02 | 4.98E-02 |
| AC144831.1 | 171 | 1.46 | 6.68E-05 | 4.46E-04 |
| PRSS22 | 413 | 1.46 | 4.19E-06 | 3.59E-05 |
| TTYH2 | 52 | 1.46 | 6.58E-03 | 2.47E-02 |
| LMCD1 | 1281 | 1.46 | 1.69E-14 | 4.46E-13 |
| TRAF5 | 577 | 1.46 | 2.24E-09 | 3.22E-08 |
| STX1A | 215 | 1.46 | 8.94E-05 | 5.81E-04 |
| ZNF296 | 48 | 1.46 | 9.00E-03 | 3.22E-02 |
| SLC25A30 | 2499 | 1.46 | 3.82E-17 | 1.31E-15 |
| AL450992.2 | 133 | 1.47 | 3.71E-04 | 2.05E-03 |
| CRISPLD2 | 140 | 1.47 | 2.01E-04 | 1.19E-03 |
| TFF1 | 33616 | 1.47 | 1.24E-20 | 5.88E-19 |
| RBMS2 | 232 | 1.47 | 1.54E-05 | 1.17E-04 |
| ZNF816 | 209 | 1.47 | 3.61E-05 | 2.56E-04 |
| HSD17B1 | 279 | 1.47 | 3.88E-06 | 3.34E-05 |
| BTN3A1 | 36 | 1.47 | 1.02E-02 | 3.57E-02 |
| GOLM1 | 939 | 1.47 | 7.68E-13 | 1.75E-11 |
| B3GNT4 | 121 | 1.47 | 1.15E-03 | 5.52E-03 |
| CEACAM7 | 38 | 1.47 | 9.54E-03 | 3.37E-02 |
| CARD14 | 340 | 1.47 | 1.93E-06 | 1.76E-05 |
| ERBB4 | 1833 | 1.47 | 1.42E-15 | 4.17E-14 |
| DGCR6L | 1218 | 1.47 | 1.74E-08 | 2.22E-07 |
| HAR1A | 15 | 1.47 | 1.44E-02 | 4.75E-02 |
| TIFA | 538 | 1.47 | 2.50E-08 | 3.13E-07 |
| S100A6 | 4855 | 1.47 | 2.83E-23 | 1.61E-21 |
| C3orf70 | 171 | 1.47 | 8.25E-05 | 5.41E-04 |
| RP11-275F13.1 | 63 | 1.47 | 3.35E-03 | 1.40E-02 |
| PDIA2 | 24 | 1.48 | 1.36E-02 | 4.53E-02 |
| TTC21A | 122 | 1.48 | 3.01E-04 | 1.70E-03 |
| RNF223 | 445 | 1.48 | 7.00E-07 | 6.96E-06 |
| PXMP4 | 1063 | 1.48 | 2.21E-14 | 5.72E-13 |
| RAB24 | 52 | 1.48 | 7.46E-03 | 2.74E-02 |
| RP11-845M18.7 | 15 | 1.48 | 1.35E-02 | 4.50E-02 |
| ZNF91 | 463 | 1.48 | 3.30E-08 | 4.06E-07 |
| TWF2 | 152 | 1.48 | 8.22E-04 | 4.13E-03 |
| LINC00514 | 35 | 1.48 | 9.38E-03 | 3.33E-02 |
| RAPGEF6 | 961 | 1.48 | 7.77E-13 | 1.76E-11 |
| DUSP10 | 114 | 1.48 | 5.63E-04 | 2.96E-03 |
| CD164L2 | 18 | 1.48 | 1.33E-02 | 4.47E-02 |
| RSPH1 | 146 | 1.48 | 1.51E-04 | 9.23E-04 |
| EPPK1 | 1302 | 1.48 | 1.67E-08 | 2.14E-07 |
| PTPLA | 696 | 1.48 | 6.69E-10 | 1.03E-08 |
| ZNF98 | 42 | 1.48 | 6.97E-03 | 2.59E-02 |
| SPRY1 | 80 | 1.48 | 2.20E-03 | 9.71E-03 |
| MAPK8IP1 | 354 | 1.48 | 7.30E-07 | 7.22E-06 |
| DNAJC1 | 2164 | 1.49 | 7.34E-23 | 4.09E-21 |
| NFIA | 550 | 1.49 | 1.28E-09 | 1.90E-08 |
| ZNF883 | 43 | 1.49 | 6.21E-03 | 2.35E-02 |
| RP4-647C14.2 | 27 | 1.49 | 1.11E-02 | 3.82E-02 |
| RPS6KL1 | 397 | 1.49 | 4.32E-08 | 5.21E-07 |
| FKBP8 | 5615 | 1.49 | 9.72E-04 | 4.77E-03 |
| LEPR | 142 | 1.49 | 1.17E-04 | 7.36E-04 |
| ARNT2 | 1069 | 1.49 | 3.23E-15 | 9.10E-14 |
| ALS2CL | 94 | 1.49 | 1.04E-03 | 5.07E-03 |
| COMT | 4819 | 1.49 | 1.45E-12 | 3.20E-11 |
| RP11-331F4.4 | 32 | 1.49 | 9.20E-03 | 3.27E-02 |
| SEC14L1 | 3837 | 1.49 | 6.90E-22 | 3.60E-20 |
| SLC2A1 | 3009 | 1.49 | 2.08E-24 | 1.29E-22 |
| SRMS | 51 | 1.49 | 8.14E-03 | 2.96E-02 |
| ZNF420 | 87 | 1.49 | 1.22E-03 | 5.82E-03 |
| DNAJC27-AS1 | 62 | 1.49 | 2.82E-03 | 1.21E-02 |
| ELFN2 | 234 | 1.49 | 8.14E-06 | 6.57E-05 |
| LINC00663 | 41 | 1.49 | 5.82E-03 | 2.23E-02 |
| UPK3B | 503 | 1.49 | 2.30E-03 | 1.01E-02 |
| PARP9 | 1174 | 1.49 | 3.46E-12 | 7.27E-11 |
| P4HA2 | 786 | 1.49 | 3.32E-10 | 5.36E-09 |
| DHRSX | 441 | 1.50 | 2.18E-09 | 3.15E-08 |
| AC005355.2 | 30 | 1.50 | 9.65E-03 | 3.40E-02 |
| NEAT1 | 3670 | 1.50 | 2.71E-20 | 1.24E-18 |
| TLCD2 | 59 | 1.50 | 2.62E-03 | 1.13E-02 |
| LINC00035 | 16 | 1.50 | 1.07E-02 | 3.70E-02 |
| DPCD | 444 | 1.50 | 2.06E-09 | 2.99E-08 |
| CDK5 | 1007 | 1.50 | 5.00E-14 | 1.26E-12 |
| DCDC2 | 536 | 1.50 | 5.37E-11 | 9.72E-10 |
| SNTA1 | 117 | 1.50 | 3.60E-04 | 2.00E-03 |
| IL17C | 16 | 1.50 | 1.02E-02 | 3.57E-02 |
| CXXC4 | 60 | 1.50 | 3.03E-03 | 1.28E-02 |
| RP11-284F21.9 | 376 | 1.50 | 1.58E-08 | 2.03E-07 |
| ALPK3 | 128 | 1.50 | 2.33E-04 | 1.36E-03 |
| EPS8L2 | 1611 | 1.50 | 7.06E-04 | 3.61E-03 |
| CORO2A | 583 | 1.50 | 6.41E-11 | 1.15E-09 |
| SYNGR3 | 239 | 1.50 | 1.83E-06 | 1.68E-05 |
| BNIP3 | 1405 | 1.50 | 4.01E-16 | 1.24E-14 |
| CTC-548K16.1 | 15 | 1.50 | 1.02E-02 | 3.57E-02 |
| LMTK3 | 289 | 1.50 | 1.05E-04 | 6.72E-04 |
| RP11-389K14.3 | 30 | 1.50 | 8.14E-03 | 2.96E-02 |
| SDC2 | 713 | 1.50 | 4.03E-13 | 9.34E-12 |
| CDR2 | 680 | 1.50 | 4.41E-12 | 9.13E-11 |
| RP11-298I3.4 | 33 | 1.50 | 8.05E-03 | 2.93E-02 |
| SLC39A10 | 2162 | 1.50 | 3.19E-20 | 1.45E-18 |
| MATN3 | 147 | 1.50 | 5.78E-05 | 3.92E-04 |
| ZNF682 | 100 | 1.50 | 3.89E-04 | 2.14E-03 |
| LGALS3BP | 3185 | 1.50 | 5.90E-17 | 1.99E-15 |
| SLC7A5 | 22098 | 1.51 | 3.12E-16 | 9.84E-15 |
| RP11-766N7.3 | 24 | 1.51 | 9.49E-03 | 3.36E-02 |
| ALDOA | 38587 | 1.51 | 4.13E-19 | 1.72E-17 |
| TBX6 | 222 | 1.51 | 2.70E-05 | 1.97E-04 |
| LASP1 | 4622 | 1.51 | 3.55E-26 | 2.34E-24 |
| PDZD11 | 1606 | 1.51 | 1.48E-18 | 5.70E-17 |
| CLTCL1 | 158 | 1.51 | 5.06E-05 | 3.48E-04 |
| ISYNA1 | 1150 | 1.51 | 4.68E-09 | 6.48E-08 |
| TRAF1 | 71 | 1.51 | 1.50E-03 | 6.99E-03 |
| TANGO2 | 294 | 1.51 | 6.22E-07 | 6.23E-06 |
| C17orf82 | 73 | 1.51 | 2.67E-03 | 1.15E-02 |
| IL17RE | 276 | 1.51 | 3.58E-07 | 3.70E-06 |
| LINC01135 | 20 | 1.51 | 9.10E-03 | 3.25E-02 |
| LINC00659 | 42 | 1.51 | 4.93E-03 | 1.94E-02 |
| P4HA1 | 1240 | 1.51 | 3.12E-15 | 8.80E-14 |
| PIK3CD | 36 | 1.51 | 6.07E-03 | 2.31E-02 |
| C11orf74 | 64 | 1.51 | 1.70E-03 | 7.81E-03 |
| CYB5A | 1287 | 1.51 | 4.40E-19 | 1.81E-17 |
| IFI27L2 | 402 | 1.51 | 5.86E-08 | 6.87E-07 |
| RP11-356J5.12 | 22 | 1.51 | 8.68E-03 | 3.12E-02 |
| TNFRSF12A | 3114 | 1.52 | 1.43E-14 | 3.82E-13 |
| WFS1 | 990 | 1.52 | 1.53E-10 | 2.57E-09 |
| ZDHHC1 | 29 | 1.52 | 6.89E-03 | 2.57E-02 |
| RP11-284F21.10 | 562 | 1.52 | 2.81E-11 | 5.30E-10 |
| RAET1G | 18 | 1.52 | 8.51E-03 | 3.07E-02 |
| SPATC1L | 139 | 1.52 | 2.29E-04 | 1.34E-03 |
| RGS14 | 59 | 1.52 | 2.69E-03 | 1.16E-02 |
| ENTPD2 | 696 | 1.52 | 3.14E-11 | 5.89E-10 |
| PDLIM5 | 3182 | 1.52 | 3.43E-27 | 2.40E-25 |
| SNTB2 | 2439 | 1.52 | 4.80E-16 | 1.48E-14 |
| CHI3L1 | 26 | 1.52 | 7.21E-03 | 2.67E-02 |
| FAM46B | 125 | 1.52 | 8.62E-05 | 5.63E-04 |
| THEM5 | 116 | 1.52 | 2.06E-04 | 1.22E-03 |
| KIAA1467 | 3807 | 1.52 | 4.87E-26 | 3.17E-24 |
| CCDC162P | 99 | 1.52 | 3.80E-04 | 2.10E-03 |
| VASN | 415 | 1.52 | 4.44E-03 | 1.77E-02 |
| SLC25A42 | 352 | 1.52 | 3.65E-08 | 4.46E-07 |
| SH2D5 | 33 | 1.52 | 5.37E-03 | 2.08E-02 |
| TMEM132A | 1727 | 1.52 | 1.03E-10 | 1.79E-09 |
| EVA1C | 61 | 1.52 | 2.18E-03 | 9.66E-03 |
| HPSE | 191 | 1.52 | 5.93E-06 | 4.93E-05 |
| SLC52A1 | 81 | 1.53 | 6.34E-04 | 3.29E-03 |
| CXXC5 | 1798 | 1.53 | 5.04E-13 | 1.15E-11 |
| MYT1 | 15 | 1.53 | 7.31E-03 | 2.70E-02 |
| LINC00858 | 99 | 1.53 | 4.25E-04 | 2.32E-03 |
| SLC3A2 | 8964 | 1.53 | 3.21E-28 | 2.40E-26 |
| ITIH6 | 52 | 1.53 | 2.33E-03 | 1.02E-02 |
| CTD-2196E14.4 | 70 | 1.53 | 1.47E-03 | 6.85E-03 |
| RAB17 | 1527 | 1.53 | 2.15E-19 | 9.09E-18 |
| PI4KA | 4211 | 1.53 | 9.39E-28 | 6.74E-26 |
| ENTPD8 | 65 | 1.53 | 1.51E-03 | 7.05E-03 |
| CCNO | 91 | 1.53 | 8.82E-04 | 4.40E-03 |
| CCDC113 | 120 | 1.53 | 1.49E-04 | 9.15E-04 |
| ADORA1 | 386 | 1.53 | 5.59E-09 | 7.64E-08 |
| SELM | 37 | 1.53 | 5.28E-03 | 2.05E-02 |
| ZNF425 | 278 | 1.54 | 3.32E-07 | 3.46E-06 |
| GPD1L | 4940 | 1.54 | 2.71E-32 | 2.51E-30 |
| SMPDL3A | 1183 | 1.54 | 7.31E-19 | 2.95E-17 |
| PLEKHG6 | 261 | 1.54 | 2.46E-07 | 2.59E-06 |
| AP000439.3 | 34 | 1.54 | 4.47E-03 | 1.78E-02 |
| GPR37 | 101 | 1.54 | 2.54E-04 | 1.47E-03 |
| ZNF573 | 31 | 1.54 | 4.75E-03 | 1.87E-02 |
| CALML5 | 97 | 1.54 | 1.48E-03 | 6.91E-03 |
| KIF9-AS1 | 33 | 1.54 | 4.49E-03 | 1.78E-02 |
| NBPF13P | 51 | 1.54 | 2.79E-03 | 1.19E-02 |
| NPAS2 | 91 | 1.54 | 2.50E-04 | 1.45E-03 |
| LINC00304 | 28 | 1.54 | 5.58E-03 | 2.16E-02 |
| COBLL1 | 1252 | 1.54 | 4.12E-17 | 1.41E-15 |
| LINC00957 | 203 | 1.54 | 4.93E-06 | 4.16E-05 |
| TNIK | 311 | 1.54 | 4.36E-08 | 5.25E-07 |
| CHAC1 | 32 | 1.54 | 4.63E-03 | 1.83E-02 |
| TRIP6 | 4216 | 1.54 | 6.15E-14 | 1.53E-12 |
| MGAT4A | 6438 | 1.55 | 4.10E-35 | 4.42E-33 |
| SERPINE1 | 110 | 1.55 | 1.38E-03 | 6.50E-03 |
| WLS | 36 | 1.55 | 3.82E-03 | 1.56E-02 |
| IFIT1 | 306 | 1.55 | 4.99E-03 | 1.96E-02 |
| ILDR1 | 86 | 1.55 | 3.04E-04 | 1.71E-03 |
| MUC2 | 23 | 1.55 | 5.68E-03 | 2.18E-02 |
| MYRIP | 222 | 1.55 | 4.53E-07 | 4.63E-06 |
| DNAJC6 | 387 | 1.55 | 8.13E-10 | 1.24E-08 |
| RP11-1055B8.3 | 27 | 1.55 | 4.76E-03 | 1.88E-02 |
| TRIM21 | 202 | 1.55 | 1.02E-06 | 9.80E-06 |
| DDX60 | 220 | 1.55 | 7.76E-06 | 6.30E-05 |
| PRSS8 | 1127 | 1.55 | 1.31E-13 | 3.18E-12 |
| SNED1 | 85 | 1.55 | 4.63E-04 | 2.49E-03 |
| SLC4A11 | 177 | 1.55 | 5.06E-06 | 4.26E-05 |
| DUSP16 | 2676 | 1.55 | 4.17E-27 | 2.91E-25 |
| FADS3 | 289 | 1.55 | 1.63E-08 | 2.10E-07 |
| DLG3 | 3536 | 1.55 | 6.33E-28 | 4.60E-26 |
| C1GALT1 | 395 | 1.55 | 9.38E-10 | 1.42E-08 |
| CIRBP-AS1 | 24 | 1.55 | 5.01E-03 | 1.96E-02 |
| FHL1 | 521 | 1.55 | 1.29E-11 | 2.54E-10 |
| NAP1L5 | 39 | 1.55 | 2.74E-03 | 1.17E-02 |
| NME4 | 4291 | 1.56 | 7.45E-18 | 2.74E-16 |
| MYEOV | 80 | 1.56 | 4.94E-04 | 2.64E-03 |
| CAPN14 | 25 | 1.56 | 4.69E-03 | 1.85E-02 |
| C6orf183 | 486 | 1.56 | 5.11E-12 | 1.05E-10 |
| ALG1L | 164 | 1.56 | 7.14E-06 | 5.85E-05 |
| TWSG1 | 1336 | 1.56 | 6.31E-20 | 2.78E-18 |
| CALML3-AS1 | 58 | 1.56 | 1.01E-03 | 4.94E-03 |
| DUSP13 | 16 | 1.56 | 4.71E-03 | 1.86E-02 |
| C19orf66 | 143 | 1.56 | 1.86E-05 | 1.40E-04 |
| LAMC2 | 43 | 1.56 | 2.12E-03 | 9.42E-03 |
| MIPEP | 838 | 1.56 | 6.25E-15 | 1.72E-13 |
| RAB11FIP5 | 295 | 1.56 | 1.23E-08 | 1.61E-07 |
| DNAJB4 | 159 | 1.56 | 5.91E-06 | 4.91E-05 |
| P2RY6 | 268 | 1.56 | 1.32E-07 | 1.46E-06 |
| CITED4 | 50 | 1.56 | 2.13E-03 | 9.45E-03 |
| DBNDD1 | 1963 | 1.56 | 7.87E-14 | 1.93E-12 |
| UBE2L6 | 534 | 1.57 | 6.00E-12 | 1.23E-10 |
| WWC3 | 4849 | 1.57 | 1.18E-28 | 9.03E-27 |
| PSCA | 34 | 1.57 | 3.05E-03 | 1.29E-02 |
| ARSA | 210 | 1.57 | 8.47E-06 | 6.81E-05 |
| APOLD1 | 111 | 1.57 | 7.22E-05 | 4.80E-04 |
| CCDC78 | 432 | 1.57 | 2.37E-07 | 2.51E-06 |
| FBXO6 | 375 | 1.57 | 2.11E-10 | 3.48E-09 |
| NHSL2 | 23 | 1.57 | 4.47E-03 | 1.78E-02 |
| ZNF512B | 3284 | 1.57 | 3.59E-18 | 1.35E-16 |
| NUDT16L1 | 1114 | 1.57 | 3.61E-16 | 1.12E-14 |
| ROR2 | 75 | 1.57 | 3.07E-04 | 1.73E-03 |
| PLXND1 | 941 | 1.57 | 5.94E-13 | 1.35E-11 |
| MFAP3L | 441 | 1.57 | 4.00E-11 | 7.37E-10 |
| BNIP3P1 | 288 | 1.57 | 4.86E-08 | 5.78E-07 |
| ZNF345 | 44 | 1.58 | 2.13E-03 | 9.48E-03 |
| FLRT3 | 27 | 1.58 | 3.66E-03 | 1.51E-02 |
| ISG15 | 1144 | 1.58 | 1.72E-03 | 7.88E-03 |
| RP1-261D10.2 | 130 | 1.58 | 2.46E-05 | 1.81E-04 |
| CNN2 | 818 | 1.58 | 1.59E-14 | 4.20E-13 |
| RP11-379B18.5 | 140 | 1.58 | 2.24E-05 | 1.65E-04 |
| TMBIM1 | 48 | 1.58 | 1.26E-03 | 5.99E-03 |
| SULF1 | 1831 | 1.58 | 9.46E-21 | 4.57E-19 |
| SEMA3B | 646 | 1.58 | 7.73E-11 | 1.38E-09 |
| VAV3 | 985 | 1.58 | 5.57E-18 | 2.06E-16 |
| FNDC3B | 771 | 1.59 | 6.93E-16 | 2.11E-14 |
| ZNF137P | 38 | 1.59 | 1.93E-03 | 8.69E-03 |
| XBP1 | 29926 | 1.59 | 1.35E-39 | 1.73E-37 |
| IGF1R | 8915 | 1.59 | 7.79E-44 | 1.16E-41 |
| MIR22HG | 223 | 1.59 | 2.90E-07 | 3.03E-06 |
| KLF2 | 27 | 1.59 | 2.87E-03 | 1.22E-02 |
| KREMEN1 | 560 | 1.59 | 2.44E-13 | 5.74E-12 |
| L3MBTL3 | 34 | 1.59 | 2.08E-03 | 9.27E-03 |
| ZNF385A | 1365 | 1.59 | 1.35E-15 | 3.97E-14 |
| TPRG1 | 43 | 1.59 | 1.98E-03 | 8.87E-03 |
| TSPEAR | 21 | 1.59 | 3.19E-03 | 1.34E-02 |
| RP1-228H13.5 | 31 | 1.59 | 2.71E-03 | 1.16E-02 |
| ARRDC1 | 2660 | 1.59 | 4.80E-14 | 1.21E-12 |
| GDF15 | 120 | 1.60 | 1.28E-04 | 8.01E-04 |
| SBNO2 | 1334 | 1.60 | 1.19E-04 | 7.49E-04 |
| KIF1A | 607 | 1.60 | 3.12E-13 | 7.30E-12 |
| DIRC3 | 93 | 1.60 | 7.60E-05 | 5.02E-04 |
| BFSP1 | 147 | 1.60 | 4.77E-06 | 4.04E-05 |
| ADM2 | 196 | 1.60 | 1.55E-06 | 1.44E-05 |
| PPP2R5B | 250 | 1.60 | 5.28E-08 | 6.25E-07 |
| ANGPTL4 | 80 | 1.60 | 1.62E-04 | 9.86E-04 |
| RAB30 | 1333 | 1.60 | 4.37E-22 | 2.31E-20 |
| KCNF1 | 36 | 1.60 | 1.73E-03 | 7.95E-03 |
| SALL2 | 353 | 1.60 | 4.97E-10 | 7.83E-09 |
| PLEKHN1 | 182 | 1.60 | 6.85E-06 | 5.62E-05 |
| CRKL | 3223 | 1.61 | 7.63E-31 | 6.51E-29 |
| FBXO44 | 307 | 1.61 | 5.71E-08 | 6.71E-07 |
| SLC16A4 | 106 | 1.61 | 6.41E-05 | 4.30E-04 |
| WDR66 | 59 | 1.61 | 4.43E-04 | 2.40E-03 |
| PPP3CA | 3832 | 1.61 | 1.23E-29 | 9.92E-28 |
| TIMP2 | 1019 | 1.61 | 6.73E-21 | 3.29E-19 |
| NSMF | 1563 | 1.61 | 1.57E-13 | 3.77E-12 |
| PRRT4 | 148 | 1.61 | 2.10E-05 | 1.56E-04 |
| TM7SF2 | 3556 | 1.61 | 2.60E-23 | 1.49E-21 |
| IFIT3 | 63 | 1.61 | 1.24E-03 | 5.90E-03 |
| HCFC1R1 | 1949 | 1.61 | 8.59E-19 | 3.43E-17 |
| ABCC11 | 98 | 1.61 | 4.05E-05 | 2.84E-04 |
| C8orf58 | 104 | 1.61 | 3.17E-05 | 2.28E-04 |
| IL1R1 | 331 | 1.61 | 1.12E-10 | 1.93E-09 |
| SLC29A4 | 166 | 1.62 | 6.69E-06 | 5.50E-05 |
| COL1A1 | 983 | 1.62 | 7.27E-19 | 2.94E-17 |
| C1orf226 | 254 | 1.62 | 1.30E-08 | 1.69E-07 |
| TMEM150A | 445 | 1.62 | 3.01E-12 | 6.33E-11 |
| CTD-2162K18.5 | 18 | 1.62 | 2.28E-03 | 1.00E-02 |
| CCDC68 | 136 | 1.62 | 4.40E-06 | 3.75E-05 |
| PLEKHD1 | 51 | 1.62 | 5.71E-04 | 2.99E-03 |
| PTPN21 | 935 | 1.62 | 3.91E-21 | 1.93E-19 |
| CRIPAK | 234 | 1.62 | 1.42E-08 | 1.84E-07 |
| GRB14 | 281 | 1.63 | 1.30E-09 | 1.92E-08 |
| SLC45A3 | 115 | 1.63 | 2.26E-05 | 1.67E-04 |
| PDE9A | 394 | 1.63 | 8.18E-12 | 1.65E-10 |
| CNNM1 | 155 | 1.63 | 1.79E-06 | 1.64E-05 |
| CCNJL | 64 | 1.63 | 2.66E-04 | 1.53E-03 |
| EFEMP2 | 37 | 1.63 | 1.09E-03 | 5.28E-03 |
| ELF5 | 350 | 1.63 | 3.64E-11 | 6.74E-10 |
| TINCR | 883 | 1.63 | 7.84E-19 | 3.14E-17 |
| ZNF391 | 101 | 1.63 | 1.94E-05 | 1.45E-04 |
| RP3-416H24.1 | 94 | 1.63 | 3.21E-05 | 2.30E-04 |
| MSMB | 62 | 1.63 | 3.49E-04 | 1.95E-03 |
| LDHAP4 | 79 | 1.63 | 1.03E-04 | 6.58E-04 |
| ABAT | 9352 | 1.63 | 2.48E-48 | 4.07E-46 |
| RHOV | 697 | 1.63 | 2.70E-16 | 8.66E-15 |
| AP001062.7 | 118 | 1.63 | 6.81E-06 | 5.59E-05 |
| PON2 | 1474 | 1.63 | 2.17E-26 | 1.45E-24 |
| DDX58 | 463 | 1.63 | 1.24E-10 | 2.11E-09 |
| KLHL22 | 1153 | 1.64 | 8.32E-24 | 4.92E-22 |
| RP11-666A20.4 | 18 | 1.64 | 1.88E-03 | 8.52E-03 |
| HYAL1 | 19 | 1.64 | 1.89E-03 | 8.55E-03 |
| TPRN | 1027 | 1.64 | 1.83E-05 | 1.37E-04 |
| REEP6 | 797 | 1.64 | 1.25E-04 | 7.82E-04 |
| G6PD | 12982 | 1.64 | 9.54E-27 | 6.44E-25 |
| EVA1B | 45 | 1.64 | 9.81E-04 | 4.81E-03 |
| QPRT | 4107 | 1.64 | 1.60E-34 | 1.64E-32 |
| ZNF442 | 21 | 1.64 | 1.76E-03 | 8.07E-03 |
| CYP4F23P | 22 | 1.64 | 1.70E-03 | 7.81E-03 |
| DUSP8 | 298 | 1.64 | 3.90E-07 | 4.02E-06 |
| KCNK5 | 190 | 1.65 | 1.16E-07 | 1.29E-06 |
| NCF2 | 22 | 1.65 | 1.61E-03 | 7.42E-03 |
| SNAI3 | 63 | 1.65 | 2.88E-04 | 1.64E-03 |
| GALM | 20 | 1.65 | 1.58E-03 | 7.33E-03 |
| INHBB | 3309 | 1.65 | 1.54E-32 | 1.44E-30 |
| OASL | 97 | 1.65 | 1.19E-04 | 7.49E-04 |
| SLC1A1 | 133 | 1.65 | 2.67E-06 | 2.38E-05 |
| RP11-268J15.5 | 71 | 1.65 | 9.89E-05 | 6.36E-04 |
| KIAA1217 | 1051 | 1.65 | 2.05E-24 | 1.27E-22 |
| OTUB2 | 216 | 1.66 | 5.07E-08 | 6.01E-07 |
| IMMP2L | 226 | 1.66 | 1.99E-08 | 2.52E-07 |
| MID1 | 302 | 1.66 | 1.51E-10 | 2.54E-09 |
| GLRX | 173 | 1.66 | 2.32E-07 | 2.46E-06 |
| TIMP1 | 1195 | 1.66 | 4.25E-22 | 2.25E-20 |
| PLCL1 | 339 | 1.66 | 2.78E-11 | 5.25E-10 |
| AC139099.5 | 128 | 1.66 | 1.78E-06 | 1.64E-05 |
| ST6GALNAC4 | 124 | 1.66 | 1.12E-05 | 8.72E-05 |
| AMPD3 | 51 | 1.66 | 3.32E-04 | 1.86E-03 |
| NDNL2 | 597 | 1.66 | 4.15E-17 | 1.42E-15 |
| IGF2 | 18 | 1.66 | 1.31E-03 | 6.17E-03 |
| RBM24 | 72 | 1.66 | 6.49E-05 | 4.35E-04 |
| TMPRSS6 | 32 | 1.66 | 8.87E-04 | 4.42E-03 |
| KIAA1324 | 14891 | 1.67 | 1.47E-42 | 2.12E-40 |
| GRHL3 | 822 | 1.67 | 4.95E-16 | 1.52E-14 |
| ZNF701 | 136 | 1.67 | 1.48E-06 | 1.37E-05 |
| FKBP11 | 530 | 1.67 | 2.68E-13 | 6.28E-12 |
| CNTNAP2 | 272 | 1.67 | 3.98E-10 | 6.37E-09 |
| DHX58 | 17 | 1.67 | 1.14E-03 | 5.49E-03 |
| ARVCF | 365 | 1.67 | 2.07E-07 | 2.21E-06 |
| P2RX4 | 2732 | 1.67 | 9.17E-39 | 1.15E-36 |
| KCNH7 | 23 | 1.68 | 1.07E-03 | 5.19E-03 |
| MAPK11 | 530 | 1.68 | 8.20E-15 | 2.24E-13 |
| RAB26 | 861 | 1.68 | 8.20E-17 | 2.71E-15 |
| ABHD4 | 1109 | 1.68 | 1.58E-22 | 8.58E-21 |
| C9orf3 | 1811 | 1.68 | 2.29E-33 | 2.22E-31 |
| C9orf172 | 20 | 1.68 | 1.06E-03 | 5.13E-03 |
| GSN | 1559 | 1.68 | 4.36E-27 | 3.01E-25 |
| SPATA7 | 263 | 1.68 | 2.61E-10 | 4.25E-09 |
| KIAA1199 | 901 | 1.68 | 3.29E-18 | 1.24E-16 |
| CLCF1 | 122 | 1.68 | 2.24E-06 | 2.02E-05 |
| NRP1 | 3454 | 1.68 | 1.18E-34 | 1.24E-32 |
| IL20 | 17 | 1.69 | 9.53E-04 | 4.69E-03 |
| RAB12 | 982 | 1.69 | 1.16E-23 | 6.77E-22 |
| GCSAM | 31 | 1.69 | 6.28E-04 | 3.26E-03 |
| SH2B2 | 97 | 1.69 | 1.20E-05 | 9.33E-05 |
| TMEM191C | 74 | 1.69 | 3.39E-05 | 2.41E-04 |
| ZFHX2 | 145 | 1.69 | 2.38E-07 | 2.52E-06 |
| RP11-818F20.4 | 17 | 1.69 | 8.95E-04 | 4.45E-03 |
| B3GNT3 | 196 | 1.69 | 2.62E-08 | 3.26E-07 |
| ZNF74 | 575 | 1.69 | 4.33E-18 | 1.62E-16 |
| ALCAM | 196 | 1.70 | 5.98E-08 | 7.01E-07 |
| PTK6 | 786 | 1.70 | 4.14E-17 | 1.42E-15 |
| KLF7 | 144 | 1.70 | 1.93E-07 | 2.07E-06 |
| ENG | 23 | 1.70 | 7.69E-04 | 3.91E-03 |
| NDUFV2P1 | 68 | 1.70 | 5.21E-05 | 3.57E-04 |
| OGDHL | 172 | 1.70 | 3.13E-08 | 3.86E-07 |
| CTF1 | 23 | 1.70 | 7.17E-04 | 3.66E-03 |
| MOCS2 | 1879 | 1.70 | 6.61E-35 | 7.02E-33 |
| SOGA2 | 421 | 1.70 | 1.57E-13 | 3.77E-12 |
| SLC6A8 | 2334 | 1.71 | 4.65E-24 | 2.82E-22 |
| SERPINA1 | 76 | 1.71 | 4.87E-05 | 3.36E-04 |
| C6orf52 | 40 | 1.71 | 2.66E-04 | 1.53E-03 |
| SGCE | 1617 | 1.71 | 6.93E-30 | 5.62E-28 |
| GALE | 729 | 1.71 | 4.34E-19 | 1.80E-17 |
| SLC26A1 | 145 | 1.71 | 3.87E-06 | 3.33E-05 |
| RASGEF1B | 148 | 1.71 | 3.99E-07 | 4.10E-06 |
| AATK | 402 | 1.71 | 2.65E-04 | 1.53E-03 |
| PLD1 | 47 | 1.72 | 1.49E-04 | 9.15E-04 |
| LDHA | 15391 | 1.72 | 4.63E-38 | 5.72E-36 |
| STK31 | 45 | 1.72 | 1.43E-04 | 8.80E-04 |
| UMODL1 | 55 | 1.72 | 7.25E-05 | 4.82E-04 |
| TUBB2A | 138 | 1.73 | 4.06E-07 | 4.17E-06 |
| GPR155 | 217 | 1.73 | 1.17E-09 | 1.74E-08 |
| DALRD3 | 803 | 1.73 | 1.62E-23 | 9.34E-22 |
| TMEM2 | 2438 | 1.73 | 4.61E-36 | 5.28E-34 |
| FGFR3 | 731 | 1.73 | 1.16E-12 | 2.58E-11 |
| CLCN4 | 248 | 1.73 | 1.31E-10 | 2.22E-09 |
| PRRG2 | 85 | 1.74 | 7.28E-06 | 5.95E-05 |
| RCAN1 | 3112 | 1.74 | 1.46E-48 | 2.42E-46 |
| GHDC | 433 | 1.74 | 1.40E-11 | 2.74E-10 |
| SEPT5 | 135 | 1.74 | 4.46E-07 | 4.57E-06 |
| TUBA4A | 182 | 1.74 | 6.77E-09 | 9.16E-08 |
| GPRC5A | 2355 | 1.74 | 3.46E-34 | 3.50E-32 |
| TMEM63C | 337 | 1.74 | 1.22E-13 | 2.95E-12 |
| ACP5 | 20 | 1.74 | 4.63E-04 | 2.49E-03 |
| TNRC6C-AS1 | 102 | 1.74 | 1.82E-06 | 1.66E-05 |
| CYFIP2 | 3872 | 1.74 | 3.16E-53 | 6.26E-51 |
| NCKAP5L | 985 | 1.75 | 7.68E-16 | 2.31E-14 |
| CLU | 14574 | 1.75 | 3.03E-47 | 4.92E-45 |
| CELSR1 | 3750 | 1.75 | 9.09E-27 | 6.16E-25 |
| MMRN2 | 45 | 1.75 | 1.38E-04 | 8.51E-04 |
| RP11-253M7.1 | 77 | 1.75 | 1.20E-05 | 9.34E-05 |
| ACSL1 | 1320 | 1.75 | 4.19E-30 | 3.46E-28 |
| HPN | 142 | 1.76 | 1.01E-07 | 1.14E-06 |
| PFKFB4 | 390 | 1.76 | 4.54E-13 | 1.04E-11 |
| ZNF43 | 118 | 1.76 | 2.45E-07 | 2.59E-06 |
| ZNF649 | 30 | 1.76 | 2.79E-04 | 1.59E-03 |
| MAGEE1 | 49 | 1.76 | 6.33E-05 | 4.25E-04 |
| KNDC1 | 126 | 1.76 | 3.48E-07 | 3.61E-06 |
| LRP2 | 37 | 1.76 | 1.38E-04 | 8.54E-04 |
| PCDHB14 | 126 | 1.77 | 2.37E-07 | 2.51E-06 |
| PTRF | 334 | 1.77 | 2.12E-14 | 5.50E-13 |
| CISH | 506 | 1.77 | 3.51E-16 | 1.10E-14 |
| RP11-459E5.1 | 134 | 1.77 | 5.06E-08 | 6.01E-07 |
| RP5-1065J22.8 | 212 | 1.77 | 5.88E-10 | 9.17E-09 |
| SUSD2 | 564 | 1.77 | 1.66E-14 | 4.37E-13 |
| CSRP1 | 13042 | 1.77 | 5.50E-69 | 1.69E-66 |
| NR4A1 | 1605 | 1.77 | 5.60E-18 | 2.07E-16 |
| RP11-5C23.1 | 69 | 1.78 | 9.05E-06 | 7.23E-05 |
| THAP7 | 659 | 1.78 | 8.10E-16 | 2.43E-14 |
| CITED2 | 2465 | 1.78 | 2.04E-30 | 1.72E-28 |
| LA16c-380H5.3 | 18 | 1.78 | 2.43E-04 | 1.42E-03 |
| AKAP9 | 13324 | 1.78 | 1.44E-52 | 2.76E-50 |
| DOK7 | 549 | 1.78 | 8.39E-05 | 5.49E-04 |
| UAP1L1 | 1518 | 1.78 | 1.40E-34 | 1.45E-32 |
| FBLIM1 | 102 | 1.79 | 9.76E-07 | 9.43E-06 |
| SLC2A1-AS1 | 41 | 1.79 | 8.24E-05 | 5.40E-04 |
| ABHD11 | 3027 | 1.79 | 3.84E-40 | 5.08E-38 |
| ACACB | 3593 | 1.79 | 3.31E-50 | 5.76E-48 |
| LINC00689 | 66 | 1.79 | 1.13E-05 | 8.80E-05 |
| L1CAM | 1479 | 1.80 | 2.20E-25 | 1.39E-23 |
| RHOBTB2 | 1685 | 1.80 | 2.54E-38 | 3.16E-36 |
| AC023158.1 | 18 | 1.80 | 2.07E-04 | 1.22E-03 |
| MIR210HG | 90 | 1.80 | 9.08E-07 | 8.82E-06 |
| AJUBA | 1401 | 1.80 | 1.44E-36 | 1.68E-34 |
| OSCP1 | 111 | 1.80 | 2.74E-07 | 2.87E-06 |
| RP11-446N19.1 | 104 | 1.80 | 3.54E-07 | 3.67E-06 |
| LEF1 | 86 | 1.81 | 1.35E-06 | 1.27E-05 |
| AMOTL2 | 2755 | 1.81 | 6.21E-31 | 5.34E-29 |
| ZNF239 | 400 | 1.81 | 2.68E-17 | 9.31E-16 |
| AC007246.3 | 220 | 1.81 | 1.69E-11 | 3.26E-10 |
| CADPS2 | 1495 | 1.81 | 8.15E-34 | 8.06E-32 |
| PTAFR | 45 | 1.81 | 5.60E-05 | 3.80E-04 |
| COL5A2 | 519 | 1.81 | 9.68E-21 | 4.64E-19 |
| HLA-F | 112 | 1.81 | 3.35E-07 | 3.49E-06 |
| MED15 | 1277 | 1.82 | 4.80E-26 | 3.14E-24 |
| APOE | 122 | 1.82 | 4.21E-07 | 4.32E-06 |
| CCDC154 | 54 | 1.82 | 3.17E-05 | 2.27E-04 |
| TRAV39 | 43 | 1.82 | 4.71E-05 | 3.25E-04 |
| ZC4H2 | 30 | 1.82 | 1.20E-04 | 7.53E-04 |
| SH3D21 | 208 | 1.82 | 2.83E-10 | 4.58E-09 |
| SULT1A1 | 165 | 1.82 | 1.49E-09 | 2.19E-08 |
| THAP7-AS1 | 48 | 1.83 | 2.95E-05 | 2.14E-04 |
| VAMP5 | 125 | 1.83 | 5.41E-08 | 6.39E-07 |
| FHL2 | 68 | 1.83 | 3.35E-06 | 2.93E-05 |
| FOXP1 | 1759 | 1.83 | 2.12E-37 | 2.56E-35 |
| RP11-400K9.4 | 143 | 1.83 | 3.15E-09 | 4.43E-08 |
| RP11-839D17.3 | 46 | 1.83 | 2.52E-05 | 1.85E-04 |
| MAPK8IP2 | 122 | 1.83 | 4.78E-08 | 5.70E-07 |
| PLAC1 | 21 | 1.84 | 1.20E-04 | 7.53E-04 |
| TRAV30 | 33 | 1.84 | 7.57E-05 | 5.01E-04 |
| AZGP1P1 | 22 | 1.84 | 1.16E-04 | 7.34E-04 |
| ERRFI1 | 952 | 1.84 | 5.03E-24 | 3.04E-22 |
| AP004372.1 | 30 | 1.84 | 8.00E-05 | 5.27E-04 |
| SAMD9 | 145 | 1.85 | 7.93E-08 | 9.13E-07 |
| DTNA | 2069 | 1.85 | 1.75E-46 | 2.80E-44 |
| STARD13 | 1616 | 1.85 | 5.10E-45 | 8.00E-43 |
| TP53INP2 | 356 | 1.85 | 2.20E-16 | 7.13E-15 |
| MACC1 | 1348 | 1.85 | 3.60E-32 | 3.29E-30 |
| RP11-326G21.1 | 75 | 1.85 | 3.62E-06 | 3.14E-05 |
| NCAM1 | 37 | 1.85 | 4.15E-05 | 2.90E-04 |
| NR4A3 | 137 | 1.86 | 9.10E-09 | 1.21E-07 |
| ZNF525 | 193 | 1.86 | 3.06E-11 | 5.75E-10 |
| HIP1 | 3178 | 1.86 | 1.77E-60 | 4.19E-58 |
| SP100 | 196 | 1.86 | 3.25E-11 | 6.08E-10 |
| ZNF85 | 172 | 1.86 | 1.32E-10 | 2.24E-09 |
| GULP1 | 488 | 1.86 | 2.91E-21 | 1.46E-19 |
| SLC22A31 | 27 | 1.87 | 7.55E-05 | 5.00E-04 |
| GAS6 | 121 | 1.87 | 1.25E-08 | 1.63E-07 |
| ALDOC | 447 | 1.87 | 1.47E-17 | 5.25E-16 |
| PEG10 | 3484 | 1.87 | 1.85E-52 | 3.52E-50 |
| TRGC2 | 243 | 1.87 | 2.12E-13 | 5.04E-12 |
| DDX11L10 | 15 | 1.87 | 6.55E-05 | 4.38E-04 |
| UNC5C | 56 | 1.88 | 5.22E-06 | 4.37E-05 |
| RBP5 | 20 | 1.89 | 6.21E-05 | 4.18E-04 |
| FGD3 | 352 | 1.89 | 2.08E-14 | 5.41E-13 |
| ZDHHC11 | 163 | 1.89 | 8.28E-11 | 1.46E-09 |
| TMCC3 | 187 | 1.89 | 5.29E-12 | 1.09E-10 |
| LZTR1 | 911 | 1.89 | 8.67E-28 | 6.26E-26 |
| COL6A1 | 265 | 1.90 | 2.74E-12 | 5.80E-11 |
| ZNF793 | 162 | 1.90 | 4.88E-10 | 7.69E-09 |
| BEX4 | 49 | 1.90 | 1.21E-05 | 9.43E-05 |
| AP000769.1 | 41 | 1.90 | 1.10E-05 | 8.60E-05 |
| CACNA2D4 | 99 | 1.91 | 7.81E-08 | 9.01E-07 |
| YIPF6 | 1735 | 1.91 | 7.44E-42 | 1.04E-39 |
| CAP2 | 1620 | 1.91 | 1.02E-44 | 1.58E-42 |
| C8G | 22 | 1.91 | 4.17E-05 | 2.92E-04 |
| IFI6 | 940 | 1.91 | 1.78E-25 | 1.14E-23 |
| AL161626.1 | 43 | 1.92 | 3.75E-05 | 2.64E-04 |
| ZNF365 | 115 | 1.92 | 1.04E-08 | 1.37E-07 |
| RP3-439F8.1 | 139 | 1.92 | 3.55E-10 | 5.70E-09 |
| C3orf52 | 168 | 1.92 | 2.07E-10 | 3.42E-09 |
| TMEM191A | 216 | 1.93 | 3.00E-09 | 4.23E-08 |
| OSBPL5 | 403 | 1.93 | 8.13E-17 | 2.70E-15 |
| EHF | 110 | 1.94 | 5.50E-09 | 7.53E-08 |
| RND1 | 520 | 1.94 | 1.02E-22 | 5.64E-21 |
| VTN | 18 | 1.94 | 2.99E-05 | 2.17E-04 |
| NFASC | 62 | 1.94 | 8.00E-07 | 7.86E-06 |
| FSTL3 | 626 | 1.94 | 1.56E-23 | 8.99E-22 |
| TRPV3 | 61 | 1.94 | 7.93E-07 | 7.80E-06 |
| RORC | 260 | 1.95 | 1.69E-15 | 4.91E-14 |
| CTD-2291D10.4 | 31 | 1.95 | 1.72E-05 | 1.30E-04 |
| RP1-140K8.5 | 31 | 1.95 | 1.61E-05 | 1.22E-04 |
| RP11-96H19.1 | 376 | 1.95 | 3.19E-20 | 1.45E-18 |
| IL17REL | 60 | 1.96 | 1.23E-06 | 1.17E-05 |
| B4GALT1 | 6974 | 1.96 | 2.61E-77 | 1.02E-74 |
| TM4SF4 | 23 | 1.96 | 2.11E-05 | 1.57E-04 |
| RP11-18B16.2 | 23 | 1.96 | 2.15E-05 | 1.59E-04 |
| IFI27 | 98 | 1.96 | 2.14E-08 | 2.69E-07 |
| RGS11 | 37 | 1.96 | 8.02E-06 | 6.49E-05 |
| ADAM12 | 41 | 1.97 | 4.66E-06 | 3.95E-05 |
| CAP1P2 | 15 | 1.97 | 1.64E-05 | 1.25E-04 |
| HLA-DRB1 | 72 | 1.97 | 1.60E-07 | 1.74E-06 |
| LIMK2 | 1219 | 1.98 | 1.31E-41 | 1.79E-39 |
| ENPP1 | 1467 | 1.98 | 3.18E-37 | 3.80E-35 |
| TTC12 | 563 | 1.98 | 4.90E-28 | 3.61E-26 |
| H19 | 344 | 1.99 | 4.14E-13 | 9.57E-12 |
| WNT9A | 312 | 2.00 | 3.18E-14 | 8.10E-13 |
| SPAG4 | 98 | 2.00 | 2.98E-08 | 3.69E-07 |
| FST | 183 | 2.00 | 1.21E-13 | 2.95E-12 |
| TGM1 | 256 | 2.00 | 2.31E-16 | 7.46E-15 |
| GNAO1 | 26 | 2.01 | 8.25E-06 | 6.65E-05 |
| ZNF528 | 108 | 2.01 | 9.58E-10 | 1.45E-08 |
| MRPL23-AS1 | 75 | 2.01 | 9.89E-08 | 1.12E-06 |
| EME2 | 837 | 2.01 | 2.26E-27 | 1.60E-25 |
| HBEGF | 73 | 2.02 | 5.09E-08 | 6.03E-07 |
| RP11-734K21.2 | 40 | 2.02 | 2.70E-06 | 2.40E-05 |
| TUBB3 | 1089 | 2.03 | 1.80E-10 | 2.98E-09 |
| LAMB1 | 3558 | 2.03 | 1.39E-74 | 5.03E-72 |
| ZNF485 | 397 | 2.03 | 2.68E-23 | 1.53E-21 |
| AC005237.4 | 20 | 2.04 | 7.22E-06 | 5.91E-05 |
| FLVCR2 | 1154 | 2.04 | 1.21E-39 | 1.56E-37 |
| UNC13D | 3072 | 2.04 | 4.95E-14 | 1.25E-12 |
| WNT10B | 104 | 2.04 | 5.91E-10 | 9.20E-09 |
| KRT121P | 383 | 2.05 | 1.39E-22 | 7.58E-21 |
| HAR1B | 123 | 2.05 | 8.01E-11 | 1.42E-09 |
| SLC12A2 | 7686 | 2.05 | 5.11E-72 | 1.64E-69 |
| TRGC1 | 3402 | 2.06 | 2.79E-72 | 9.16E-70 |
| SLC7A8 | 130 | 2.07 | 1.17E-11 | 2.30E-10 |
| RP11-739N20.2 | 35 | 2.08 | 1.46E-06 | 1.36E-05 |
| SNAP29 | 1737 | 2.08 | 1.38E-63 | 3.50E-61 |
| LINC00885 | 126 | 2.09 | 8.39E-11 | 1.48E-09 |
| PCDHB13 | 125 | 2.09 | 6.41E-11 | 1.15E-09 |
| SEMA3A | 716 | 2.09 | 7.48E-37 | 8.78E-35 |
| GRIN1 | 311 | 2.10 | 2.45E-15 | 6.99E-14 |
| RNF224 | 67 | 2.11 | 4.93E-08 | 5.86E-07 |
| FAM174A | 503 | 2.12 | 2.25E-24 | 1.39E-22 |
| LMO7 | 2413 | 2.12 | 3.71E-76 | 1.41E-73 |
| RILP | 171 | 2.12 | 1.96E-13 | 4.67E-12 |
| RP11-279F6.1 | 156 | 2.12 | 3.94E-13 | 9.15E-12 |
| ITM2A | 25 | 2.12 | 1.68E-06 | 1.55E-05 |
| ZNF737 | 158 | 2.12 | 5.61E-14 | 1.40E-12 |
| ATP13A4 | 64 | 2.13 | 1.84E-08 | 2.34E-07 |
| PPP1R1C | 127 | 2.13 | 8.21E-12 | 1.65E-10 |
| S100P | 144 | 2.13 | 6.05E-12 | 1.24E-10 |
| GPX8 | 246 | 2.13 | 9.29E-19 | 3.69E-17 |
| KRTAP5-AS1 | 184 | 2.14 | 1.63E-15 | 4.76E-14 |
| TMEM163 | 18 | 2.15 | 1.33E-06 | 1.25E-05 |
| SSFA2 | 39634 | 2.15 | 7.23E-121 | 6.14E-118 |
| PARM1 | 244 | 2.15 | 2.40E-17 | 8.39E-16 |
| ARX | 39 | 2.15 | 2.92E-07 | 3.05E-06 |
| ALG10 | 640 | 2.15 | 1.15E-35 | 1.27E-33 |
| TM4SF1 | 62 | 2.15 | 1.29E-08 | 1.68E-07 |
| COL9A2 | 243 | 2.16 | 1.20E-17 | 4.30E-16 |
| CYP4A22-AS1 | 28 | 2.16 | 7.88E-07 | 7.76E-06 |
| KRT7 | 595 | 2.18 | 2.36E-35 | 2.58E-33 |
| CD59 | 8139 | 2.20 | 1.82E-113 | 1.31E-110 |
| PRODH | 110 | 2.20 | 1.08E-11 | 2.14E-10 |
| CLIC3 | 1318 | 2.21 | 7.88E-08 | 9.08E-07 |
| TMEM40 | 46 | 2.21 | 3.60E-08 | 4.40E-07 |
| CRAT | 292 | 2.22 | 2.58E-21 | 1.30E-19 |
| RAB32 | 54 | 2.22 | 8.83E-09 | 1.18E-07 |
| HSPB8 | 2061 | 2.22 | 1.10E-67 | 3.25E-65 |
| MAOA | 2058 | 2.23 | 3.09E-78 | 1.24E-75 |
| PTPN13 | 6922 | 2.24 | 1.76E-89 | 9.08E-87 |
| C1orf64 | 62 | 2.25 | 4.64E-09 | 6.42E-08 |
| SERPINA5 | 18 | 2.26 | 2.37E-07 | 2.51E-06 |
| PPARGC1A | 443 | 2.27 | 3.56E-32 | 3.27E-30 |
| RP11-35O15.1 | 112 | 2.27 | 9.19E-12 | 1.83E-10 |
| C9orf169 | 226 | 2.27 | 7.77E-17 | 2.58E-15 |
| C2orf54 | 148 | 2.27 | 1.77E-14 | 4.63E-13 |
| PPM1J | 134 | 2.28 | 1.56E-14 | 4.12E-13 |
| ZNF790 | 73 | 2.28 | 4.58E-10 | 7.24E-09 |
| NTSR1 | 158 | 2.29 | 4.77E-15 | 1.32E-13 |
| ZNF229 | 90 | 2.29 | 9.87E-12 | 1.96E-10 |
| MAST4 | 1118 | 2.29 | 4.12E-49 | 6.91E-47 |
| COL6A2 | 178 | 2.29 | 2.93E-16 | 9.33E-15 |
| MVP | 593 | 2.29 | 3.30E-34 | 3.35E-32 |
| RP11-168E14.1 | 77 | 2.30 | 1.12E-10 | 1.93E-09 |
| DAB2 | 886 | 2.30 | 1.38E-52 | 2.70E-50 |
| TNFRSF19 | 92 | 2.33 | 5.09E-12 | 1.05E-10 |
| CLSTN3 | 1142 | 2.33 | 3.81E-61 | 9.16E-59 |
| MUC1 | 3376 | 2.35 | 3.09E-85 | 1.49E-82 |
| NLRP1 | 48 | 2.37 | 1.85E-09 | 2.69E-08 |
| IGFBP5 | 52421 | 2.37 | 2.52E-156 | 3.64E-153 |
| MUC5B | 4928 | 2.37 | 2.01E-19 | 8.55E-18 |
| HS3ST5 | 15 | 2.41 | 2.17E-08 | 2.73E-07 |
| FAM189A1 | 83 | 2.42 | 3.59E-12 | 7.50E-11 |
| FAM149A | 97 | 2.42 | 1.17E-13 | 2.84E-12 |
| S100A14 | 6289 | 2.44 | 7.43E-125 | 6.70E-122 |
| SMOC1 | 253 | 2.44 | 2.00E-26 | 1.34E-24 |
| RP11-366L5.1 | 487 | 2.47 | 6.51E-40 | 8.47E-38 |
| ZNF860 | 669 | 2.47 | 9.56E-54 | 1.94E-51 |
| MDK | 8756 | 2.47 | 3.19E-64 | 8.33E-62 |
| FAM83A | 41 | 2.47 | 2.74E-09 | 3.89E-08 |
| GABRG2 | 215 | 2.48 | 2.34E-24 | 1.44E-22 |
| AP001816.1 | 318 | 2.48 | 6.23E-28 | 4.55E-26 |
| PGR | 294 | 2.49 | 7.46E-29 | 5.79E-27 |
| BST2 | 145 | 2.50 | 8.01E-19 | 3.20E-17 |
| CCDC83 | 150 | 2.51 | 3.84E-19 | 1.60E-17 |
| DSCR8 | 54 | 2.52 | 4.93E-11 | 8.96E-10 |
| SLC43A2 | 2561 | 2.53 | 2.45E-65 | 6.66E-63 |
| ABCD1 | 2181 | 2.58 | 4.93E-55 | 1.06E-52 |
| AC006372.5 | 24 | 2.59 | 1.80E-09 | 2.63E-08 |
| ABCC2 | 157 | 2.59 | 3.29E-21 | 1.64E-19 |
| FBXO2 | 215 | 2.62 | 1.44E-21 | 7.33E-20 |
| CA5B | 729 | 2.62 | 6.53E-52 | 1.21E-49 |
| MAPK10 | 321 | 2.64 | 1.44E-34 | 1.48E-32 |
| LA16c-380H5.4 | 39 | 2.64 | 1.08E-10 | 1.86E-09 |
| FOLH1 | 20 | 2.66 | 6.43E-10 | 9.97E-09 |
| RP11-734K21.5 | 178 | 2.68 | 9.00E-24 | 5.31E-22 |
| CRLF1 | 979 | 2.70 | 2.21E-45 | 3.51E-43 |
| PCDHGA5 | 53 | 2.71 | 2.36E-12 | 5.05E-11 |
| MAPK4 | 5125 | 2.73 | 7.38E-174 | 1.33E-170 |
| TNC | 57 | 2.75 | 3.09E-13 | 7.23E-12 |
| PPFIA4 | 138 | 2.75 | 1.30E-20 | 6.11E-19 |
| SECTM1 | 130 | 2.76 | 1.76E-17 | 6.24E-16 |
| TM4SF18 | 136 | 2.80 | 1.86E-20 | 8.61E-19 |
| RP11-279F6.2 | 47 | 2.82 | 1.30E-12 | 2.88E-11 |
| SPINK4 | 596 | 2.88 | 2.83E-56 | 6.19E-54 |
| KRT86 | 525 | 2.89 | 1.13E-51 | 2.07E-49 |
| HTR7P1 | 455 | 2.90 | 1.63E-53 | 3.26E-51 |
| ADAMTS9 | 1098 | 2.93 | 1.17E-96 | 6.27E-94 |
| SPNS2 | 214 | 2.95 | 3.10E-26 | 2.05E-24 |
| PAH | 26 | 2.95 | 7.14E-12 | 1.45E-10 |
| FADS2 | 4411 | 2.96 | 1.25E-180 | 2.58E-177 |
| CPS1 | 25013 | 2.96 | 5.05E-126 | 4.86E-123 |
| IYD | 40 | 2.97 | 3.63E-13 | 8.44E-12 |
| CEACAM5 | 224 | 3.02 | 1.75E-33 | 1.72E-31 |
| CPHL1P | 547 | 3.02 | 5.51E-52 | 1.03E-49 |
| EMP1 | 207 | 3.02 | 1.66E-28 | 1.26E-26 |
| ADM | 94 | 3.05 | 4.30E-19 | 1.79E-17 |
| RNU6-813P | 227 | 3.08 | 1.07E-35 | 1.19E-33 |
| HEBP1 | 3088 | 3.10 | 1.91E-186 | 4.60E-183 |
| BMPR1B | 3371 | 3.14 | 1.81E-157 | 2.90E-154 |
| KCNH1 | 35 | 3.19 | 6.48E-14 | 1.61E-12 |
| KRT81 | 30908 | 3.22 | 6.59E-38 | 8.06E-36 |
| GGT6 | 505 | 3.24 | 9.39E-67 | 2.61E-64 |
| CACNB2 | 531 | 3.30 | 4.43E-74 | 1.56E-71 |
| GPR133 | 192 | 3.32 | 1.88E-29 | 1.49E-27 |
| FRMD1 | 47 | 3.34 | 3.12E-16 | 9.84E-15 |
| GDPD3 | 697 | 3.36 | 5.37E-68 | 1.61E-65 |
| LPAR5 | 30 | 3.39 | 6.54E-15 | 1.79E-13 |
| OSBPL10 | 3669 | 3.48 | 6.95E-212 | 3.34E-208 |
| RP11-438D14.2 | 223 | 3.52 | 2.59E-42 | 3.70E-40 |
| TNFRSF11B | 510 | 3.52 | 1.47E-78 | 6.23E-76 |
| SYBU | 517 | 3.58 | 1.42E-67 | 4.06E-65 |
| NAV2 | 144 | 3.68 | 1.21E-32 | 1.13E-30 |
| SYT10 | 4013 | 3.70 | 8.86E-203 | 3.20E-199 |
| BDKRB2 | 153 | 3.72 | 4.68E-34 | 4.69E-32 |
| FAM13C | 112 | 3.76 | 2.65E-29 | 2.09E-27 |
| AC110619.1 | 68 | 3.82 | 3.09E-21 | 1.54E-19 |
| AP001626.1 | 154 | 4.23 | 7.67E-38 | 9.30E-36 |
| CYP1A1 | 231 | 4.34 | 1.69E-56 | 3.76E-54 |
| SMOX | 356 | 4.41 | 1.18E-72 | 4.04E-70 |
| ACTG2 | 189 | 4.48 | 2.17E-49 | 3.68E-47 |
| AC110619.2 | 133 | 4.49 | 2.07E-36 | 2.40E-34 |
| TNFSF15 | 146 | 4.70 | 1.37E-43 | 2.00E-41 |
| CYP19A1 | 153 | 4.74 | 1.19E-43 | 1.76E-41 |
| ST6GAL1 | 377 | 5.09 | 1.22E-87 | 6.07E-85 |
| GABRA1 | 62 | 5.38 | 5.05E-31 | 4.39E-29 |
| RP11-206M11.7 | 4346 | 5.51 | 0.00E+00 | 0.00E+00 |
| GRAMD2 | 180 | 5.81 | 1.48E-61 | 3.68E-59 |
| SLC4A9 | 55 | 5.98 | 4.16E-33 | 3.95E-31 |
| CLUL1 | 174 | 17.14 | 7.58E-107 | 4.38E-104 |
